# Supplementary material for: Differential chondrogenic differentiation between iPSC derived from healthy and OA cartilage is associated with changes in epigenetic regulation and metabolic transcriptomic signatures
Source: eLife. 2023 Jan 30;12:e83138. doi: 10.7554/eLife.83138 (PMC9886280; doi:10.7554/eLife.83138)
Supplement: Figure 1—source data 1. [file elife-83138-fig1-data1.xlsx]

## Sheet: Fig. 1C
	Clone #7				Clone #14				Clone #15				Clone #2				Clone #5				Clone #8
Gene	AC-iMSC	AC-iPSC	Paired T test		AC-iMSC	AC-iPSC	Paired T test		AC-iMSC	AC-iPSC	Paired T test		OA-iMSC	OA-iPSC	Paired T test		OA-iMSC	OA-iPSC	Paired T test		OA-iMSC	OA-iPSC	Paired T test
SOX2	1	176.204	0.000353404		1	216.212	0.000148242		1	198.3	0.000177875		1	213.457	0.000116694		1	202.1	0.000138815		1	185.3	0.000137426
	1.102	193.2			1.2314	204			1.124	202.4			1.4312	225.4			1.452	195.6			1.325	190.8
	1.25	184.36			1.354	211.245			1.054	211.3			1.1726	220.364			1.698	207.324			1.6843	196.874
(OCT4)	1	149.853	0.000301623		1	88.6272	0.00049305		1	120.4	0.000115642		1	98.3088	0.000276676		1	120.3	0.000551088		1	162.9	0.000330502
	1.197	152.3			1.106	98.6			1.124	126.3			1.034	102.4			1.2343	119.4			1.782	158.4
	1.201	162.34			1.298	92.3412			1.119	125.967			1.124	106.7			1.586	132.52			1.351	172.341
NANOG	1	26.4043	0.00413569		1	25.1044	0.000911281		1	29.43	0.00105353		1	34.189	0.00132043		1	35.9	0.00156955		1	46.3	0.000914782
	1.34	36.3			1.0112	23.2			1.251	34.6			1.141	28.9			1.035	32.8			1.354	42.8
	1.067	32.89			1.21	26.951			1.106	31.985			1.1102	31.5024			1.159	29.874			1.254	49.34
KLF4	1	5.32234	0.00232145		1	4.85305	0.0035807		1	7.9	0.00157333		1	6.62529	0.00188319		1	4.9	0.00165405		1	6.2	0.000245745
	1.354	5.6			1.032	5.9			1.047	6.8			1.1108	5.98			1.0254	5.4			1.024	5.9
	1.096	6.321			1.1624	6.3102			1.249	8.031			1.296	7.321			1.247	6.014			1.119	6.348
