# Supplementary material for: Differential chondrogenic differentiation between iPSC derived from healthy and OA cartilage is associated with changes in epigenetic regulation and metabolic transcriptomic signatures
Source: eLife. 2023 Jan 30;12:e83138. doi: 10.7554/eLife.83138 (PMC9886280; doi:10.7554/eLife.83138)
Supplement: Figure 2—source data 1. [file elife-83138-fig2-data1.xlsx]

## Sheet: Fig. 2B
	Clone #7				Clone #14				Clone #15				Clone #2				Clone #5				Clone #8
Gene	AC-iPSC	AC-iMSC	Paired T test		AC-iPSC	AC-iMSC	Paired T test		AC-iPSC	AC-iMSC	Paired T test		OA-iPSC	OA-iMSC	Paired T test		OA-iPSC	OA-iMSC	Paired T test		OA-iPSC	OA-iMSC	Paired T test
SOX2	1	-216.21	0.000521545		1	-186.621	0.000645702		1	-198.3	0.000115243		1	-165.34	0.000472863		1	-147.17	9.33573e-05		1	-172.34	0.000456307
	1.3641	-193.2			1.245	-204.12			1.6972	-202.4			1.024	-148.78			1.485	-139.89			1.647	-183.54
	1.102	-201.64			1.397	-210.5			1.3654	-208.67			1.3541	-154.32			1.324	-142.75			1.952	-190.43
(OCT4)	1	-83.63	0.000719719		1	-78.723	0.00210382		1	-92.4	0.000194739		1	-102.29	0.000165497		1	-109.34	0.000439361		1	-102.32	0.000291283
	1.304	-72.9			1.124	-98.6			1.0254	-86.3			1.352	-99.18			1.002	-118.46			1.35	-110.3
	1.098	-79.354			1.034	-92.68			1.114	-88.367			1.129	-105.91			1.406	-120.3			1.67	-108.94
TW1ST1	1	75.67	0.0012074		1	65.438	0.000603472		1	69.1243	0.000217399		1	120.34	0.000603789		1	134.38	0.000533512		1	89.124	0.000303622
	1.1032	86.3			1.114	73.8			1.325	74.26			1.036	106.89			1.025	123.58			1.59	83.65
	1.312	89.36			1.504	69.874			1.258	70.42			1.631	115.98			1.963	138.7			1.87	90.59
RUNX1	1	184.8	0.000511925		1	144.853	0.000204864		1	167.9	0.000103772		1	169.27	0.000214435		1	157.31	0.000167289		1	167.23	0.000510209
	1.112	165.6			1.432	155.69			1.08	176.38			1.035	158.65			1.492	148.23			1.65	150.43
	1.541	176.89			1.198	151.34			1.472	171.34			1.375	160.35			1.354	152.34			1.158	158.96
COL1A1	1	81.94	0.000489199		1	78.63	0.000183669		1	69.74	0.000234797		1	98.46	0.000581586		1	103.13	0.000184348		1	89.54	0.00138824
	1.102	90.6			1.083	73.8			1.205	65.76			1.216	90.34			1.035	107.8			1.5004	75.36
	1.1136	89.614			1.321	77.35			1.119	70.24			1.412	101.3			1.3004	110.35			1.689	85.64
