# Supplementary material for: Differential chondrogenic differentiation between iPSC derived from healthy and OA cartilage is associated with changes in epigenetic regulation and metabolic transcriptomic signatures
Source: eLife. 2023 Jan 30;12:e83138. doi: 10.7554/eLife.83138 (PMC9886280; doi:10.7554/eLife.83138)
Supplement: Figure 2—source data 2. [file elife-83138-fig2-data2.xlsx]

## Sheet: Sheet1
	CD44	CD90	CD105	CD166	CD73	CD31	CD45
AC-iMSC (#7)	84.6	96.3	67.9	79.2	91.9	6.4	9.1
AC-iMSC (#14)	85.9	90.8	73.2	83.6	96.4	3.2	7.3
AC-iMSC (#15)	89.8	93.7	77.9	89.6	97.3	5.6	6.9
OA-iMSCs(#2)	81.7	90.8	66	73.6	92.1	9.5	10.7
OA-iMSCs(#5)	87.9	85.7	72.6	84.1	89.8	3.8	5.9
OA-iMSCs(#8)	90.3	91.2	78.9	79.9	94.5	6.1	6.3
