# Supplementary material for: Differential chondrogenic differentiation between iPSC derived from healthy and OA cartilage is associated with changes in epigenetic regulation and metabolic transcriptomic signatures
Source: eLife. 2023 Jan 30;12:e83138. doi: 10.7554/eLife.83138 (PMC9886280; doi:10.7554/eLife.83138)
Supplement: Figure 3—source data 1. [file elife-83138-fig3-data1.xlsx]

## Sheet: Fig. 3C
		AC-iMSCs									OA-iMSCs
Gene		#7			#14			#15			#2			#5			#8
SOX9	D0	1	1.25	1.339	1	1.136	1.354	1	1.025	1.354	1	1.241	1.364	1	1.354	1.114	1	1.102	1.35
	D7	55.36	60.45	53.347	63.35	58.94	57.992	78.6	61.05	73.559	24.96	19.31	21.68	36.9	30.54	29.34	36.25	39.41	40.12
	D14	89.34	82.64	85.679	115.63	90.75	101.25	119.754	121.54	143.87	32.9	41.36	38.75	55.36	44.87	47.354	55.63	49.24	48.72
	D21	178.36	170.952	181.67	159.36	144.81	138.35	209.711	179.35	170.97	82.36	70.45	74.23	92.64	81.25	85.77	96.87	87.67	89.334
COL2A1	D0	1	1.54	1.61	1	1.002	1.654	1	1.057	1.114	1	0.4512	0.289	1	1.235	1.198	1	1.1	1.008
	D7	51.64	46.34	46.78	68.79	61.25	64.38	57.69	48.24	51.67	28.47	20.4	23.67	37.78	29.25	32.41	33.42	24.78	30.21
	D14	91.64	76.98	79.75	107.38	92.87	90.35	92.74	76.77	86.374	49.987	37.998	44.2	58.67	45.24	50.47	55.34	44.001	47.41
	D21	128.6	111.47	106.99	135.64	122.3	110.04	148.79	122.7	115.41	72.842	60.98	80.4	82.98	64.357	73.81	89.24	70.64	80.55
ACAN	D0	1	1.234	1.069	1	1.304	1.214	1	1.365	1.254	1	1.23	1.009	1	0.234	0.501	1	0.567	1.1
	D7	32.54	26.97	28.74	38.7	27.12	32.4	29.347	22.45	24.36	17.6	14.8	15.5	23.35	16.98	16.24	15.4	11.5	11.7
	D14	52.36	42.21	41.25	59.987	49.97	53.6	47.004	41.35	39.87	26.99	23.68	24.9	31.34	25.34	25.84	34.24	26.98	31.45
	D21	87.34	67.34	79.24	97.34	83.14	86.6	80.36	72.14	65.997	36.84	34.68	33.87	43.65	35.87	38.7	45.78	32.74	37.11
COL10A1	D0	1	1.354	0.984	1	1.201	1.331	1	1.004	1.112	1	1.002	1.745	1	1.23	1.114	1	1.245	1.331
	D7	2.74	3.98	3.2	5.07	3.98	4.12	8.7	6.9	6.2	3.91	3.11	2.9	4.2	2.384	3.33	5.204	4.57	3.009
	D14	11.99	9.57	7.24	14.69	10.05	12.04	17.8	11.54	12.5	8.9	5.99	7.34	11.36	8.72	9.412	12.33	10.24	9.98
	D21	23.97	23.74	18.55	36.9	29.45	29.41	30.24	24.64	26.88	14.54	11.24	14.77	18.74	13.67	14.98	19.87	14.01	15.9
