# Supplementary material for: Differential chondrogenic differentiation between iPSC derived from healthy and OA cartilage is associated with changes in epigenetic regulation and metabolic transcriptomic signatures
Source: eLife. 2023 Jan 30;12:e83138. doi: 10.7554/eLife.83138 (PMC9886280; doi:10.7554/eLife.83138)
Supplement: Figure 4—source data 1. [file elife-83138-fig4-data1.xlsx]

## Sheet: Sheet1
gene_symbol	logFC (NH-D21 vs OA-D21)		AveExpr	t	P.Value	adj.P.Val	B
MTND5P10	2.05132	4.14485	9.25284	18.5307	1.92719e-07	0.000546263	7.963
MT-ND6	1.96446	3.90267	9.25668	18.7723	1.75517e-07	0.000546263	8.04547
AP000769.1	2.12564	4.36397	8.48012	18.9157	1.66134e-07	0.000546263	8.01876
COL1A1	1.8921	3.71175	9.38045	19.452	1.35739e-07	0.000546263	8.2797
PTPRN	-3.068	0.119245	5.02123	-15.1183	8.31995e-07	0.00188663	5.81104
FAT1	1.75063	3.36504	7.15603	13.8946	1.51909e-06	0.00287058	5.94866
CYR61	1.32898	2.51225	9.34939	13.1506	2.24538e-06	0.00363688	5.66096
COL3A1	1.79195	3.46282	6.53201	12.8736	2.61081e-06	0.00370017	5.39605
ALDH1A1	1.75695	3.37982	6.52602	11.8001	4.82398e-06	0.00546943	4.84392
ALDOC	-5.17653	0.0276509	2.3037	-11.8019	4.81893e-06	0.00546943	2.23972
NOS2	-1.50563	0.352176	7.23506	-11.5247	5.69369e-06	0.00586865	4.72971
RP11-309L24.6	1.82065	3.53241	4.89272	8.11153	6.35183e-05	0.0163675	2.33011
NRP1	1.24432	2.36906	6.42566	8.12668	6.27297e-05	0.0163675	2.3781
SCDP1	-0.933967	0.523417	8.82858	-8.12957	6.25806e-05	0.0163675	2.26157
PSAT1	-2.72752	0.150986	3.19728	-8.14173	6.19571e-05	0.0163675	1.82716
THBS1	1.34248	2.53586	6.07329	8.18009	6.0036e-05	0.0163675	2.42937
MTRNR2L1	1.98456	3.95741	4.3353	8.18264	5.99108e-05	0.0163675	2.28936
GPT2	-1.41031	0.37623	6.59111	-8.18463	5.98134e-05	0.0163675	2.42046
MMP2	1.13846	2.20146	6.52183	8.22361	5.79373e-05	0.0163675	2.45466
PTBP2	1.35514	2.55821	5.88632	8.26932	5.5821e-05	0.0163675	2.50141
TRAM1	-1.24141	0.422959	6.08785	-8.33466	5.29452e-05	0.0163675	2.55264
FLNB	-0.901811	0.535214	8.28714	-8.34541	5.24883e-05	0.0163675	2.47408
SERPINE1	-0.757331	0.59159	10.2358	-8.39147	5.05795e-05	0.0163675	2.41276
DNAJB9	-1.42284	0.372977	7.22249	-8.4204	4.94205e-05	0.0163675	2.58843
AC007969.5	0.657905	1.57779	11.977	8.43146	4.89856e-05	0.0163675	2.35151
CHURC1	5.67718	51.1685	1.46538	8.43487	4.88522e-05	0.0163675	0.153584
VEGFA	-1.02904	0.490035	9.69311	-8.45969	4.78942e-05	0.0163675	2.49955
RSPO3	-1.75224	0.29684	4.83144	-8.52705	4.5399e-05	0.0163675	2.6232
RP11-39C10.1	-0.91085	0.531872	8.89633	-8.55659	4.43508e-05	0.0163675	2.6205
SLC6A9	-1.33603	0.39611	6.42859	-8.58004	4.35384e-05	0.0163675	2.74132
CLIC4P1	-1.7387	0.29964	5.11803	-8.67055	4.05556e-05	0.0163675	2.76223
ETV5	-4.05625	0.06011	2.14785	-8.67675	4.03597e-05	0.0163675	1.18131
RSAD2	-1.96099	0.256852	4.50884	-8.77684	3.73422e-05	0.0163675	2.72941
S100A6	0.872314	1.8306	10.7716	8.83107	3.58136e-05	0.0163675	2.75282
MTRNR2L11	1.94824	3.85903	4.64686	8.94228	3.28942e-05	0.0163675	2.86863
ALDH1L2	-1.27655	0.412782	7.35945	-8.95611	3.25502e-05	0.0163675	3.00778
GRIA3	4.68287	25.6854	1.80154	8.96858	3.22435e-05	0.0163675	0.806904
CP	-1.39827	0.379384	6.53232	-9.04201	3.05023e-05	0.0163675	3.0913
SERPINH1	0.965311	1.95248	8.84197	9.06571	2.99631e-05	0.0163675	3.03343
P3H4	1.29712	2.45739	6.6903	9.28243	2.55005e-05	0.0163675	3.26665
SEL1L	-1.0407	0.486092	8.11431	-9.41739	2.31013e-05	0.0163675	3.33093
SERP1	-1.15165	0.450111	7.58534	-9.55658	2.08899e-05	0.0163675	3.44972
C3	-1.17736	0.442158	7.85285	-9.69713	1.88958e-05	0.0163675	3.54406
HSPA5	-0.797008	0.575541	11.593	-9.75128	1.81856e-05	0.0163675	3.43568
ALKBH5	-0.87924	0.543654	8.25431	-8.02291	6.83597e-05	0.0172236	2.19952
AHNAK	0.664953	1.58552	11.0524	7.98206	7.07298e-05	0.0174334	2.0073
TRNP1	1.4669	2.76427	5.3352	7.82622	8.0658e-05	0.01829	2.13841
WFS1	-1.13365	0.455761	7.46502	-7.84389	7.94573e-05	0.01829	2.08758
PKD1	0.999025	1.99865	7.17296	7.85163	7.89376e-05	0.01829	2.11122
ASPN	1.51176	2.85157	5.43135	7.89482	7.61071e-05	0.01829	2.19647
MACF1	0.757393	1.69043	9.32491	7.7182	8.84573e-05	0.0196653	1.86768
ACTA2	2.72551	6.61394	3.80932	7.5249	0.000104617	0.0201042	1.68994
S100A4	1.28563	2.43788	9.80658	7.54238	0.000103027	0.0201042	1.67688
SAA2	-1.05291	0.481994	10.6786	-7.54892	0.000102439	0.0201042	1.63055
EGLN3	-0.809702	0.5705	8.50262	-7.55411	0.000101975	0.0201042	1.76439
ZBTB18	-1.2073	0.433079	5.75014	-7.56736	0.000100802	0.0201042	1.92484
GPR137B	-1.06401	0.478302	6.63832	-7.59016	9.88178e-05	0.0201042	1.91065
RP11-334L9.1	-0.957734	0.514865	9.9331	-7.61827	9.64314e-05	0.0201042	1.74019
SPARC	0.764587	1.69888	9.82692	7.65649	9.32902e-05	0.0201042	1.78188
GLCE	-1.24707	0.421304	6.68119	-7.4622	0.00011055	0.0205478	1.79392
MMP13	-1.49884	0.353837	5.7668	-7.4656	0.000110218	0.0205478	1.8366
KIAA1324L	-1.04384	0.485036	6.62819	-7.39768	0.000117052	0.0214054	1.7386
ITGAV	-0.858514	0.55152	8.21052	-7.2922	0.000128625	0.0220963	1.5373
HK2	-0.814317	0.568678	8.37763	-7.29241	0.000128601	0.0220963	1.52682
ARRB1	-1.72937	0.301584	4.98002	-7.31859	0.000125614	0.0220963	1.70628
HSPA1L	0.766111	1.70068	8.79894	7.34212	0.000122996	0.0220963	1.5481
SMARCA2	0.75201	1.68414	8.83367	7.17547	0.000142951	0.0228278	1.38615
RPSAP23	0.966421	1.95399	7.12274	7.18309	0.000141963	0.0228278	1.50804
SLC4A8	-6.48711	0.0111477	0.527933	-7.20054	0.000139729	0.0228278	-1.39625
TMEM259	0.751201	1.68319	9.47353	7.20258	0.000139471	0.0228278	1.37299
VIM	0.574059	1.48871	12.0398	7.21528	0.000137874	0.0228278	1.22631
ATF7	-1.1029	0.465581	5.91244	-7.09933	0.000153255	0.0234811	1.50389
LMO4	-1.00998	0.496552	6.52631	-7.11072	0.000151661	0.0234811	1.48
ETFB	1.07279	2.10349	6.49231	7.12527	0.000149654	0.0234811	1.49575
SPTBN1	0.665658	1.58629	9.8258	6.99654	0.000168509	0.0254741	1.14821
ALDH18A1	-0.923465	0.527241	6.944	-6.96978	0.000172753	0.025772	1.31729
NRAP	0.943244	1.92285	6.8788	6.85174	0.00019296	0.026045	1.20749
SIX1	1.35779	2.56293	5.05424	6.85333	0.000192672	0.026045	1.30097
SQSTM1	0.677732	1.59962	10.6236	6.86641	0.000190311	0.026045	0.965859
SLC3A2	-0.789434	0.578571	8.01718	-6.86692	0.000190219	0.026045	1.13711
GADD45A	-1.38844	0.381978	6.754	-6.87432	0.000188899	0.026045	1.23876
GYS1	-0.820135	0.566389	7.58762	-6.89904	0.000184562	0.026045	1.20006
MTHFD2P7	-1.63377	0.322244	4.38278	-6.9146	0.000181888	0.026045	1.3227
FTL	0.596686	1.51224	13.798	6.91638	0.000181587	0.026045	0.831227
GTPBP2	-1.26954	0.414792	6.86036	-6.82888	0.000197173	0.0263005	1.18649
TRIM46	-2.34778	0.196449	3.02234	-6.79684	0.000203249	0.0264878	0.892144
AGPAT3	0.905013	1.87256	7.55548	6.79987	0.000202664	0.0264878	1.1042
SNTA1	0.763452	1.69755	8.19641	6.70459	0.000221946	0.0264887	0.960919
CBR1	1.15637	2.22896	5.4995	6.7154	0.000219658	0.0264887	1.16371
NPTXR	-1.32516	0.399105	5.60112	-6.72226	0.000218221	0.0264887	1.16571
FAM214A	1.17764	2.26207	5.44342	6.7333	0.000215927	0.0264887	1.18282
SPECC1L	-1.33032	0.397681	5.22484	-6.73726	0.000215114	0.0264887	1.19281
HSP90B1	-0.577985	0.669899	11.1367	-6.73926	0.000214703	0.0264887	0.802106
FAM117B	-1.03778	0.487077	5.96396	-6.74762	0.000212995	0.0264887	1.17001
HSPA4L	-0.756666	0.591863	8.02789	-6.74871	0.000212773	0.0264887	1.01781
SOX9	-1.25968	0.417638	5.60367	-6.62627	0.000239334	0.0276895	1.07356
BLOC1S1	1.00204	2.00283	6.30952	6.63181	0.000238056	0.0276895	1.03321
PRDX1	0.598251	1.51388	11.1542	6.6407	0.000236019	0.0276895	0.69838
RP11-416L21.2	0.872024	1.83023	7.74474	6.59308	0.00024716	0.028306	0.880581
NPR2	0.868389	1.82562	7.04596	6.58171	0.000249904	0.0283341	0.92535
MTRNR2L10	1.4243	2.68385	5.41733	6.53749	0.000260911	0.0284443	0.996741
GNPNAT1	-1.18128	0.440962	5.38131	-6.54063	0.000260111	0.0284443	1.00136
ANAPC2	1.2208	2.33075	5.10454	6.55579	0.000256291	0.0284443	1.02465
ILVBL	0.832392	1.78063	7.45545	6.5571	0.000255965	0.0284443	0.866537
MARCKSL1	1.15448	2.22605	5.51814	6.51209	0.000267476	0.0288823	0.967183
HSPA8	0.514832	1.42883	11.7326	6.43266	0.000289228	0.0309365	0.440075
MT2A	-0.738863	0.599211	7.68318	-6.36216	0.000310199	0.0311242	0.645457
ANKFY1	-1.02741	0.490591	6.12022	-6.3639	0.000309662	0.0311242	0.778397
PDK1	-0.899102	0.53622	6.46799	-6.36944	0.000307956	0.0311242	0.755968
ADGRL2	1.30121	2.46435	5.22545	6.37366	0.000306667	0.0311242	0.845351
MGAM	1.34575	2.54163	4.82895	6.37486	0.0003063	0.0311242	0.855788
SLC7A5	-1.56733	0.337433	6.75992	-6.37862	0.000305155	0.0311242	0.741088
MRPL54	0.983276	1.97695	6.41513	6.37929	0.000304953	0.0311242	0.770416
RBPJ	-0.758752	0.591008	7.68472	-6.34773	0.000314697	0.0312985	0.630112
LMNA	0.55835	1.47258	10.3994	6.33599	0.000318411	0.0313926	0.424635
S100A10	0.615605	1.5322	9.80567	6.29931	0.000330328	0.0314728	0.425478
LDB1	0.69723	1.62139	8.24751	6.30602	0.000328112	0.0314728	0.541714
EAF1	-1.22032	0.429189	4.97382	-6.3102	0.000326741	0.0314728	0.791396
GAPDHP65	0.718204	1.64513	12.0157	6.32257	0.000322716	0.0314728	0.30271
NEXN	0.962763	1.94904	6.55019	6.25818	0.000344291	0.0314804	0.633642
SH3PXD2B	-1.19237	0.437584	5.15456	-6.2638	0.000342346	0.0314804	0.739938
SCARF2	0.953853	1.93704	7.12119	6.26517	0.000341873	0.0314804	0.590998
COL6A1	-1.19573	0.436565	5.55107	-6.27448	0.00033868	0.0314804	0.729322
MYLK3	1.05166	2.07291	6.4488	6.28359	0.00033559	0.0314804	0.668775
VCAM1	0.949818	1.93163	6.24379	6.23774	0.000351474	0.0316271	0.638334
PDIA6	-0.672699	0.627332	8.8435	-6.2392	0.000350955	0.0316271	0.426712
CALU	-0.638738	0.642274	9.42215	-6.1729	0.00037538	0.0320004	0.314236
POLR3B	-1.50609	0.352064	4.14747	-6.17909	0.000373021	0.0320004	0.649375
ATF6	-0.879344	0.543615	6.4385	-6.18281	0.000371613	0.0320004	0.564194
DESI2	-1.03812	0.486961	5.65636	-6.18888	0.000369325	0.0320004	0.634917
DAB2	-1.01774	0.49389	6.06968	-6.20191	0.000364467	0.0320004	0.61566
PDIA4	-0.693789	0.618228	8.24997	-6.20654	0.000362758	0.0320004	0.434642
SEPP1	1.00678	2.00942	6.0088	6.2162	0.000359223	0.0320004	0.635549
NENF	0.93515	1.91209	7.6236	6.15508	0.000382264	0.0323441	0.429421
HR	-2.2425	0.21132	3.71415	-6.13692	0.000389427	0.0327061	0.562561
DUSP4	-0.849668	0.554912	6.48629	-6.11009	0.00040028	0.0331268	0.482977
HSP90B2P	-0.680727	0.623851	7.97592	-6.11048	0.000400119	0.0331268	0.351935
MBD3	0.739491	1.66959	7.90876	6.09306	0.000407347	0.0334674	0.33834
ITPK1	-1.11038	0.463173	5.25816	-6.0829	0.000411625	0.0335755	0.552632
FGFR2	1.52338	2.87464	5.58911	6.03898	0.000430714	0.0339128	0.484739
SLIT2	-1.51217	0.350585	4.87654	-6.04191	0.000429412	0.0339128	0.528424
MCM4	0.740498	1.67075	7.99135	6.04802	0.000426704	0.0339128	0.282296
HIRA	0.905091	1.87266	6.99441	6.04883	0.00042635	0.0339128	0.370879
AC005014.5	-1.36854	0.387283	4.3707	-6.05347	0.00042431	0.0339128	0.541625
CTSF	1.16507	2.24245	5.1766	6.01224	0.000442816	0.0339233	0.484877
FKTN	-2.20735	0.216532	2.79217	-6.01326	0.000442347	0.0339233	0.219244
PPIC	2.80181	6.97316	2.46709	6.02446	0.00043724	0.0339233	0.0793093
HYOU1	-1.58206	0.334005	5.59026	-6.03042	0.000434549	0.0339233	0.475704
LAMA5	-0.90927	0.532455	6.25666	-5.9966	0.000450069	0.0340193	0.382353
44448	-0.817491	0.567428	7.01893	-6.00035	0.00044832	0.0340193	0.315904
CTGF	0.576958	1.4917	10.0482	5.94822	0.000473361	0.0344036	0.02068
RAB31	-0.857058	0.552077	6.55777	-5.94883	0.000473061	0.0344036	0.302929
ANXA8L1	-0.92455	0.526845	6.88682	-5.95099	0.000471993	0.0344036	0.274376
NOMO2	-1.02671	0.490828	5.86627	-5.95944	0.000467843	0.0344036	0.37779
CCDC80	0.978831	1.97087	5.6695	5.96409	0.000465578	0.0344036	0.399614
TNC	1.92018	3.7847	3.96626	5.96666	0.000464331	0.0344036	0.436298
TNPO1P3	-1.42786	0.371681	4.62076	-5.93395	0.000480486	0.0344794	0.425524
FGD3	1.40701	2.65188	5.00121	5.9341	0.000480409	0.0344794	0.4137
PTK2B	-2.41951	0.186919	3.7544	-5.90765	0.000493927	0.0352211	0.359736
SPTAN1	0.659619	1.57967	9.15497	5.8911	0.0005026	0.0353943	0.0194738
ACSBG1	-2.13025	0.228419	4.34533	-5.89424	0.000500943	0.0353943	0.385336
FAM133B	1.51381	2.85563	3.96514	5.83552	0.00053299	0.0355473	0.311353
TUBB4BP7	0.927045	1.90138	7.05568	5.83722	0.000532029	0.0355473	0.132572
EVA1B	1.88563	3.69514	4.12861	5.84015	0.000530381	0.0355473	0.325345
CHAC1	-1.28611	0.410054	5.38847	-5.84315	0.0005287	0.0355473	0.293768
SNX25P1	-6.69971	0.00962024	-0.234366	-5.84478	0.000527788	0.0355473	-2.43961
PCBP4	0.707895	1.63342	7.35296	5.85727	0.000520863	0.0355473	0.126573
ITSN1	1.00774	2.01077	5.99126	5.8582	0.00052035	0.0355473	0.257511
SDF2L1	-1.06659	0.477445	6.85112	-5.86011	0.000519298	0.0355473	0.177696
RAB8B	-1.36583	0.388012	4.25219	-5.87322	0.000512161	0.0355473	0.362385
CD164	-0.644128	0.63988	8.09291	-5.82287	0.000540188	0.0358166	0.0229192
CBFB	-0.76659	0.587805	7.33714	-5.77853	0.000566288	0.0364806	0.0397193
AL513412.1	-6.2956	0.0127302	0.283504	-5.77854	0.000566281	0.0364806	-2.00147
USP25	-0.87916	0.543684	6.4757	-5.78846	0.000560322	0.0364806	0.13455
R3HDM2P2	1.04719	2.06651	5.84378	5.78912	0.00055993	0.0364806	0.196199
PTMS	0.796027	1.73631	7.61582	5.79374	0.000557183	0.0364806	0.030987
SPTY2D1	-1.59425	0.331193	3.85067	-5.7571	0.0005794	0.0364958	0.227026
CDC34	0.601747	1.51755	8.58437	5.75912	0.000578148	0.0364958	-0.0886268
PRDM1	-4.65906	0.0395807	0.734756	-5.7607	0.000577174	0.0364958	-1.57722
TIAM1	-0.799998	0.57435	6.86759	-5.76352	0.00057544	0.0364958	0.0684936
TPST2	0.82323	1.76936	6.89589	5.73574	0.000592804	0.0367279	0.0345217
RP11-249C24.12	-0.839455	0.558854	8.27602	-5.74027	0.000589933	0.0367279	-0.086013
MIF	0.519366	1.43333	11.3047	5.74118	0.000589361	0.0367279	-0.304681
RP11-321N4.5	-6.72554	0.00944955	-0.21676	-5.7293	0.000596917	0.0367817	-2.45048
EBF3	0.922368	1.89522	5.82442	5.72315	0.000600871	0.0368253	0.125827
C9orf72	-1.04045	0.486177	5.82633	-5.71141	0.0006085	0.0370923	0.11273
ZFPM2	1.90063	3.73376	3.37758	5.69814	0.000617253	0.0374246	0.111976
ARHGEF11	-0.720539	0.606871	7.05286	-5.6246	0.000668364	0.0375144	-0.107255
OTUD7B	0.687908	1.61095	7.52148	5.62694	0.000666664	0.0375144	-0.15046
ARAP2	-1.10893	0.463639	4.87814	-5.62977	0.000664621	0.0375144	0.101085
KMT2D	0.677288	1.59913	7.54826	5.63352	0.000661918	0.0375144	-0.145409
ANK2	-1.20154	0.434811	5.64581	-5.63441	0.00066128	0.0375144	0.0451009
POSTN	1.20067	2.29847	5.78875	5.63665	0.000659674	0.0375144	0.033705
MGAT5	-0.952174	0.516853	5.59809	-5.63835	0.00065846	0.0375144	0.0539278
PPARD	-0.912849	0.531135	6.07802	-5.64725	0.000652135	0.0375144	0.0165875
H3F3B	0.563272	1.47762	9.34194	5.65168	0.000649013	0.0375144	-0.268861
EGLN1	-0.555685	0.680334	9.41066	-5.65558	0.000646281	0.0375144	-0.269347
SELP	-0.779608	0.582525	7.64813	-5.6574	0.000645008	0.0375144	-0.127181
ID3	0.630133	1.54771	8.89486	5.67342	0.000633929	0.0375144	-0.210677
ANXA1	0.513736	1.42774	10.7729	5.67718	0.00063136	0.0375144	-0.342088
RP11-231C14.6	2.06934	4.19695	2.98332	5.68302	0.000627396	0.0375144	0.0114128
TJP1	-0.653219	0.63586	8.34617	-5.69088	0.000622097	0.0375144	-0.148395
FNBP1L	-0.707399	0.612423	7.13398	-5.59006	0.000693975	0.0380111	-0.155075
VCP	0.498176	1.41243	10.3633	5.59363	0.000691275	0.0380111	-0.41091
CSRP2	1.6017	3.035	5.45662	5.59367	0.000691245	0.0380111	0.0176961
DESI1	-0.738773	0.599249	6.84757	-5.60186	0.000685106	0.0380111	-0.112579
NMNAT2	-1.32059	0.400372	4.4858	-5.6043	0.000683289	0.0380111	0.0901521
BORCS8	1.05831	2.08248	5.88507	5.56999	0.000709359	0.0382986	-0.0504305
PLCE1	1.67491	3.193	3.43131	5.57204	0.000707767	0.0382986	0.00332195
FAM102B	-1.16534	0.445859	6.40806	-5.57483	0.000705616	0.0382986	-0.0987168
MMP14	0.53265	1.44658	9.7277	5.56556	0.000712805	0.0383023	-0.397933
C15orf59	1.06354	2.09005	5.96736	5.5612	0.000716209	0.0383037	-0.068721
NARS	-0.720557	0.606863	7.6572	-5.53544	0.000736728	0.0390328	-0.269177
EIF5	-0.61388	0.653437	8.9124	-5.53546	0.000736709	0.0390328	-0.373202
EPHB6	1.58879	3.00797	4.09622	5.52131	0.000748255	0.0394591	0.00511617
ESYT1	-1.0376	0.487136	5.53821	-5.48733	0.000776815	0.0394956	-0.108374
ARHGAP24	1.96681	3.90903	3.46776	5.48892	0.000775448	0.0394956	-0.0709602
GSTP1	0.581245	1.49614	9.64585	5.49142	0.000773316	0.0394956	-0.479744
MTM1	-1.17575	0.442654	4.82032	-5.49497	0.000770293	0.0394956	-0.0406214
MAGT1	-0.84175	0.557966	6.20284	-5.50005	0.000765984	0.0394956	-0.162792
CTSA	0.49303	1.4074	10.2507	5.50475	0.000762023	0.0394956	-0.508076
MOB1A	-1.00781	0.497301	6.47859	-5.50723	0.000759945	0.0394956	-0.183299
SCAND1	0.806037	1.7484	6.87611	5.50757	0.000759659	0.0394956	-0.223984
DDX6	-0.64103	0.641255	7.78872	-5.47877	0.000784199	0.0395166	-0.34762
LOXL1	0.783488	1.72129	7.32862	5.48176	0.000781607	0.0395166	-0.300223
MME	1.29976	2.46188	4.1601	5.45646	0.000803803	0.039797	-0.0610819
BCAP31	0.609897	1.52615	8.02925	5.45853	0.000801964	0.039797	-0.392898
TEF	0.909442	1.87832	6.22136	5.46102	0.000799755	0.039797	-0.209527
GGT7	-1.14563	0.451993	5.38667	-5.46746	0.000794071	0.039797	-0.116105
LPIN2	-0.935701	0.522788	5.60651	-5.43383	0.000824253	0.0404562	-0.175638
EMP3	0.708642	1.63426	6.89391	5.4356	0.000822634	0.0404562	-0.309565
SRSF11	0.635525	1.5535	7.75548	5.39768	0.000858117	0.0405389	-0.440421
ANO3	2.60125	6.06812	2.2474	5.39972	0.000856168	0.0405389	-0.498961
ZFX	0.75734	1.69037	6.62562	5.40423	0.00085187	0.0405389	-0.31802
IFRD1	-0.682518	0.623077	7.81585	-5.4048	0.000851326	0.0405389	-0.437459
ACSL4	-0.739549	0.598927	6.92525	-5.40602	0.000850172	0.0405389	-0.347505
VAMP8	0.880542	1.84107	6.82247	5.40729	0.000848967	0.0405389	-0.33523
SNX10	-1.08058	0.47284	5.23427	-5.40813	0.000848174	0.0405389	-0.168492
AMY2B	3.63861	12.4546	3.45874	5.41068	0.000845763	0.0405389	-0.147773
FLNC	0.564661	1.47904	8.62527	5.42073	0.000836346	0.0405389	-0.487138
XPR1	-0.7059	0.61306	6.90865	-5.36452	0.000890544	0.0410447	-0.394574
SEMA3C	-0.897083	0.536971	6.3974	-5.36499	0.000890073	0.0410447	-0.339636
TENM4	-1.52762	0.346849	6.32304	-5.37004	0.000885051	0.0410447	-0.325726
PCF11	0.716496	1.64319	7.27918	5.37249	0.000882626	0.0410447	-0.423858
NT5C2	0.81942	1.7647	6.15173	5.37708	0.000878103	0.0410447	-0.298955
ENSA	-0.752927	0.593398	6.53377	-5.37928	0.000875949	0.0410447	-0.337494
AC022182.2	1.20083	2.29872	4.67966	5.35176	0.000903377	0.0414676	-0.188543
LRP8	-0.960037	0.514044	5.42915	-5.27849	0.000981177	0.0419796	-0.33483
RPSAP25	-0.647505	0.638383	7.92982	-5.27961	0.000979927	0.0419796	-0.597675
LUC7L3	0.714764	1.64121	7.08831	5.28347	0.000975661	0.0419796	-0.509841
OSBPL8	-0.941985	0.520516	6.28261	-5.28671	0.000972083	0.0419796	-0.418954
RPL14	1.15232	2.22271	4.52471	5.28738	0.000971353	0.0419796	-0.250806
SEC63	-0.63383	0.644463	7.84726	-5.29106	0.000967317	0.0419796	-0.576315
PRDM5	1.20754	2.30944	4.80626	5.29227	0.000965996	0.0419796	-0.262753
MEF2C	-1.8389	0.279534	2.92054	-5.29963	0.000957994	0.0419796	-0.345274
RPL12P2	-6.38544	0.0119617	-0.391154	-5.30126	0.000956228	0.0419796	-2.68537
MTRNR2L12	1.6725	3.18767	4.63746	5.30129	0.000956204	0.0419796	-0.241625
HNRNPDL	0.600823	1.51658	8.23836	5.30149	0.000955988	0.0419796	-0.598509
LARS	-0.627286	0.647393	7.62106	-5.30954	0.000947332	0.0419796	-0.532916
YRDC	-1.26268	0.416769	4.42892	-5.31093	0.00094585	0.0419796	-0.220778
LGALS1	0.527601	1.44153	9.80907	5.31546	0.000941033	0.0419796	-0.703346
EDEM1	-0.691095	0.619383	7.27353	-5.32395	0.000932074	0.0419796	-0.480948
PABPC1	-0.427893	0.743347	12.4349	-5.32641	0.0009295	0.0419796	-0.876042
STC1	-3.57562	0.0838745	2.58741	-5.32958	0.000926184	0.0419796	-0.413613
MTRNR2L6	1.29927	2.46104	4.79894	5.33609	0.000919424	0.0419796	-0.213481
FADS1	-1.30677	0.404226	4.28294	-5.27118	0.000989326	0.0421691	-0.259115
ASNS	-0.729466	0.603127	7.71752	-5.26459	0.00099675	0.0423264	-0.596137
DHCR24	-0.725154	0.604933	6.95976	-5.25968	0.00100232	0.0424041	-0.524583
FEM1B	-0.97561	0.508525	5.39083	-5.2537	0.00100915	0.0425344	-0.35938
LARP4	-0.864992	0.54905	5.69899	-5.22944	0.00103738	0.0427702	-0.420829
PSAT1P1	-0.934339	0.523282	5.66924	-5.23211	0.00103423	0.0427702	-0.41438
MTCO1P53	1.88021	3.68128	2.95545	5.23248	0.00103379	0.0427702	-0.399673
WARS	-1.21042	0.432144	5.50301	-5.23317	0.00103298	0.0427702	-0.394949
CALM1	-0.545621	0.685097	9.77123	-5.23516	0.00103065	0.0427702	-0.798576
DMPK	-1.04046	0.486173	6.22837	-5.24465	0.00101958	0.0427702	-0.462642
ATRX	0.607886	1.52402	7.9258	5.22145	0.00104687	0.0428497	-0.667729
CTA-714B7.4	0.787827	1.72647	6.38975	5.22262	0.00104548	0.0428497	-0.506733
ZNF585B	1.81797	3.52586	2.95304	5.19881	0.00107428	0.0430396	-0.431722
EFR3A	-0.605666	0.657168	7.66205	-5.1992	0.0010738	0.0430396	-0.669988
WBSCR17	-1.16538	0.445848	5.06749	-5.20026	0.0010725	0.0430396	-0.388685
NECAP1	-2.00765	0.248678	2.81381	-5.20553	0.00106606	0.0430396	-0.456818
ERC1	-1.05096	0.482648	5.21993	-5.2063	0.00106512	0.0430396	-0.396568
ARVCF	0.872385	1.83069	6.15176	5.21159	0.00105872	0.0430396	-0.493109
SETD2	0.705173	1.63034	6.95501	5.19329	0.00108108	0.0431596	-0.603798
ARL8B	-0.619371	0.650955	7.94782	-5.18909	0.0010863	0.0432156	-0.709125
PLPP1	0.658391	1.57832	7.06504	5.18358	0.00109316	0.0433367	-0.627387
GNA12	-0.96028	0.513957	5.19542	-5.17881	0.00109916	0.0434224	-0.425825
SEC24C	-0.678252	0.624922	7.63467	-5.17422	0.00110495	0.0434998	-0.697759
GARS	-0.762682	0.5894	7.90599	-5.16612	0.00111527	0.0436033	-0.733361
U2AF1L5	0.6594	1.57943	7.08381	5.16698	0.00111417	0.0436033	-0.649522
PCSK6	1.48246	2.79426	3.63668	5.1563	0.00112792	0.0437956	-0.388541
OTUB2	-1.48369	0.357574	3.72947	-5.15662	0.00112751	0.0437956	-0.383864
GNPDA2	-1.13906	0.454054	4.59338	-5.15287	0.00113238	0.0438187	-0.404239
GFPT1	-1.08314	0.471999	6.06382	-5.14052	0.00114858	0.0442946	-0.56767
OGN	1.27413	2.41853	4.1903	5.12673	0.00116698	0.0447001	-0.414092
SYT7	-0.895906	0.537409	5.60492	-5.12687	0.00116678	0.0447001	-0.530755
GBE1	-0.660441	0.632685	7.22783	-5.10735	0.00119338	0.044803	-0.737606
RNF126P1	0.842346	1.79296	6.91067	5.1084	0.00119193	0.044803	-0.701783
BAX	0.705952	1.63122	7.71691	5.10875	0.00119146	0.044803	-0.785873
DDAH1	-1.09461	0.468263	4.86221	-5.11025	0.00118939	0.044803	-0.473329
EPHX1	0.553148	1.46728	8.60013	5.11368	0.00118468	0.044803	-0.858055
CALR	-0.531835	0.691674	9.0986	-5.11822	0.0011785	0.044803	-0.891824
CPOX	-1.63646	0.321644	3.63647	-5.09522	0.00121024	0.0451371	-0.452287
HDAC4	-1.13522	0.455265	4.64945	-5.09787	0.00120654	0.0451371	-0.470367
TTLL7	-1.0265	0.490899	5.46928	-5.09194	0.00121485	0.0451607	-0.55666
PDZD8	-0.775872	0.584036	6.15775	-5.08505	0.00122459	0.045226	-0.645071
ELOVL7	-2.50177	0.17656	2.1104	-5.08536	0.00122415	0.045226	-0.814154
CCDC85B	0.75666	1.68958	7.18202	5.0781	0.00123449	0.0452965	-0.768511
GSN	0.645999	1.56482	8.13711	5.07957	0.00123239	0.0452965	-0.860838
ARL1	-0.637707	0.642734	7.49242	-5.07226	0.00124288	0.0454574	-0.808479
FUS	0.630466	1.54806	8.16095	5.05402	0.00126952	0.0462822	-0.894673
LCORL	-1.03589	0.487715	4.94216	-5.03854	0.0012926	0.0465253	-0.563616
HSPA8P14	0.556533	1.47073	8.50689	5.04016	0.00129016	0.0465253	-0.941735
IGFBP7	0.566508	1.48093	9.35984	5.04278	0.00128623	0.0465253	-1.00591
FAM69B	1.26807	2.40839	4.51248	5.04659	0.00128053	0.0465253	-0.519108
PARD6B	1.69645	3.24103	3.1506	5.01297	0.00133177	0.0467479	-0.579113
BIRC6	0.577471	1.49223	8.06576	5.01325	0.00133132	0.0467479	-0.936826
GAS8	0.785182	1.72331	5.90386	5.01461	0.00132921	0.0467479	-0.700076
IQGAP1	-0.546245	0.6848	9.25591	-5.01511	0.00132844	0.0467479	-1.03264
NPAS3	2.40115	5.28223	2.04036	5.01573	0.00132748	0.0467479	-0.904648
44261	-0.882641	0.542374	6.98292	-5.01736	0.00132495	0.0467479	-0.821378
PMP22	0.644201	1.56287	7.23374	5.01893	0.00132253	0.0467479	-0.846994
PTGER1	1.39098	2.62257	3.69771	5.02528	0.00131274	0.0467479	-0.523922
ACTR2	-0.651158	0.636769	7.72823	-4.97917	0.00138555	0.0480409	-0.947533
DRP2	-6.15864	0.013998	-0.501381	-4.97981	0.00138452	0.0480409	-2.84215
IFITM2	0.676455	1.59821	9.53583	4.98086	0.00138281	0.0480409	-1.09726
POTEJ	0.665283	1.58588	7.05744	4.98661	0.00137351	0.0480409	-0.867621
P3H3	0.77809	1.71486	6.17933	4.97094	0.001399	0.0483594	-0.786191
MAF	0.847313	1.79915	5.73579	4.96428	0.00141	0.0485915	-0.740684
PFKL	0.445614	1.36189	10.5358	4.96018	0.00141683	0.0486787	-1.19917
UNC5B	-0.576881	0.670412	8.18332	-4.95754	0.00142122	0.0486823	-1.01722
SSBP2	0.862233	1.81785	6.09594	4.95067	0.00143277	0.0489299	-0.800982
LSM7	0.680822	1.60305	7.25717	4.93763	0.00145497	0.0489508	-0.950601
RCN2	0.60562	1.52163	7.99925	4.93817	0.00145404	0.0489508	-1.02471
ELF1	-1.51798	0.349175	5.07441	-4.93913	0.00145239	0.0489508	-0.694018
AHI1	-1.45018	0.365975	3.57301	-4.94147	0.0014484	0.0489508	-0.617837
PPM1D	1.19346	2.28701	4.12405	4.94397	0.00144413	0.0489508	-0.614939
HINT1P2	0.820705	1.76627	7.14742	4.88096	0.00155592	0.0490028	-1.00948
SRPRA	-0.596159	0.661513	8.28207	-4.88101	0.00155582	0.0490028	-1.12261
CANX	-0.444564	0.734807	10.0431	-4.88417	0.00155	0.0490028	-1.25888
DIRC2	0.794501	1.73448	6.15894	4.88655	0.00154562	0.0490028	-0.887469
PTBP3	-0.71208	0.61044	6.71638	-4.88665	0.00154544	0.0490028	-0.953208
CPNE3	-1.03197	0.489043	4.98082	-4.89039	0.00153859	0.0490028	-0.742013
ACTB	0.542742	1.45674	8.57724	4.89341	0.0015331	0.0490028	-1.13219
ADSSL1	-0.808629	0.570924	6.44253	-4.89376	0.00153246	0.0490028	-0.912472
C6orf62	-0.535824	0.689764	8.12447	-4.89468	0.00153078	0.0490028	-1.09112
SFPQ	0.509232	1.42329	8.66924	4.8949	0.00153038	0.0490028	-1.13792
BZW1P2	-1.15765	0.448242	5.2711	-4.89748	0.00152571	0.0490028	-0.765938
TNKS2	-0.649102	0.637677	8.51926	-4.89833	0.00152418	0.0490028	-1.12114
UBA3	-0.614682	0.653074	7.43273	-4.90149	0.00151848	0.0490028	-1.01483
VIL1	1.5689	2.96678	3.24972	4.90369	0.00151452	0.0490028	-0.679236
WDTC1	-0.660378	0.632713	6.93536	-4.90689	0.0015088	0.0490028	-0.953074
IGSF9B	-6.09716	0.0146074	-0.532864	-4.90692	0.00150874	0.0490028	-2.88167
WIPF2	-1.55472	0.340394	3.44904	-4.90916	0.00150475	0.0490028	-0.658312
LRPAP1	0.672439	1.59376	7.01206	4.91399	0.00149617	0.0490028	-0.95289
UBB	0.496056	1.41035	10.357	4.91692	0.00149099	0.0490028	-1.24082
RAP1BP1	-1.07027	0.476229	4.87722	-4.92257	0.00148107	0.0490028	-0.69321
SPPL2B	1.00404	2.00561	5.0534	4.92349	0.00147947	0.0490028	-0.71034
GCLC	0.499389	1.41361	9.66323	4.92596	0.00147515	0.0490028	-1.17656
ARHGAP35	-0.66437	0.630964	6.87393	-4.93034	0.00146755	0.0490028	-0.91685
OLFML3	0.55691	1.47111	8.12264	4.8755	0.00156605	0.0490493	-1.11525
KLF2P4	-5.71106	0.0190897	-0.00591359	-4.87765	0.00156204	0.0490493	-2.52115
SUPT16HP1	-2.04583	0.242182	2.92759	-4.85678	0.00160133	0.049742	-0.767522
TBC1D1	-0.893482	0.538313	6.04725	-4.85797	0.00159906	0.049742	-0.909169
CHST11	-0.601121	0.659241	7.5174	-4.86015	0.0015949	0.049742	-1.07578
PHLDA3	0.699925	1.62442	7.69334	4.84849	0.00161721	0.0500982	-1.1085
HNRNPA2B1	0.472637	1.38764	10.1028	4.82934	0.00165461	0.0511171	-1.3338
RHOQ	-0.679919	0.6242	7.59368	-4.81061	0.00169213	0.052134	-1.14659
ARHGEF40	0.781049	1.71838	6.27833	4.80143	0.00171084	0.0521437	-1.00791
ATP5L	0.783728	1.72157	6.70669	4.80226	0.00170913	0.0521437	-1.05793
HOXA10	0.762301	1.69619	6.59448	4.80507	0.00170339	0.0521437	-1.04118
AC006026.9	-1.5687	0.337112	3.37326	-4.807	0.00169944	0.0521437	-0.77145
LRIG1	-0.692004	0.618993	6.2553	-4.78354	0.00174797	0.0531326	-1.02752
HNRNPH1	0.667214	1.588	7.57222	4.7788	0.00175797	0.0531516	-1.1849
FRMD6	-0.848362	0.555415	5.43531	-4.77944	0.00175661	0.0531516	-0.929305
PRRC2B	-0.59405	0.662481	7.67453	-4.76811	0.00178073	0.0536966	-1.20902
WDFY3	0.716805	1.64354	6.42601	4.76579	0.0017857	0.0537035	-1.0706
NR2F2	0.65826	1.57818	6.84208	4.76135	0.00179528	0.0537068	-1.12556
ERLIN1	-0.837524	0.559603	5.41461	-4.76287	0.00179199	0.0537068	-0.947095
GLG1	-0.475324	0.719305	9.15958	-4.75885	0.00180071	0.0537275	-1.35167
ARFGEF3	-1.61452	0.326573	3.37006	-4.74496	0.00183112	0.0537856	-0.838235
FNDC3A	-0.694988	0.617715	6.96485	-4.74562	0.00182967	0.0537856	-1.15988
EIF2S2P4	-0.583272	0.667448	8.16296	-4.74709	0.00182641	0.0537856	-1.28308
MTCO1P25	2.35132	5.10292	2.01548	4.7505	0.00181892	0.0537856	-1.1333
FAM60A	-0.735266	0.600707	6.09963	-4.7534	0.00181257	0.0537856	-1.04597
ECH1	0.740852	1.67116	6.15803	4.75508	0.00180891	0.0537856	-1.05117
SCX	0.836767	1.78604	5.88761	4.72268	0.00188111	0.0539949	-1.05749
KHK	1.48714	2.80334	3.95676	4.72326	0.00187979	0.0539949	-0.859341
AL513122.2	0.540027	1.454	10.1516	4.72447	0.00187704	0.0539949	-1.47341
RNF149	-0.79363	0.576891	5.63078	-4.72613	0.00187327	0.0539949	-1.01998
OAZ1	0.606592	1.52266	10.5844	4.72763	0.00186988	0.0539949	-1.50228
SERPINH1P1	0.79902	1.73992	5.8436	4.73157	0.00186098	0.0539949	-1.04064
LYAR	-2.13696	0.227358	2.24227	-4.73374	0.00185611	0.0539949	-1.05529
GAPDHP63	0.539887	1.45386	10.4666	4.73539	0.00185241	0.0539949	-1.48322
EMP2	1.90077	3.73413	2.67164	4.73684	0.00184916	0.0539949	-0.932646
ABR	-0.658064	0.633728	6.78872	-4.71858	0.00189048	0.0541268	-1.1737
SOCS3	-1.18885	0.438653	4.60696	-4.70921	0.00191208	0.0546075	-0.920685
PHYH	-1.98548	0.252529	3.44822	-4.70399	0.00192421	0.0548159	-0.879439
IGF2R	0.529425	1.44335	8.07438	4.70018	0.00193313	0.054932	-1.33542
MPDZ	0.720384	1.64762	6.69329	4.69811	0.00193799	0.0549323	-1.18847
UQCRFS1P1	0.75346	1.68583	6.01435	4.69073	0.00195545	0.0550147	-1.11401
TUBA4A	0.678533	1.60051	8.12827	4.69121	0.0019543	0.0550147	-1.35204
AC019109.1	1.11383	2.16419	4.18249	4.69267	0.00195085	0.0550147	-0.906072
BIN1	0.759464	1.69286	5.9851	4.68617	0.00196632	0.0551835	-1.11596
CRTC1	-1.32546	0.399023	3.77253	-4.67866	0.00198436	0.0555524	-0.905334
DOCK5	-0.716152	0.608719	6.20243	-4.67101	0.00200292	0.0559338	-1.16302
TTC9	-1.38349	0.383289	3.87126	-4.66815	0.00200993	0.0559916	-0.9197
EPS8	-0.915073	0.530317	5.67407	-4.66488	0.00201793	0.0560768	-1.10219
PSRC1	1.46684	2.76416	3.79692	4.65846	0.00203381	0.0563799	-0.928815
HSPA9	-0.444172	0.735006	9.823	-4.65089	0.00205269	0.0567644	-1.54427
TARDBP	0.556642	1.47084	8.17282	4.63777	0.00208586	0.0574017	-1.4257
DYSF	0.630416	1.54801	7.10427	4.63805	0.00208515	0.0574017	-1.31406
PRR7	1.51918	2.86627	4.48102	4.63294	0.00209822	0.0574627	-1.00044
GLRX3	0.53949	1.45346	8.01374	4.63369	0.00209628	0.0574627	-1.41601
ATP6V0B	0.64366	1.56229	8.61256	4.62266	0.0021248	0.0577721	-1.48431
SPCS3	-1.36225	0.388974	5.30372	-4.6227	0.00212469	0.0577721	-1.10695
UBA52	0.441064	1.35761	10.3353	4.62401	0.0021213	0.0577721	-1.61923
CDK15	1.74594	3.35414	2.82658	4.61952	0.00213299	0.0578562	-1.02277
GOT1	-0.613961	0.6534	6.84762	-4.61223	0.00215213	0.058236	-1.3172
USP34	0.545682	1.45971	8.29855	4.60714	0.00216563	0.0584616	-1.47722
ME2	-0.765904	0.588085	5.98893	-4.60423	0.00217338	0.0585314	-1.22043
STK36	1.82451	3.54186	2.69283	4.59647	0.0021942	0.0586741	-1.06784
KRT80	-1.47763	0.359079	3.47895	-4.59695	0.00219288	0.0586741	-0.997197
CFB	-1.23962	0.423485	4.32863	-4.59965	0.00218562	0.0586741	-1.02699
MET	-1.00779	0.497307	4.80598	-4.58805	0.00221703	0.0591453	-1.08881
THAP7	0.494721	1.40905	9.06553	4.58271	0.00223163	0.0593949	-1.57415
ANP32B	0.501451	1.41564	8.19397	4.55337	0.00231387	0.0597601	-1.5383
LIMK1	-1.30159	0.405678	3.78501	-4.55484	0.00230967	0.0597601	-1.04769
RPL18	1.28047	2.42918	3.70435	4.5559	0.00230665	0.0597601	-1.04439
GLT8D2	0.897721	1.86312	6.39034	4.55701	0.0023035	0.0597601	-1.33277
RIOK3	-0.670373	0.628344	6.60157	-4.55708	0.00230328	0.0597601	-1.35877
API5P1	-1.43051	0.370999	4.02365	-4.56034	0.00229404	0.0597601	-1.05198
RP3-406A7.3	1.91286	3.76555	2.53719	4.56436	0.00228268	0.0597601	-1.13057
HMCES	0.880352	1.84082	5.18664	4.56446	0.00228241	0.0597601	-1.16468
COX5A	0.627707	1.54511	7.36291	4.56659	0.00227641	0.0597601	-1.43642
SMARCD3	0.870919	1.82883	6.37124	4.56756	0.00227369	0.0597601	-1.31676
AP2B1	-0.664547	0.630887	7.29213	-4.57025	0.00226617	0.0597601	-1.42372
XIAP	-1.02902	0.490043	4.79769	-4.57224	0.0022606	0.0597601	-1.10732
ATP6V1A	-0.497153	0.708504	8.33144	-4.57331	0.00225763	0.0597601	-1.52462
STAT1	-0.653515	0.63573	6.92941	-4.55151	0.00231919	0.0597613	-1.40575
MICALL1	-0.738511	0.599358	6.38657	-4.54699	0.00233218	0.0599597	-1.34525
TMEM208	0.733462	1.66262	6.19669	4.54297	0.00234381	0.0599868	-1.3262
DYNC1H1	0.411948	1.33048	10.0895	4.54339	0.00234259	0.0599868	-1.70701
BTAF1	-0.628626	0.646792	6.92279	-4.5406	0.00235069	0.0600274	-1.41918
RNF114	-0.993539	0.502244	4.63556	-4.53506	0.00236685	0.0600344	-1.13504
TBCAP1	0.574117	1.48877	7.14393	4.53673	0.00236197	0.0600344	-1.45043
DEXI	1.1907	2.28263	4.53413	4.53774	0.00235902	0.0600344	-1.12111
SYNGAP1	0.836967	1.78629	6.09183	4.5315	0.00237731	0.060165	-1.32727
DLG4	-1.0601	0.4796	4.56244	-4.52638	0.00239244	0.060413	-1.13791
PGRMC1	0.649744	1.56889	8.24186	4.50711	0.00245034	0.0605271	-1.60382
TRIB1	-1.49858	0.353901	3.08084	-4.50838	0.00244646	0.0605271	-1.11235
TPCN1	-0.843236	0.557392	5.80721	-4.50936	0.0024435	0.0605271	-1.31762
RAVER1	-0.917435	0.52945	5.16092	-4.51119	0.00243795	0.0605271	-1.22834
COG5	-0.790317	0.578217	5.63947	-4.51127	0.0024377	0.0605271	-1.29234
SNRPA1	1.58519	3.00047	3.23156	4.51365	0.00243051	0.0605271	-1.09748
DST	0.526884	1.44081	8.02783	4.51401	0.00242944	0.0605271	-1.57447
LPP	0.771454	1.70699	5.79474	4.5141	0.00242915	0.0605271	-1.30985
AGL	-5.8867	0.0169016	-0.636104	-4.51759	0.00241865	0.0605271	-3.05044
RP11-342M1.7	1.74941	3.3622	3.29311	4.52135	0.00240739	0.0605271	-1.08636
HABP2	1.46865	2.76764	3.96028	4.50439	0.00245862	0.0605996	-1.11448
PTK2	-0.574254	0.671634	8.10586	-4.4977	0.00247915	0.0608412	-1.6035
KCNAB2	-0.979526	0.507146	4.95659	-4.49851	0.00247665	0.0608412	-1.21806
CPD	-0.56478	0.676058	7.45477	-4.49198	0.00249687	0.0608806	-1.54469
AHCYL1	-0.465328	0.724306	8.86816	-4.49367	0.00249162	0.0608806	-1.67599
BLVRB	0.804622	1.74669	5.89889	4.49404	0.00249047	0.0608806	-1.34982
SLC9A9	-5.85834	0.0172371	-0.65039	-4.48633	0.00251447	0.0611784	-3.0676
WHRN	-1.47436	0.359892	3.43876	-4.46914	0.00256893	0.0614484	-1.14181
TRAPPC11	-0.854536	0.553043	5.24731	-4.46949	0.00256782	0.0614484	-1.29259
ENO1	0.348035	1.27283	12.1823	4.46962	0.00256739	0.0614484	-1.961
ARCN1	-0.663482	0.631352	7.55463	-4.47194	0.00255998	0.0614484	-1.58199
IGIP	1.2633	2.40044	4.69375	4.4727	0.00255756	0.0614484	-1.21866
EXOSC7	1.06764	2.09601	4.25467	4.47358	0.00255477	0.0614484	-1.1727
TBC1D2	-1.24007	0.423352	3.71748	-4.47462	0.00255144	0.0614484	-1.13887
FYN	-0.56005	0.678279	7.25665	-4.47705	0.00254372	0.0614484	-1.5419
MTSS1L	0.847129	1.79892	5.10334	4.46388	0.00258587	0.0617233	-1.28055
RBBP7	0.487258	1.40178	8.52382	4.44159	0.00265893	0.0620309	-1.71629
CTC-260E6.2	2.17761	4.52405	2.42539	4.44233	0.00265649	0.0620309	-1.27596
ALG1L11P	0.556921	1.47113	7.14541	4.44445	0.00264942	0.0620309	-1.57197
ARHGAP5	-0.546462	0.684697	7.6589	-4.44598	0.00264438	0.0620309	-1.62751
RAPGEF1	-0.753177	0.593295	6.13769	-4.44687	0.00264143	0.0620309	-1.44302
UGCG	-0.668276	0.629258	6.30127	-4.44769	0.00263873	0.0620309	-1.46344
POLR2E	0.64078	1.55917	7.30158	4.44795	0.00263787	0.0620309	-1.58557
GRIA1	1.02122	2.02963	4.3905	4.44895	0.00263456	0.0620309	-1.21543
OSBP	-0.585841	0.666261	7.07289	-4.44929	0.00263343	0.0620309	-1.55693
RHBDD1	-1.39331	0.380691	4.50542	-4.453	0.00262126	0.0620309	-1.22224
PDS5B	-0.824913	0.564516	6.39496	-4.45603	0.00261133	0.0620309	-1.46461
ZYG11B	-1.63012	0.32306	4.04891	-4.4351	0.00268062	0.0622806	-1.20289
TSPAN17	0.656958	1.57675	6.6145	4.43565	0.00267877	0.0622806	-1.51893
CTDSP2	-0.834774	0.560671	5.19356	-4.43282	0.00268831	0.0623315	-1.33201
GNAI3	-0.623362	0.649157	7.65594	-4.42601	0.00271135	0.0623555	-1.65375
KPNA6	-0.631077	0.645694	6.60829	-4.42636	0.00271017	0.0623555	-1.53038
SDF2	0.586105	1.50119	7.10209	4.42828	0.00270365	0.0623555	-1.58823
ITM2B	0.67079	1.59194	7.27918	4.42833	0.00270348	0.0623555	-1.60898
SSR1	-0.690058	0.619829	6.79273	-4.41606	0.0027454	0.0623795	-1.56689
SLC16A1	-0.594269	0.66238	7.77579	-4.41663	0.00274346	0.0623795	-1.67874
SLC7A1	-2.07272	0.237711	4.49228	-4.41855	0.00273683	0.0623795	-1.26344
TMEM74	-5.04109	0.0303725	-0.199904	-4.41978	0.00273262	0.0623795	-2.81287
ARL5A	-0.833487	0.561171	5.52771	-4.4205	0.00273017	0.0623795	-1.39357
PIGP	1.1949	2.28929	4.10535	4.424	0.00271818	0.0623795	-1.22048
CES1	2.1057	4.30407	2.92276	4.40961	0.00276776	0.0625117	-1.23227
ETS2	-0.794913	0.576378	5.35977	-4.41023	0.00276559	0.0625117	-1.3836
SLC38A1	-0.957121	0.515084	5.0229	-4.41191	0.00275977	0.0625117	-1.33585
PTP4A3	0.756498	1.68938	6.91096	4.40186	0.00279483	0.0627482	-1.60015
CTDSPL2	-0.708407	0.611996	6.64982	-4.40197	0.00279446	0.0627482	-1.56776
BBX	-0.553958	0.681149	7.21127	-4.40385	0.00278787	0.0627482	-1.6335
UHRF1BP1L	-0.705576	0.613198	6.10792	-4.39692	0.00281226	0.0630146	-1.50433
TIA1	0.67618	1.5979	6.6655	4.39091	0.00283362	0.0632432	-1.58434
SPRED2	-0.910258	0.53209	5.33256	-4.39101	0.00283328	0.0632432	-1.4046
DNAJA1	0.523259	1.4372	7.52854	4.38453	0.00285652	0.06338	-1.69537
ZC3H7A	0.501824	1.416	7.84989	4.38483	0.00285541	0.06338	-1.72873
OPA1	-0.910992	0.531819	5.06351	-4.38544	0.00285324	0.06338	-1.37495
APLP1	0.773598	1.70953	6.33356	4.36209	0.00293855	0.0640717	-1.58016
PIK3R3	0.954633	1.93809	4.48801	4.36232	0.00293771	0.0640717	-1.33294
ASCC3	-0.591316	0.663737	6.77562	-4.36319	0.00293448	0.0640717	-1.63482
ABCA5	-1.01852	0.493623	5.57367	-4.36363	0.00293282	0.0640717	-1.47368
PICK1	-1.07785	0.473733	4.1901	-4.36588	0.00292452	0.0640717	-1.29845
WWTR1	-0.569312	0.673938	6.93242	-4.36677	0.00292123	0.0640717	-1.6494
PPP2R5C	-0.545605	0.685104	7.63271	-4.36959	0.00291084	0.0640717	-1.72665
HS6ST1P1	-1.61794	0.325801	4.38099	-4.37021	0.00290855	0.0640717	-1.31164
RP11-295H24.3	-1.41316	0.375489	3.43026	-4.3733	0.00289724	0.0640717	-1.25157
HOXA2	1.81693	3.5233	2.5028	4.35071	0.00298113	0.0643811	-1.35161
PPP1R2	-0.708228	0.612072	5.76761	-4.35211	0.00297586	0.0643811	-1.51611
PRKCDBP	0.550398	1.46449	7.15336	4.35313	0.00297203	0.0643811	-1.6943
NBPF3	1.45602	2.7435	3.41433	4.35412	0.0029683	0.0643811	-1.27366
FZD6	-1.49766	0.354127	3.69625	-4.35432	0.00296757	0.0643811	-1.27956
NEDD4	-0.447601	0.733261	8.92099	-4.34841	0.00298983	0.0644462	-1.87525
ERO1A	-0.467599	0.723167	10.1811	-4.3443	0.00300544	0.0646597	-1.98187
HIST1H4K	1.37547	2.59452	3.88897	4.34148	0.00301619	0.0647681	-1.30492
HNRNPM	0.481054	1.39576	9.03031	4.33618	0.00303649	0.0650808	-1.90085
SMTN	-0.703165	0.614223	6.28143	-4.33233	0.00305135	0.0652759	-1.61262
PCK2	-0.68868	0.620421	6.26447	-4.33042	0.00305875	0.065311	-1.61291
DDI2	-1.03132	0.489261	5.62546	-4.32786	0.00306871	0.0654004	-1.52766
TNFAIP2	-1.25114	0.420115	3.8131	-4.32318	0.00308701	0.065667	-1.32239
MPP1	0.499437	1.41366	7.84027	4.31726	0.00311031	0.0659153	-1.81859
ATP5G3	0.780725	1.71799	8.26496	4.31811	0.00310694	0.0659153	-1.85893
LDB3	1.90759	3.75181	2.47415	4.31045	0.00313733	0.0663639	-1.3981
XPA	1.00549	2.00762	4.29329	4.30898	0.00314319	0.066364	-1.37864
GVINP1	-2.02038	0.246493	2.71341	-4.3024	0.00316961	0.0667975	-1.36959
MACC1	1.07108	2.10101	4.09517	4.29732	0.00319016	0.0671059	-1.37429
NONO	0.461105	1.3766	8.60074	4.29562	0.0031971	0.0671273	-1.91963
BAIAP2	0.658136	1.57804	6.86151	4.29253	0.00320968	0.0672667	-1.73982
ATP6V0C	0.434368	1.35132	9.62066	4.28937	0.00322263	0.0674137	-2.01233
SPCS2	-0.612944	0.653861	6.81934	-4.28461	0.00324228	0.0676997	-1.74522
PLEKHG2	-2.26322	0.208306	1.79165	-4.28249	0.00325105	0.0677581	-1.63524
APOA1	1.42525	2.68562	3.59039	4.27707	0.00327362	0.0678543	-1.36728
SNAI2	0.923599	1.89684	5.82923	4.27731	0.00327262	0.0678543	-1.62313
DNAJA3	-0.642102	0.640779	6.85254	-4.27977	0.00326232	0.0678543	-1.75584
GTF2F1	0.725419	1.65338	5.78112	4.27109	0.0032987	0.068125	-1.62454
RP11-544O24.2	-1.47647	0.359367	3.1582	-4.27235	0.0032934	0.068125	-1.37062
PTX3	-2.07188	0.237849	3.07684	-4.26485	0.00332508	0.0681732	-1.38192
POMGNT1	0.55692	1.47113	6.96519	4.26495	0.00332465	0.0681732	-1.78975
MARK1	4.34749	20.3575	0.129141	4.26516	0.00332378	0.0681732	-2.66433
AC097523.3	-1.09366	0.468571	4.15627	-4.26785	0.00331237	0.0681732	-1.41628
LZTR1	0.43982	1.35644	8.82294	4.24703	0.00340178	0.0682644	-2.00488
ZFP3	-5.66877	0.0196576	-0.748088	-4.24774	0.00339869	0.0682644	-3.19075
CCNL1	0.549807	1.46389	7.44128	4.24832	0.00339616	0.0682644	-1.869
HERPUD1	-0.630314	0.646036	8.03289	-4.24837	0.00339596	0.0682644	-1.93129
PEX11B	1.27226	2.41539	3.64344	4.25028	0.00338764	0.0682644	-1.40132
WASL	-0.742219	0.597819	6.40445	-4.25252	0.00337795	0.0682644	-1.73518
SYDE1	0.683772	1.60633	5.86256	4.25367	0.00337297	0.0682644	-1.6592
ATP5G2	0.603061	1.51894	6.76609	4.25478	0.00336817	0.0682644	-1.77856
NEB	1.22593	2.33906	3.74332	4.25721	0.00335775	0.0682644	-1.39796
PEX19	-0.750383	0.594446	5.47564	-4.2574	0.00335694	0.0682644	-1.59858
FERMT2	-0.885825	0.541178	7.01075	-4.26068	0.00334285	0.0682644	-1.8011
H1FX	0.941499	1.92052	4.49146	4.26131	0.00334018	0.0682644	-1.46034
PDE1C	1.03766	2.05289	4.51102	4.24557	0.00340813	0.068271	-1.48263
HEXA	0.420857	1.33872	9.7328	4.24386	0.00341562	0.0683004	-2.08357
PTOV1	0.719246	1.64632	5.56441	4.24108	0.00342781	0.0684234	-1.63288
SPG7	0.789489	1.72846	5.81883	4.22796	0.003486	0.0684996	-1.68705
KLF9	-0.516246	0.699189	7.81782	-4.22825	0.0034847	0.0684996	-1.93696
VTCN1	-2.74321	0.149352	1.37768	-4.22914	0.00348071	0.0684996	-1.89363
TP53BP1	0.658379	1.57831	5.99836	4.2313	0.00347107	0.0684996	-1.70819
PIR	0.938016	1.91589	5.03411	4.23234	0.00346645	0.0684996	-1.56815
RPL36AP21	5.83185	56.959	0.402168	4.23251	0.00346568	0.0684996	-2.50458
XDH	-0.569685	0.673764	7.50004	-4.23255	0.00346549	0.0684996	-1.89697
MXRA7	1.2328	2.35022	3.64037	4.23405	0.00345885	0.0684996	-1.42065
SRP72	-0.533859	0.690705	7.11524	-4.23753	0.00344344	0.0684996	-1.84513
NHS	1.7184	3.29072	2.70422	4.224	0.00350374	0.0686105	-1.45475
MAGED1	0.443955	1.36033	8.99387	4.22446	0.00350169	0.0686105	-2.05013
NTAN1	0.574155	1.48881	6.9743	4.21965	0.00352338	0.068876	-1.85205
NUDCD1	-1.05521	0.481228	5.56782	-4.21561	0.00354174	0.0691157	-1.66704
PSAT1P2	-1.09807	0.467142	4.97983	-4.21143	0.00356081	0.0692495	-1.58778
PCSK9	-5.63434	0.0201323	-0.762963	-4.21204	0.00355804	0.0692495	-3.20915
LAMB2	0.559173	1.47342	7.94024	4.20277	0.00360072	0.0695486	-1.98424
CYP4F3	0.927183	1.90156	4.8371	4.2028	0.00360059	0.0695486	-1.57927
CDS2	-0.847612	0.555704	6.50695	-4.20409	0.00359461	0.0695486	-1.81368
TRIP6	0.79351	1.73329	5.72225	4.20554	0.0035879	0.0695486	-1.70293
TPRA1	0.658937	1.57892	6.14846	4.19436	0.00363995	0.0695949	-1.77859
AC079753.4	2.7963	6.94659	1.78405	4.195	0.00363695	0.0695949	-1.7151
TAGLN2	-0.835801	0.560272	6.61825	-4.19502	0.00363686	0.0695949	-1.84029
C14orf132	0.896066	1.86098	5.21917	4.19546	0.0036348	0.0695949	-1.64284
PHTF1	0.477817	1.39263	7.81941	4.19558	0.00363423	0.0695949	-1.9817
IRAK4	-2.55024	0.170727	1.80064	-4.20039	0.00361177	0.0695949	-1.70334
SLC12A5	0.560667	1.47495	7.12405	4.1908	0.00365666	0.0696794	-1.90959
IMPA2	-0.729033	0.603308	5.37858	-4.19145	0.00365361	0.0696794	-1.67134
RP5-1108M17.5	3.92406	15.1796	0.892368	4.18478	0.00368516	0.0699872	-2.21846
GBF1	-0.512792	0.700865	7.40478	-4.18539	0.00368226	0.0699872	-1.95034
ALDH2	0.54401	1.45802	7.37623	4.18194	0.00369872	0.0701273	-1.95172
VPS26A	-0.554045	0.681108	6.92419	-4.17845	0.0037154	0.0703258	-1.90165
DUSP3	-1.23392	0.425161	4.02545	-4.17412	0.00373625	0.0706026	-1.52072
AFF4	-0.462963	0.725495	8.18066	-4.16871	0.00376243	0.0707436	-2.05464
PTPRZ1	1.552	2.93223	2.74384	4.16921	0.00376003	0.0707436	-1.51032
ZC3H12C	-1.1951	0.436758	3.62303	-4.16952	0.00375853	0.0707436	-1.49762
KLHL2P1	-4.57909	0.0418365	0.737805	-4.16498	0.00378062	0.070968	-2.32757
ATP6V1H	0.450669	1.36667	8.3983	4.1634	0.00378836	0.0709958	-2.08237
WDR6	0.711447	1.63745	6.6311	4.16152	0.00379759	0.0710513	-1.88733
ARF5	0.470548	1.38564	8.17933	4.1601	0.00380459	0.0710651	-2.06636
RFK	-0.829933	0.562555	5.12625	-4.15377	0.00383587	0.071414	-1.68419
CTXN1	-2.35689	0.195212	1.67532	-4.15464	0.00383156	0.071414	-1.79897
TBC1D31	-1.92654	0.263059	2.69037	-4.1469	0.00387017	0.0719344	-1.5399
BEX3	1.61711	3.0676	2.99609	4.1409	0.00390037	0.0720234	-1.52568
RAD21	-0.725322	0.604862	5.83849	-4.14102	0.00389976	0.0720234	-1.80605
FBLN2	-0.464381	0.724782	8.86098	-4.14301	0.00388975	0.0720234	-2.15107
PRKAR2A	-0.735417	0.600644	5.6117	-4.14364	0.00388657	0.0720234	-1.76921
MYH10	0.633818	1.55167	6.51984	4.13807	0.00391471	0.0720536	-1.90471
DDX10P2	-1.11932	0.460312	4.06068	-4.13927	0.00390861	0.0720536	-1.56763
ABHD17A	0.878523	1.83849	6.3919	4.13553	0.00392766	0.0721748	-1.89123
SLC25A4	0.490256	1.40469	9.07323	4.13291	0.00394102	0.072303	-2.18287
B3GALNT2	-0.978388	0.507546	6.15094	-4.13026	0.0039546	0.0723181	-1.8653
SSR3	-0.51953	0.697599	8.69794	-4.13029	0.00395444	0.0723181	-2.15468
MAOA	0.8328	1.78114	6.21137	4.12694	0.00397169	0.0723972	-1.87829
HMOX2	0.611422	1.52776	7.23347	4.12766	0.00396795	0.0723972	-2.00902
ANK1	1.17803	2.26267	3.59098	4.12298	0.00399219	0.072654	-1.55246
GAREM1	-1.12211	0.459423	4.00772	-4.12107	0.00400211	0.0727178	-1.5854
LSS	-1.16527	0.44588	4.91855	-4.11222	0.00404841	0.0734413	-1.70874
ZNF282	1.16146	2.23684	4.19537	4.11014	0.00405937	0.0735226	-1.61835
RP11-196I18.3	1.29864	2.45997	3.55132	4.10476	0.00408789	0.0738033	-1.5726
NAGLU	-0.506412	0.703971	7.4373	-4.10544	0.00408429	0.0738033	-2.0637
RP11-467N20.7	0.940758	1.91954	6.88021	4.10225	0.00410129	0.0739275	-2.00005
DDX19A	-0.727102	0.604116	5.8049	-4.09976	0.00411464	0.0740504	-1.85666
ADAR	-0.971905	0.509833	6.38723	-4.09786	0.00412481	0.0741158	-1.9418
TPD52	-0.694438	0.61795	6.92067	-4.08539	0.00419245	0.074388	-2.02831
PHRF1	0.844022	1.79505	4.7636	4.08549	0.00419187	0.074388	-1.7219
KREMEN1	-0.671346	0.627921	6.54961	-4.0858	0.00419021	0.074388	-1.97983
PTBP1	0.443211	1.35963	8.87183	4.08696	0.00418387	0.074388	-2.22966
SORL1	-0.624317	0.648727	6.53782	-4.08791	0.00417868	0.074388	-1.97541
SHFM1	0.616101	1.53273	7.45813	4.08852	0.00417535	0.074388	-2.08941
IGF2BP2	-0.852368	0.553875	6.96495	-4.09251	0.00415367	0.074388	-2.02416
BAALC	-2.88839	0.135054	1.43211	-4.09252	0.0041536	0.074388	-1.97042
CLUAP1	0.958762	1.94364	4.22406	4.08297	0.00420569	0.0745064	-1.65616
GAPDHP51	0.497863	1.41212	9.10024	4.07756	0.00423551	0.0749176	-2.26199
AD000091.3	0.442409	1.35887	9.32112	4.07231	0.00426465	0.0751985	-2.28756
PURG	1.05338	2.07538	4.13995	4.07343	0.00425842	0.0751985	-1.65894
SCUBE2	1.43299	2.70005	3.07344	4.05385	0.00436891	0.0752806	-1.6241
CALD1	0.613168	1.52961	6.11956	4.05389	0.00436868	0.0752806	-1.96454
SLC25A14P1	-5.50948	0.0219524	-0.825848	-4.05511	0.00436174	0.0752806	-3.28823
VAT1	-0.448149	0.732983	8.08353	-4.05543	0.0043599	0.0752806	-2.20164
FAM46C	1.86041	3.63111	2.14739	4.05591	0.00435714	0.0752806	-1.72579
YTHDC2	-0.922918	0.527441	4.51335	-4.05781	0.00434633	0.0752806	-1.7242
UBTD1	0.562991	1.47733	6.48828	4.05887	0.0043403	0.0752806	-2.00856
MFAP3L	-0.694116	0.618088	5.78408	-4.05907	0.00433914	0.0752806	-1.90857
IRAK1BP1	0.667307	1.58811	5.97196	4.05927	0.00433805	0.0752806	-1.93596
HOXD10	0.799366	1.74034	6.84633	4.06225	0.00432112	0.0752806	-2.05065
CTDP1	-1.82059	0.283105	2.40342	-4.06273	0.00431846	0.0752806	-1.66775
NDUFS2	0.527175	1.4411	7.08788	4.06614	0.0042992	0.0752806	-2.07576
PPIAP9	-1.60719	0.328236	3.19155	-4.06641	0.00429767	0.0752806	-1.60884
ALAS1	0.577111	1.49186	6.55093	4.06825	0.00428737	0.0752806	-2.00401
FTLP3	0.85046	1.80308	4.70942	4.07001	0.00427754	0.0752806	-1.7347
MITF	-0.901685	0.535261	5.63822	-4.05088	0.00438597	0.0753457	-1.89773
MEF2D	-0.546338	0.684756	7.6676	-4.05158	0.00438196	0.0753457	-2.16384
RP11-400K9.2	-1.1877	0.439004	4.40568	-4.04735	0.00440627	0.0754657	-1.72383
GFPT2	-1.22222	0.428622	3.86115	-4.04808	0.00440206	0.0754657	-1.66368
OSTC	-0.765288	0.588336	6.20346	-4.04376	0.00442706	0.0755933	-1.99032
FMNL3	-0.653992	0.635519	7.19306	-4.04386	0.00442651	0.0755933	-2.11946
GRAMD1B	-0.696948	0.616876	5.80034	-4.0364	0.00447001	0.0759834	-1.9417
MXRA8	0.485399	1.39997	8.54888	4.03652	0.00446935	0.0759834	-2.27183
ANKHD1	0.564545	1.47892	7.1689	4.03725	0.00446504	0.0759834	-2.12566
RIN1	-0.776983	0.583586	5.21024	-4.03208	0.00449545	0.0760738	-1.8582
TCEA1	-0.704444	0.613679	5.62026	-4.03248	0.00449311	0.0760738	-1.91993
THNSL1	-1.45319	0.365213	3.44169	-4.03431	0.00448233	0.0760738	-1.65324
EIF4EBP3	1.3817	2.60575	3.30413	4.03064	0.00450393	0.0761036	-1.65303
ATRAID	0.684909	1.6076	7.84019	4.02942	0.00451119	0.0761128	-2.21301
AREL1	-0.566446	0.675278	6.53348	-4.02357	0.004546	0.0761337	-2.06304
HIST1H4B	3.11981	8.69271	0.861356	4.02431	0.00454157	0.0761337	-2.34026
NFYA	-0.962574	0.51314	4.70004	-4.02445	0.0045407	0.0761337	-1.79322
USP22	-0.680971	0.623745	6.61939	-4.02488	0.00453817	0.0761337	-2.07256
PPP3CA	-0.397695	0.75907	9.19804	-4.02696	0.00452578	0.0761337	-2.34077
S100A3	1.06634	2.09412	4.13307	4.01807	0.00457899	0.0764603	-1.72886
SOD1	0.517685	1.43166	8.21651	4.01856	0.00457602	0.0764603	-2.26603
LARP4B	-0.644455	0.639734	7.05461	-4.01574	0.00459303	0.0764696	-2.1412
TOR3A	-0.896008	0.537371	5.06791	-4.0158	0.00459265	0.0764696	-1.85842
GPRC5B	-0.968627	0.510992	4.73989	-4.01383	0.00460459	0.0765495	-1.81281
ARL6IP5	0.4554	1.37116	8.05648	4.00924	0.00463249	0.0767882	-2.26328
CPT1C	1.2579	2.39148	3.30872	4.00962	0.00463016	0.0767882	-1.67842
SELT	-0.496813	0.708671	7.20856	-4.00094	0.00468338	0.0768453	-2.18081
ELP3	-1.44164	0.368149	3.36422	-4.00148	0.00468009	0.0768453	-1.69002
PLEKHM1	-0.833713	0.561083	4.89882	-4.00165	0.00467901	0.0768453	-1.852
STK4	-0.883988	0.541867	4.5861	-4.00206	0.00467649	0.0768453	-1.80679
NMT2	-1.07417	0.474944	3.86032	-4.00259	0.00467324	0.0768453	-1.72082
TMX4	-1.56734	0.33743	2.55619	-4.00347	0.00466779	0.0768453	-1.71093
TBC1D15	-0.587208	0.66563	6.88546	-4.00646	0.00464945	0.0768453	-2.13258
SGSM2	-0.947562	0.518508	4.18773	-3.97399	0.00485293	0.0768471	-1.79192
BNIP3L	-0.434502	0.739949	9.08731	-3.97408	0.00485239	0.0768471	-2.40576
RAB28	-0.73443	0.601055	5.14149	-3.97415	0.00485191	0.0768471	-1.9255
CYSTM1	-0.960766	0.513784	5.22144	-3.97479	0.00484784	0.0768471	-1.93688
ERN1	-0.663773	0.631225	6.27288	-3.9762	0.00483881	0.0768471	-2.09269
NSUN3	-1.50211	0.353038	2.69637	-3.97721	0.00483235	0.0768471	-1.72742
BAZ2B	0.584295	1.49931	6.38489	3.97726	0.00483202	0.0768471	-2.10681
CYB561D1	2.30386	4.93777	1.90706	3.9776	0.00482986	0.0768471	-1.86915
PTBP1P	0.945945	1.92645	4.44598	3.97789	0.00482797	0.0768471	-1.8195
FNBP1	-2.11821	0.230333	3.04045	-3.97881	0.00482214	0.0768471	-1.71232
SBF1	-0.482139	0.715915	7.70888	-3.98175	0.00480348	0.0768471	-2.26551
CGGBP1	-0.9152	0.53027	5.06814	-3.98252	0.00479858	0.0768471	-1.90298
PTPN5	-2.29987	0.203081	1.64749	-3.98287	0.00479637	0.0768471	-1.96117
TIPARP	-0.578897	0.669476	7.09872	-3.98385	0.00479016	0.0768471	-2.19099
STAT3	-0.528614	0.69322	8.00663	-3.98485	0.00478386	0.0768471	-2.29232
TIMM13	0.628999	1.54649	8.40792	3.98497	0.00478309	0.0768471	-2.33109
TSC22D2	0.467191	1.38242	7.70743	3.98598	0.00477671	0.0768471	-2.25944
CHPF	0.501513	1.4157	7.78463	3.98689	0.00477096	0.0768471	-2.26646
SPEG	0.545438	1.45946	6.62379	3.98709	0.00476971	0.0768471	-2.12527
ALMS1	1.45931	2.74977	4.05872	3.98806	0.00476359	0.0768471	-1.75912
RRM2B	-0.919709	0.528616	5.02918	-3.98842	0.00476136	0.0768471	-1.88917
KIF1C	0.43638	1.3532	8.5115	3.99186	0.00473978	0.0768471	-2.33092
MAB21L2	1.42979	2.69407	2.91737	3.99206	0.00473853	0.0768471	-1.69927
RELT	1.16901	2.24858	3.6004	3.99538	0.00471784	0.0768471	-1.70953
SMG1	0.468356	1.38353	7.96928	3.99838	0.0046992	0.0768471	-2.26959
DEPTOR	-1.32431	0.39934	3.13597	-3.96964	0.00488094	0.0771828	-1.72316
SEC23B	-0.545214	0.68529	7.98765	-3.96325	0.00492235	0.0776212	-2.32062
RPS6KA2	-2.1186	0.230271	3.41447	-3.96396	0.00491774	0.0776212	-1.7378
EHMT2	0.465183	1.38049	7.67895	3.95988	0.00494438	0.0776446	-2.2928
ZPR1	-0.665914	0.630289	5.87087	-3.95992	0.00494408	0.0776446	-2.05662
SLF1	1.07057	2.10027	3.88201	3.96185	0.00493152	0.0776446	-1.77442
RPL5	0.360345	1.28373	10.2574	3.95809	0.00495608	0.0777206	-2.52362
ENO3	0.807825	1.75057	4.95896	3.95012	0.00500872	0.0777929	-1.92987
CACNA1A	1.62166	3.07729	2.76937	3.95017	0.00500837	0.0777929	-1.75353
ARIH2	-0.607006	0.656558	6.40662	-3.95184	0.00499729	0.0777929	-2.14486
EEF1A1P27	-0.488743	0.712646	8.08694	-3.95211	0.00499551	0.0777929	-2.34628
ERO1B	-3.13512	0.113824	2.42737	-3.95242	0.00499349	0.0777929	-1.78209
GPR85	0.819471	1.76476	4.80444	3.95282	0.00499081	0.0777929	-1.90312
ABCA1	-0.829872	0.562579	4.66776	-3.95608	0.0049693	0.0777929	-1.87897
FZD2	0.862471	1.81815	4.95421	3.948	0.00502279	0.0779047	-1.93199
MOSPD1	-0.885118	0.541443	4.72458	-3.94564	0.00503853	0.0780421	-1.90097
CCNG2	0.636011	1.55403	6.43591	3.94125	0.00506795	0.0781775	-2.1635
VAMP4	-0.850822	0.554469	5.49916	-3.94182	0.00506411	0.0781775	-2.02444
FAM83H	-1.31167	0.402853	3.1232	-3.94304	0.00505594	0.0781775	-1.75474
IL32	1.55428	2.93688	2.70371	3.92613	0.00517071	0.0783764	-1.78465
ULK1	0.5893	1.50452	6.10938	3.92618	0.00517039	0.0783764	-2.13834
BEST1	0.7923	1.73183	4.80557	3.92647	0.00516837	0.0783764	-1.93847
MAPRE2	-0.586579	0.66592	6.0851	-3.92653	0.00516795	0.0783764	-2.13436
RPL12P38	1.42699	2.68885	4.30024	3.927	0.00516473	0.0783764	-1.86696
ME3	1.24851	2.37596	3.77068	3.92712	0.0051639	0.0783764	-1.80814
ADAMTS14	-2.20041	0.217576	1.81875	-3.9284	0.00515517	0.0783764	-1.94546
UBE2W	-0.627464	0.647313	6.55104	-3.92842	0.00515501	0.0783764	-2.19691
LENG8	-0.561546	0.677576	6.66353	-3.92955	0.00514724	0.0783764	-2.21035
TRAF4	0.719861	1.64702	5.37865	3.93151	0.0051339	0.0783764	-2.01981
FIS1	0.562411	1.47674	6.3428	3.933	0.00512377	0.0783764	-2.16217
PCDHB18P	-5.46583	0.0226267	-0.845879	-3.9346	0.0051129	0.0783764	-3.33499
H3F3A	0.526581	1.44051	9.05136	3.93544	0.00510715	0.0783764	-2.45718
ACAP2	-0.601245	0.659185	6.0648	-3.92412	0.00518454	0.078481	-2.13474
SRGAP3	-0.53469	0.690307	7.67052	-3.92152	0.00520248	0.0786476	-2.34566
CDH13	-0.654492	0.635299	6.34577	-3.91179	0.00527028	0.0794607	-2.19199
RAB3GAP1	-0.679883	0.624216	5.39992	-3.91249	0.00526535	0.0794607	-2.04905
SLC35A3	-0.796414	0.575779	5.08627	-3.90482	0.0053194	0.079777	-2.01044
PSMC5	0.488149	1.40264	7.23359	3.90534	0.00531571	0.079777	-2.31731
MTPN	-0.426407	0.744113	8.20355	-3.90616	0.00530994	0.079777	-2.42252
GAS6	0.727807	1.65612	5.99667	3.90635	0.00530854	0.079777	-2.14914
SHMT2	-0.61975	0.650784	6.96588	-3.90284	0.00533347	0.0798822	-2.28714
LAMP1	0.381451	1.30265	9.47097	3.90132	0.00534429	0.0799387	-2.54042
RP11-717K11.2	-0.792834	0.577209	5.72873	-3.89567	0.00538465	0.0804363	-2.12326
CD81	0.425222	1.34278	9.25584	3.89463	0.00539215	0.0804423	-2.53213
COX6CP10	0.58306	1.49802	7.1736	3.89004	0.00542525	0.0805124	-2.33136
EDF1	0.528569	1.4425	7.79959	3.89041	0.00542256	0.0805124	-2.40344
TRPM3	-1.47201	0.36048	2.66624	-3.89115	0.00541718	0.0805124	-1.82671
KPNA1	-0.546638	0.684614	6.80862	-3.89218	0.00540976	0.0805124	-2.28163
LDHAP7	0.404693	1.32381	10.3108	3.88888	0.00543366	0.0805318	-2.62612
IPO5	-0.522025	0.696394	6.94187	-3.8851	0.00546113	0.0808333	-2.30888
GTF2A1	-0.607261	0.656442	6.45574	-3.8825	0.00548008	0.0809026	-2.24788
RBMS1	-0.521461	0.696666	8.33161	-3.88321	0.00547495	0.0809026	-2.46728
AQR	-0.710643	0.611048	5.33349	-3.87743	0.00551733	0.0813465	-2.0865
CRIM1	-0.466014	0.723962	7.41607	-3.87218	0.00555616	0.0817066	-2.38605
HIF1A	-0.43497	0.739709	8.28104	-3.87252	0.00555366	0.0817066	-2.47753
LRRC25	0.796989	1.73747	5.81987	3.8676	0.00559034	0.0817849	-2.17596
LONRF3	-0.930159	0.524801	4.29101	-3.86803	0.00558708	0.0817849	-1.94311
ARFIP1	-0.718156	0.607874	6.1738	-3.86812	0.00558643	0.0817849	-2.22821
BRWD1	0.753788	1.68621	4.9428	3.87034	0.00556987	0.0817849	-2.0348
LPCAT2	1.19692	2.2925	4.13674	3.86506	0.00560931	0.0818512	-1.92721
YWHAG	-0.406727	0.754333	8.81763	-3.86511	0.00560893	0.0818512	-2.5368
PPP1R14A	1.66134	3.16311	2.72537	3.86383	0.00561859	0.0818812	-1.85467
RP11-759L5.2	0.357622	1.28131	10.0547	3.86273	0.00562689	0.081897	-2.64283
ZNF706	-0.484497	0.714746	7.10138	-3.86048	0.00564386	0.0820386	-2.36385
ANKRD28	-0.526872	0.694058	6.94433	-3.85521	0.00568381	0.082408	-2.35116
ZCCHC11	-0.664736	0.630804	6.90256	-3.85594	0.00567823	0.082408	-2.34466
MYO7B	1.14279	2.20808	3.90676	3.85094	0.00571643	0.0826696	-1.91894
BCL7C	0.772618	1.70837	5.55738	3.85164	0.00571103	0.0826696	-2.15712
PMPCA	-0.698363	0.616271	5.2825	-3.84947	0.00572768	0.0827267	-2.11676
SECISBP2L	-0.558024	0.679232	6.33561	-3.8457	0.00575671	0.0830402	-2.28262
ATF4	-0.380296	0.76828	9.19784	-3.84428	0.00576765	0.0830922	-2.59884
DDX54	-0.819999	0.566443	4.75472	-3.84105	0.00579267	0.0831358	-2.04544
PDE4B	-4.9606	0.0321152	-0.379605	-3.84134	0.00579045	0.0831358	-3.13543
DIP2A	-0.568885	0.674138	6.26716	-3.84231	0.0057829	0.0831358	-2.2776
CNN3	0.475266	1.39017	8.65178	3.83886	0.00580974	0.0832754	-2.55957
DPF2	-0.667521	0.629587	5.50527	-3.83613	0.00583109	0.0834759	-2.17026
DNAJC18	-1.3146	0.402036	3.02834	-3.83133	0.00586877	0.0834882	-1.88751
STK10	0.66419	1.58468	7.12842	3.83165	0.00586626	0.0834882	-2.40791
MTRNR2L13	1.1693	2.24902	3.58564	3.83168	0.00586598	0.0834882	-1.91331
MTHFD2P5	-1.58531	0.333253	3.71087	-3.834	0.00584774	0.0834882	-1.92109
LCTL	2.11414	4.32932	2.02491	3.83477	0.00584175	0.0834882	-1.97806
MGAT4A	-1.83425	0.280437	2.19009	-3.82708	0.00590232	0.0836507	-1.9524
MANF	-0.460404	0.726783	8.30579	-3.82719	0.00590152	0.0836507	-2.54427
SMCO4	1.16487	2.24213	3.45352	3.82826	0.00589298	0.0836507	-1.90799
EIF4A1	0.42955	1.34681	9.29223	3.8231	0.00593398	0.0837852	-2.63697
BTG2	0.772672	1.70843	5.04437	3.82368	0.00592935	0.0837852	-2.11403
NAV1	-0.718221	0.607846	5.36704	-3.82437	0.00592388	0.0837852	-2.16454
RALGPS2	-1.73184	0.301068	2.37446	-3.8192	0.00596523	0.0841217	-1.93376
CARS	-0.491369	0.71135	7.25497	-3.81284	0.00601641	0.0846328	-2.4503
CHRNA1	-1.95338	0.25821	3.17429	-3.81299	0.00601525	0.0846328	-1.91288
MGMT	1.0831	2.11858	4.06601	3.80658	0.00606737	0.084719	-1.99503
TNKS	-0.767273	0.587527	6.37953	-3.80665	0.00606679	0.084719	-2.34351
TRRAP	0.530414	1.44434	6.93745	3.80773	0.00605797	0.084719	-2.41715
PRMT2	-0.642023	0.640814	5.68573	-3.808	0.00605577	0.084719	-2.23766
SIPA1	-1.66477	0.315395	2.71719	-3.80986	0.00604062	0.084719	-1.91733
RNF10	0.366141	1.2889	9.75567	3.80988	0.0060405	0.084719	-2.69409
HMGN3	0.675945	1.59764	5.65898	3.79738	0.00614298	0.0847313	-2.24817
EIF1AD	-0.738373	0.599415	5.68806	-3.79751	0.00614193	0.0847313	-2.25259
DTWD1	1.27715	2.4236	3.15903	3.79754	0.00614171	0.0847313	-1.93127
SLC7A5P2	-0.750504	0.594396	4.85548	-3.79766	0.00614071	0.0847313	-2.11972
SCARA3	0.941336	1.92031	5.47164	3.80038	0.00611826	0.0847313	-2.21432
GSK3B	-0.427631	0.743482	7.99176	-3.80124	0.00611112	0.0847313	-2.54992
SEC16A	-0.759946	0.590518	4.81674	-3.80178	0.0061067	0.0847313	-2.10811
UBXN1	0.502239	1.41641	8.13485	3.80201	0.00610482	0.0847313	-2.56336
MAPKAPK2	-0.504833	0.704742	6.81192	-3.80299	0.00609674	0.0847313	-2.40736
C1QTNF5	1.01693	2.0236	4.9613	3.80443	0.00608496	0.0847313	-2.12717
AARS	-0.427383	0.74361	7.95936	-3.79105	0.00619564	0.084736	-2.56108
ANP32BP3	0.545226	1.45925	6.40921	3.79107	0.00619554	0.084736	-2.36951
AUP1	0.418074	1.33614	8.42203	3.7916	0.00619109	0.084736	-2.60599
AAAS	0.605585	1.5216	6.10152	3.79262	0.0061826	0.084736	-2.32296
LCMT2	1.41484	2.66629	3.28323	3.79341	0.00617596	0.084736	-1.94151
VDAC2	0.430456	1.34766	8.13648	3.79423	0.00616919	0.084736	-2.57461
HS6ST2	1.02399	2.03354	3.97156	3.79448	0.00616711	0.084736	-1.99945
EPB41L4B	-0.950394	0.517491	4.18463	-3.78835	0.00621829	0.0847391	-2.03417
PTP4A2	-0.447042	0.733545	8.15885	-3.78894	0.00621332	0.0847391	-2.5844
GOLGA4	0.494969	1.40929	7.15169	3.78958	0.00620799	0.0847391	-2.47035
NEK7	-0.778831	0.582839	5.32557	-3.78719	0.00622802	0.0847698	-2.20917
ARRDC3	-0.520597	0.697083	7.28333	-3.77998	0.00628897	0.0851904	-2.50043
SNCA	0.479738	1.39449	7.4877	3.78023	0.00628678	0.0851904	-2.52465
RP11-967K21.2	0.960854	1.94646	4.07796	3.78088	0.00628129	0.0851904	-2.03024
BCRP6	-4.89868	0.0335237	-0.0751326	-3.78098	0.00628048	0.0851904	-3.00304
PAPOLA	-0.40941	0.752931	8.6245	-3.77792	0.00630643	0.0852232	-2.64408
LOXL3	1.01704	2.02376	4.12502	3.77871	0.00629973	0.0852232	-2.03907
USMG5	0.440252	1.35684	7.86451	3.77531	0.00632871	0.0854226	-2.57359
RP11-369G6.2	0.431694	1.34882	8.47789	3.77253	0.00635258	0.0854396	-2.63847
PCOLCE2	0.431238	1.34839	8.56088	3.7732	0.00634683	0.0854396	-2.6451
HIPK1	-0.430712	0.741896	8.61935	-3.77395	0.00634035	0.0854396	-2.6493
R3HDM1	-0.61056	0.654943	6.92189	-3.77125	0.00636354	0.0854855	-2.46669
FSIP2	2.34577	5.08331	1.41456	3.76546	0.00641353	0.0857507	-2.25039
E2F1	0.61324	1.52969	6.10678	3.76589	0.00640982	0.0857507	-2.3612
LRBA	-0.59314	0.662899	6.12626	-3.76603	0.00640858	0.0857507	-2.36388
FLRT3	-0.641269	0.641149	5.74416	-3.76725	0.00639803	0.0857507	-2.30365
CFL1P4	0.942448	1.92179	4.94547	3.7635	0.00643059	0.0857765	-2.18053
RHOT1P3	-5.35613	0.0244143	-0.900081	-3.76362	0.00642952	0.0857765	-3.41446
MYO1D	-0.484914	0.71454	7.36701	-3.75979	0.00646298	0.0860062	-2.53931
DDX31	1.5139	2.85582	2.60134	3.75984	0.00646254	0.0860062	-1.98064
PAPPA2	-5.28994	0.0255606	-0.934766	-3.75847	0.0064745	0.0860584	-3.43155
RP1-191J18.65	0.860402	1.81554	4.45414	3.75485	0.00650627	0.0860771	-2.11655
MEGF8	0.518019	1.43199	7.53889	3.7554	0.00650146	0.0860771	-2.56595
SYNC	0.790406	1.72956	5.4354	3.75633	0.00649325	0.0860771	-2.26955
NTMT1	0.90144	1.86793	4.39644	3.75722	0.00648545	0.0860771	-2.10499
PRKDC	0.601253	1.51703	6.33871	3.75239	0.00652799	0.0861634	-2.41404
SLC44A1	-0.402125	0.756743	8.6902	-3.75323	0.0065206	0.0861634	-2.68534
EPB41L3	1.80909	3.5042	3.11825	3.7503	0.00654652	0.0862072	-1.98777
GNA13	-0.801462	0.573767	6.1854	-3.75048	0.00654492	0.0862072	-2.39454
CSNK2A3	-1.09408	0.468435	6.09444	-3.74773	0.00656933	0.0862073	-2.38489
IRF2BP1	0.752902	1.68518	4.94199	3.74851	0.0065624	0.0862073	-2.20049
EPRS	-0.389029	0.763644	8.77033	-3.74914	0.00655685	0.0862073	-2.69827
ADAM12	-5.368	0.0242143	-0.893721	-3.7463	0.00658211	0.0862751	-3.41724
LRRC8B	-1.93313	0.26186	2.00056	-3.74252	0.00661596	0.0866186	-2.07803
DSEL	0.781267	1.71864	4.6387	3.74134	0.00662652	0.0866569	-2.16261
KIAA1107	2.1467	4.42813	2.41666	3.73138	0.0067167	0.087634	-2.02665
FOSL2	-0.46358	0.725185	7.29431	-3.73187	0.00671224	0.087634	-2.57026
KCTD10	0.50931	1.42337	8.019	3.72869	0.00674126	0.0878534	-2.65641
GALK2	0.715394	1.64193	5.3742	3.71866	0.00683371	0.0879461	-2.31191
ODC1	-0.454364	0.729832	7.39887	-3.71908	0.0068298	0.0879461	-2.60126
MGAT3	-2.76898	0.146708	1.09803	-3.71924	0.00682835	0.0879461	-2.43189
SMC1A	0.41036	1.32902	8.12975	3.71979	0.00682325	0.0879461	-2.68043
PSMB3	0.50098	1.41517	6.86917	3.72087	0.00681323	0.0879461	-2.53127
TECPR1	-0.921386	0.528001	4.5104	-3.72118	0.00681034	0.0879461	-2.1704
VCL	-0.425045	0.744815	8.6615	-3.72134	0.00680891	0.0879461	-2.7286
PGAM1P2	-0.351813	0.783599	10.5014	-3.72384	0.0067858	0.0879461	-2.87816
NACAP1	0.396056	1.31591	8.53565	3.72402	0.00678418	0.0879461	-2.71337
SH3PXD2A	0.50664	1.42074	7.08095	3.72456	0.00677916	0.0879461	-2.55369
FKBP9	0.445146	1.36145	7.64516	3.72635	0.00676273	0.0879461	-2.61959
SEC61A1	-0.389285	0.763508	9.00155	-3.71438	0.00687366	0.0880605	-2.76837
APEX1	0.549755	1.46384	6.43555	3.71467	0.00687092	0.0880605	-2.48102
NR2C2	-1.12378	0.45889	5.04241	-3.71479	0.00686977	0.0880605	-2.26304
CFAP157	2.15976	4.46839	1.69437	3.71551	0.00686308	0.0880605	-2.18918
CDC42BPA	-0.410853	0.752179	8.33177	-3.71239	0.0068923	0.0881997	-2.71098
ZNF426	1.08688	2.12414	3.73989	3.71076	0.00690758	0.0882956	-2.08263
EZR	-0.382918	0.766885	8.92513	-3.70408	0.00697066	0.0890015	-2.77662
PDE1B	-0.880069	0.543342	4.36356	-3.70116	0.00699839	0.0891548	-2.17555
DSCR3	-0.831038	0.562124	5.03233	-3.70144	0.00699579	0.0891548	-2.27983
RP11-451J24.1	0.449151	1.36524	7.97973	3.6974	0.00703436	0.089312	-2.69722
COX6B1	0.44196	1.35845	7.64008	3.69769	0.00703156	0.089312	-2.66008
PRDX5	0.52664	1.44057	6.61526	3.69878	0.00702115	0.089312	-2.52846
ISOC1	-2.11056	0.231557	2.7991	-3.69629	0.00704504	0.0893475	-2.04884
DAZAP1	0.444473	1.36082	7.53004	3.69439	0.00706321	0.0894779	-2.65215
E2F4	-0.515639	0.699483	6.76271	-3.69112	0.00709483	0.0894786	-2.55941
R3HDM4	1.00371	2.00515	5.14688	3.69128	0.0070933	0.0894786	-2.31277
ZNFX1	-0.727236	0.60406	5.73887	-3.69157	0.00709045	0.0894786	-2.40878
NFAT5	0.427871	1.34525	8.00302	3.6916	0.00709014	0.0894786	-2.70798
TNFAIP1	-0.564375	0.676248	6.10712	-3.68527	0.00715167	0.0894984	-2.47488
TMEM263	-1.03239	0.488901	4.23082	-3.68556	0.00714879	0.0894984	-2.17733
GPR68	3.05071	8.28617	0.790026	3.68598	0.00714473	0.0894984	-2.60684
ATF2	-0.55642	0.679987	6.4866	-3.68722	0.00713269	0.0894984	-2.52718
USO1	-0.450944	0.731564	7.35617	-3.68834	0.00712171	0.0894984	-2.64003
MCOLN1	0.510671	1.42471	6.52582	3.68847	0.00712049	0.0894984	-2.53086
AQP5	0.947689	1.92878	4.1301	3.68917	0.00711372	0.0894984	-2.15847
PLP2	-0.586494	0.665959	6.31536	-3.67945	0.00720863	0.0895196	-2.51387
LPCAT1	-1.1246	0.45863	3.55383	-3.67987	0.00720452	0.0895196	-2.1042
PKNOX1	-1.26881	0.415002	3.33967	-3.68006	0.00720268	0.0895196	-2.0867
KB-1205A7.1	0.521075	1.43502	7.1546	3.68148	0.00718868	0.0895196	-2.62469
UBBP4	0.3523	1.27659	10.4603	3.68171	0.00718647	0.0895196	-2.93592
ERCC6	-1.04507	0.484622	3.56175	-3.682	0.00718363	0.0895196	-2.10219
INTS6L	-0.955045	0.515826	3.96469	-3.68419	0.00716214	0.0895196	-2.14343
OGDHL	0.842364	1.79299	4.53448	3.67852	0.00721783	0.0895359	-2.23194
PCGF1	0.727056	1.65526	4.84034	3.67685	0.00723435	0.0896427	-2.28253
CTSH	0.852298	1.80537	4.49455	3.67497	0.00725286	0.089676	-2.2306
RAB18	-0.438555	0.737873	8.17321	-3.67515	0.00725111	0.089676	-2.74904
SLC48A1	-0.451826	0.731117	7.71633	-3.67321	0.0072704	0.0897949	-2.70378
FZD8	0.740294	1.67052	5.2102	3.67008	0.00730152	0.0898856	-2.3526
CREBZF	0.509742	1.4238	6.78432	3.67038	0.00729852	0.0898856	-2.59193
EPS8L2	0.805761	1.74807	6.13699	3.67041	0.00729824	0.0898856	-2.5004
GLMP	0.451254	1.36723	7.67412	3.66907	0.00731162	0.0899123	-2.70499
RP11-241F15.9	-2.36792	0.193724	1.57028	-3.66321	0.00737041	0.0903413	-2.28075
FAM193A	0.566016	1.48043	5.90844	3.66375	0.00736495	0.0903413	-2.47482
SLC12A6	-0.805043	0.572345	4.77601	-3.66458	0.00735658	0.0903413	-2.28897
TPRN	1.30049	2.46313	3.16942	3.66115	0.00739115	0.0904977	-2.10018
FN1	-0.303474	0.810299	11.2321	-3.65829	0.00742014	0.0907547	-3.03057
DNAJC10	-0.490134	0.711959	6.86849	-3.6564	0.00743942	0.0907946	-2.62319
SBNO1	-0.47931	0.717321	7.27483	-3.65705	0.0074328	0.0907946	-2.67492
TRMT2A	0.836768	1.78605	4.59858	3.65539	0.00744969	0.0908221	-2.27337
KRT8P10	2.15707	4.46009	1.57038	3.64924	0.00751264	0.0910025	-2.29366
RBM39	0.337823	1.26385	9.96851	3.64967	0.0075082	0.0910025	-2.94265
H2AFY2	0.698661	1.623	5.04154	3.65036	0.00750117	0.0910025	-2.35205
RASL11A	1.22769	2.34192	4.22431	3.65103	0.00749431	0.0910025	-2.22278
AC013461.1	-0.597256	0.66101	5.85083	-3.65183	0.00748604	0.0910025	-2.48253
ZMIZ1	-0.503298	0.705492	7.29881	-3.65264	0.00747775	0.0910025	-2.68425
RUNX1	-0.554528	0.68088	6.09583	-3.64839	0.00752142	0.0910116	-2.52546
BMPR1A	-0.844108	0.557055	4.36064	-3.64382	0.00756865	0.0912908	-2.25258
DYNLL2	0.446635	1.36286	8.13292	3.64394	0.00756738	0.0912908	-2.78999
AZIN2	0.59536	1.51085	6.7526	3.64431	0.00756358	0.0912908	-2.62489
PLOD3	-0.496863	0.708646	6.6665	-3.64182	0.00758945	0.0914444	-2.61675
RANBP17	-5.20938	0.0270284	-0.974355	-3.63913	0.0076174	0.0916838	-3.48711
SLC25A13	0.804769	1.74687	5.43864	3.6217	0.00780185	0.0919516	-2.45815
ZFHX4	0.499383	1.41361	6.54379	3.62236	0.00779472	0.0919516	-2.62764
REEP5	0.467241	1.38246	7.9322	3.62288	0.00778925	0.0919516	-2.79971
RP11-383G6.4	-5.1911	0.0273731	-0.986379	-3.62307	0.00778714	0.0919516	-3.49737
GBP4	-0.818714	0.566947	4.44719	-3.6233	0.00778474	0.0919516	-2.29359
EXOC6B	-0.649275	0.637601	5.68692	-3.62423	0.00777475	0.0919516	-2.49522
SLC38A10	-0.685386	0.62184	5.05118	-3.62517	0.00776472	0.0919516	-2.38866
ZMYM3	-0.637666	0.642752	5.42742	-3.62533	0.00776304	0.0919516	-2.45119
WASF2	-0.512626	0.700945	6.41377	-3.62772	0.00773758	0.0919516	-2.60165
FAR1	-0.52636	0.694304	6.37084	-3.62783	0.00773649	0.0919516	-2.59542
MINOS1	0.453759	1.3696	7.11746	3.62883	0.00772587	0.0919516	-2.69546
SHC1	-0.759308	0.59078	5.88765	-3.62976	0.00771602	0.0919516	-2.51965
ARID5B	0.438377	1.35508	7.41728	3.63051	0.00770802	0.0919516	-2.73062
EIF5P1	-0.817747	0.567327	4.67964	-3.63081	0.00770484	0.0919516	-2.32
ZNF367	-0.908605	0.5327	4.83891	-3.63129	0.00769978	0.0919516	-2.34511
KIAA1033	-0.513856	0.700348	6.7709	-3.63217	0.00769046	0.0919516	-2.64476
TRIP11	-0.735827	0.600474	5.32866	-3.63253	0.00768669	0.0919516	-2.42471
ANP32BP1	0.493611	1.40796	6.71449	3.63375	0.00767389	0.0919516	-2.63483
PTMA	0.332601	1.25928	10.3977	3.63418	0.00766937	0.0919516	-3
ZNF276	0.838425	1.7881	4.49327	3.63426	0.00766851	0.0919516	-2.28583
EHD4	-0.646657	0.638759	5.84898	-3.62082	0.00781128	0.091967	-2.52613
LHFPL2	-1.40387	0.377913	3.27779	-3.61929	0.00782771	0.0920649	-2.15935
ABCE1	-0.451591	0.731236	7.63728	-3.61469	0.00787736	0.0923614	-2.77927
SMG7	-0.603471	0.658168	6.97822	-3.6148	0.00787616	0.0923614	-2.69746
RPLP0	0.374976	1.29682	9.37943	3.61537	0.00787	0.0923614	-2.94382
PPP6R3	-0.395012	0.760483	8.17253	-3.61124	0.00791478	0.0925132	-2.84134
CH507-9B2.3	0.63126	1.54892	6.12273	3.61127	0.0079145	0.0925132	-2.5823
LZTS2	0.402317	1.32163	8.25057	3.61169	0.00790986	0.0925132	-2.84843
NRBP2	-1.3895	0.381697	3.77604	-3.60273	0.00800797	0.0926473	-2.22802
FAM53C	-0.558079	0.679206	6.01398	-3.60319	0.00800289	0.0926473	-2.57715
ITGA10	0.824917	1.77143	4.53619	3.60348	0.00799967	0.0926473	-2.33467
ASCC2	-0.643572	0.640126	6.00047	-3.6036	0.00799837	0.0926473	-2.57444
CTNNAL1	-0.556465	0.679966	6.3669	-3.60424	0.00799135	0.0926473	-2.62855
CSF1R	-2.66041	0.158175	1.14836	-3.60435	0.00799015	0.0926473	-2.50026
SEMA3F	0.552457	1.46658	6.60055	3.60653	0.00796626	0.0926473	-2.65816
PLEKHH2	1.27131	2.41381	2.91353	3.60669	0.00796444	0.0926473	-2.15794
ALYREF	0.834427	1.78315	4.44956	3.60785	0.00795181	0.0926473	-2.31503
TOMM70	-0.438692	0.737803	7.3658	-3.60791	0.00795106	0.0926473	-2.75688
IFT43	0.611093	1.52742	5.56785	3.59877	0.0080517	0.0926803	-2.51174
NLRC3	1.51068	2.84944	2.67754	3.59925	0.00804648	0.0926803	-2.16578
GPSM2	-0.726367	0.604424	4.76181	-3.6002	0.00803591	0.0926803	-2.37542
LAMC1	-0.496357	0.708895	7.36774	-3.60047	0.00803298	0.0926803	-2.76787
DTNA	0.562147	1.47647	6.21937	3.60075	0.00802983	0.0926803	-2.61193
PCGF5	-0.49024	0.711907	6.99724	-3.59785	0.00806199	0.0927047	-2.72436
YWHAZ	-0.354684	0.782041	10.3709	-3.59542	0.00808896	0.0929206	-3.05439
TOP2B	0.444123	1.36049	7.41867	3.58523	0.00820331	0.0931023	-2.79616
SBSN	1.42376	2.68284	3.14235	3.58555	0.00819978	0.0931023	-2.1934
SLC39A10	-0.91783	0.529305	5.35057	-3.58559	0.00819932	0.0931023	-2.49427
CDHR1	2.46255	5.51189	1.97787	3.58644	0.00818964	0.0931023	-2.24514
PRPF18	-1.17569	0.442671	4.14406	-3.58716	0.0081816	0.0931023	-2.29723
SLC23A2	-0.896757	0.537093	6.26742	-3.58773	0.00817516	0.0931023	-2.63759
RPL4P6	-3.20613	0.108358	0.984865	-3.58816	0.00817029	0.0931023	-2.58561
CCDC186	-0.8696	0.547298	4.90512	-3.58855	0.00816587	0.0931023	-2.41524
PSMC4	0.456353	1.37207	7.68392	3.58982	0.00815166	0.0931023	-2.82048
BAZ1A	0.505116	1.41924	6.48915	3.59023	0.00814703	0.0931023	-2.66602
FAM46A	-0.876993	0.544501	4.45803	-3.59113	0.00813693	0.0931023	-2.33921
PGAM1	-0.353808	0.782516	9.92069	-3.59174	0.00813003	0.0931023	-3.02312
FOXF2	0.812317	1.75603	4.37534	3.5829	0.0082297	0.0931221	-2.33766
RP11-484L7.1	2.47983	5.57831	1.64095	3.58343	0.00822377	0.0931221	-2.33264
EHBP1L1	0.482869	1.39752	7.09249	3.58367	0.00822101	0.0931221	-2.75726
GOT2P3	-1.35772	0.390198	4.13707	-3.58166	0.00824382	0.0931888	-2.30364
RP11-129H15.4	-0.920941	0.528164	4.14226	-3.58054	0.00825654	0.0932397	-2.30589
FAM63B	-0.799773	0.57444	5.13219	-3.57914	0.00827259	0.0933279	-2.46664
DPYD	1.90771	3.75213	2.54188	3.5771	0.00829584	0.0934972	-2.1954
TRIM41	0.556856	1.47106	6.27057	3.5744	0.00832679	0.0937528	-2.65712
NKX2-3	-2.97397	0.127276	0.687993	-3.57168	0.00835809	0.0939188	-2.73556
COX20P2	1.19214	2.28491	3.34184	3.57174	0.00835741	0.0939188	-2.22473
PRKCA	-0.670127	0.628451	5.59712	-3.57092	0.0083669	0.0939247	-2.55602
NEK1	-0.687518	0.620921	6.05678	-3.56822	0.00839812	0.0939959	-2.6337
ARHGEF19	1.02847	2.03986	3.71656	3.56826	0.00839769	0.0939959	-2.26652
LRRC8E	-1.68309	0.311415	2.26152	-3.56837	0.00839642	0.0939959	-2.22428
STX11	-1.75987	0.295274	4.51409	-3.56617	0.00842197	0.09417	-2.38238
RP5-972B16.2	0.729979	1.65862	5.61949	3.55924	0.00850306	0.0942401	-2.57628
TCEB2	0.411763	1.33031	8.62291	3.55949	0.0085001	0.0942401	-2.95954
AGPAT4	0.683131	1.60562	5.36907	3.56052	0.00848804	0.0942401	-2.53271
EPN3	0.946755	1.92753	4.2118	3.56073	0.00848556	0.0942401	-2.34298
MSN	-0.388067	0.764153	9.06884	-3.56116	0.00848051	0.0942401	-2.99645
LRRC41	0.435564	1.35244	7.36702	3.56172	0.00847397	0.0942401	-2.82383
ROMO1	0.648344	1.56737	6.65598	3.56226	0.00846762	0.0942401	-2.72948
SLC36A1	-1.87283	0.273038	2.98063	-3.56419	0.00844507	0.0942401	-2.21236
UBC	0.383004	1.30405	10.6091	3.56468	0.00843934	0.0942401	-3.11852
RP1-28C20.1	-1.26342	0.416556	2.84717	-3.55829	0.00851425	0.094272	-2.21574
PEBP1P2	0.445136	1.36144	8.28473	3.5554	0.00854835	0.0945572	-2.9336
NHSL1	-0.869492	0.54734	4.80001	-3.55441	0.00855996	0.0945934	-2.44525
SEC22B	-0.485191	0.714402	7.26545	-3.55161	0.00859328	0.0946847	-2.82583
GJA1	-0.436265	0.739046	8.47676	-3.55204	0.00858806	0.0946847	-2.95692
CTIF	-0.746627	0.595995	4.80812	-3.55217	0.00858661	0.0946847	-2.44974
SUCO	-0.525363	0.694784	7.54905	-3.54986	0.00861406	0.0948215	-2.86295
ARF3	-0.559134	0.67871	7.54768	-3.54837	0.00863185	0.0949252	-2.86496
CDK16	-0.388258	0.764052	8.32404	-3.54446	0.00867863	0.0953472	-2.9534
RPL13A	0.461278	1.37676	10.5175	3.54328	0.00869291	0.0954117	-3.14256
MAPK12	-2.19581	0.218271	1.77349	-3.53974	0.00873561	0.0954184	-2.33837
ABHD14B	0.810317	1.7536	4.68836	3.53993	0.00873326	0.0954184	-2.44692
KLHL24	-0.776082	0.583951	6.16456	-3.54026	0.00872932	0.0954184	-2.6902
PPT2	0.525804	1.43974	6.52022	3.54036	0.00872803	0.0954184	-2.74208
ZNF347	1.11012	2.15863	3.31914	3.54228	0.00870487	0.0954184	-2.26068
THOC1	0.609817	1.52607	6.01794	3.53641	0.00877598	0.0957671	-2.67314
TMEM30A	-0.40306	0.756252	8.30754	-3.53303	0.00881724	0.0961249	-2.96846
GAPDHP44	0.347315	1.27219	9.4687	3.53144	0.00883665	0.0962439	-3.07388
SBNO2	0.379445	1.30084	8.36166	3.52725	0.00888812	0.0963418	-2.98218
MBTPS2	-0.725487	0.604793	5.14349	-3.52729	0.00888758	0.0963418	-2.5414
PSMA2	0.38593	1.3067	8.16267	3.52785	0.00888069	0.0963418	-2.96161
GSTM5	0.392394	1.31257	8.33025	3.52913	0.00886501	0.0963418	-2.97639
AKAP10	-0.990909	0.50316	4.59037	-3.52996	0.00885482	0.0963418	-2.44458
ANXA2	0.394942	1.31489	9.84512	3.52619	0.00890126	0.0963921	-3.11288
PITRM1	-0.69517	0.617636	4.91649	-3.52506	0.00891517	0.0964506	-2.50576
RUNDC3A	-1.48138	0.358147	3.382	-3.52308	0.00893967	0.0965314	-2.29085
TNFAIP3	-0.675013	0.626327	5.02661	-3.52335	0.0089363	0.0965314	-2.5269
USP1	-0.88483	0.541551	5.54688	-3.52153	0.00895891	0.0966472	-2.61775
EEF1B2P6	-5.21375	0.0269467	-0.970135	-3.51957	0.00898329	0.096818	-3.5253
FTH1	0.34792	1.27272	10.0516	3.51796	0.00900348	0.0968515	-3.14194
AC069368.3	-0.973357	0.509319	4.53818	-3.51815	0.00900107	0.0968515	-2.45248
RP11-674I16.1	0.847916	1.7999	4.42879	3.51645	0.00902227	0.0969616	-2.43708
SSBP4	-0.708156	0.612102	5.01714	-3.51107	0.00908998	0.0971369	-2.54256
PABPC3	-0.383401	0.766628	8.42197	-3.51161	0.00908314	0.0971369	-3.01078
ADAM9	0.703902	1.6289	7.04881	3.51195	0.0090789	0.0971369	-2.8553
MATN4	5.41634	42.7051	-1.26153	3.51212	0.00907675	0.0971369	-3.63099
RAP1GAP2	-1.49157	0.355625	2.98166	-3.51218	0.00907598	0.0971369	-2.27711
ANKHD1-EIF4EBP3	-2.79723	0.143863	4.63443	-3.51414	0.00905133	0.0971369	-2.47379
SESN3	0.76235	1.69625	4.69007	3.5054	0.00916185	0.0973543	-2.4952
SYT17	-1.28755	0.409647	3.13639	-3.50544	0.00916138	0.0973543	-2.2942
NOS1AP	1.61671	3.06676	2.3181	3.50553	0.00916022	0.0973543	-2.29048
AP1AR	-0.857705	0.55183	4.0838	-3.50583	0.00915643	0.0973543	-2.39855
AHNAK2	-1.2544	0.419169	3.147	-3.50776	0.00913194	0.0973543	-2.29196
ANTXR2	0.701184	1.62584	5.4921	3.5085	0.00912251	0.0973543	-2.6271
PACSIN3	0.908891	1.8776	5.06847	3.50151	0.00921163	0.0977916	-2.5648
RNF103	0.530222	1.44415	7.13918	3.49648	0.00927619	0.0981096	-2.88966
EIF3M	0.419658	1.33761	8.01246	3.49649	0.00927617	0.0981096	-2.99194
PHLDB2	0.540246	1.45422	6.24372	3.49703	0.00926912	0.0981096	-2.76435
PUM3	-0.541199	0.687199	6.71944	-3.49811	0.00925522	0.0981096	-2.83088
UPRT	-1.76066	0.295114	2.30628	-3.48327	0.00944837	0.0987333	-2.31679
HLCS	-0.971034	0.51014	4.06577	-3.48369	0.00944292	0.0987333	-2.42598
MOV10	0.654066	1.5736	5.04991	3.4841	0.00943753	0.0987333	-2.58614
CCNI	0.339418	1.26525	9.72921	3.48467	0.00943	0.0987333	-3.1643
SLC1A4	-0.477873	0.718035	6.56013	-3.48477	0.00942863	0.0987333	-2.82797
MFSD5	0.495971	1.41027	7.43902	3.48493	0.00942664	0.0987333	-2.94437
RASD2	-5.06094	0.0299574	-1.05035	-3.48586	0.00941436	0.0987333	-3.56836
TBCK	-1.31034	0.403225	4.03832	-3.48594	0.00941328	0.0987333	-2.41891
MPP5	-0.577558	0.670097	5.9415	-3.48705	0.00939881	0.0987333	-2.73183
TRIM28	0.504845	1.41897	6.65529	3.4871	0.00939821	0.0987333	-2.83797
SP100	1.21441	2.32046	3.15213	3.48791	0.00938756	0.0987333	-2.31754
LRFN4	0.600615	1.51636	6.74832	3.48817	0.00938411	0.0987333	-2.84927
BAG3	0.423427	1.34111	8.59556	3.48869	0.00937732	0.0987333	-3.06055
CKMT1B	1.50269	2.8337	2.52191	3.48071	0.0094822	0.0989045	-2.30956
TULP4	-0.400041	0.757837	7.74987	-3.48076	0.00948147	0.0989045	-2.9866
CEP250	0.611262	1.52759	5.49112	3.47933	0.00950045	0.0989129	-2.66849
CCAR2	0.725184	1.65311	4.67832	3.47936	0.00950009	0.0989129	-2.52954
TMA16	-1.1528	0.44975	3.18767	-3.47775	0.0095214	0.0989492	-2.33306
CMTR2	-4.17172	0.0554863	-0.232927	-3.47826	0.00951462	0.0989492	-3.22422
ICK	-1.33455	0.396517	2.81042	-3.47066	0.00961592	0.0992041	-2.32242
AAED1	-0.891617	0.53901	5.10592	-3.47068	0.00961575	0.0992041	-2.61483
BCOR	0.457439	1.3731	6.88726	3.47092	0.00961251	0.0992041	-2.89332
TNFRSF1A	0.875857	1.8351	4.39517	3.47196	0.00959855	0.0992041	-2.49308
REEP1	-4.95163	0.0323154	0.919654	-3.47268	0.00958885	0.0992041	-2.70316
GDA	-1.80188	0.286801	1.8282	-3.47279	0.00958743	0.0992041	-2.39415
B4GALT5	-0.591927	0.663456	5.60495	-3.47389	0.00957276	0.0992041	-2.69548
CTNNB1	0.298636	1.22998	10.8666	3.47494	0.00955878	0.0992041	-3.27102
CSRP3	-4.16797	0.0556311	-0.234094	-3.46978	0.00962778	0.0992361	-3.22884
YARS	-0.496927	0.708614	6.41062	-3.46493	0.00969318	0.0995483	-2.83533
MTHFD2P3	-3.60741	0.082047	0.139654	-3.46531	0.00968805	0.0995483	-3.06024
SMAD3	-1.06075	0.479382	4.87089	-3.46562	0.00968384	0.0995483	-2.58137
RAB11FIP5	-0.714737	0.609316	7.26814	-3.46645	0.00967259	0.0995483	-2.94999
NUPR1	0.633225	1.55103	5.26537	3.45917	0.00977136	0.0996292	-2.65873
FHL1	1.74752	3.35782	2.30896	3.45939	0.00976837	0.0996292	-2.34399
AC012066.1	0.769722	1.70494	4.60918	3.4598	0.00976277	0.0996292	-2.54515
FLRT2	0.693836	1.61758	5.00296	3.46022	0.00975704	0.0996292	-2.61178
EMC6	0.576048	1.49076	6.00321	3.46029	0.0097562	0.0996292	-2.78015
TP53INP1	0.671602	1.59284	5.84325	3.46142	0.00974079	0.0996292	-2.75277
SREBF2	-0.352073	0.783458	8.88356	-3.46159	0.00973841	0.0996292	-3.12622
LAMC2	-0.929534	0.525028	4.54009	-3.46248	0.00972636	0.0996292	-2.52998
MIB1	-0.601021	0.659287	6.06457	-3.45586	0.00981675	0.0996439	-2.79628
TMCC1	0.624134	1.54129	5.35631	3.45622	0.00981178	0.0996439	-2.67849
MEX3B	-1.60169	0.329491	3.06099	-3.45668	0.00980547	0.0996439	-2.35119
PHGDH	-0.38322	0.766725	8.63233	-3.45722	0.00979799	0.0996439	-3.11014
MMD	-1.64259	0.320282	3.19738	-3.45788	0.00978909	0.0996439	-2.35926
SCAF1	0.491779	1.40618	7.08594	3.45144	0.00987752	0.099814	-2.94826
SNRPFP1	0.534024	1.44796	6.23237	3.45159	0.00987546	0.099814	-2.82828
TRAF6	-0.756583	0.591897	4.9386	-3.45202	0.00986951	0.099814	-2.61221
DLG1	-0.396413	0.759745	7.74657	-3.45273	0.00985964	0.099814	-3.02725
KIAA1191	-0.700066	0.615544	5.55942	-3.45373	0.0098459	0.099814	-2.71661
CHST12	0.546662	1.4607	5.94187	3.45045	0.00989117	0.099863	-2.78455
TUBE1	1.49751	2.82355	2.49869	3.44822	0.0099221	0.0999971	-2.34863
CAPZA1	-0.457927	0.728032	7.43379	-3.44878	0.00991426	0.0999971	-2.99652
ORMDL2	-0.776376	0.583832	4.36666	-3.44698	0.0099392	0.100081	-2.523
RP11-344L21.1	0.472682	1.38769	6.84442	3.44629	0.00994888	0.100089	-2.92337
NIT2	0.994268	1.99207	4.05194	3.44484	0.00996907	0.100115	-2.4768
P2RX2	-4.14731	0.0564331	-0.245365	-3.4449	0.00996816	0.100115	-3.24593
ADAMTS1	1.14434	2.21045	4.00675	3.44314	0.00999278	0.100264	-2.47241
RP11-829H16.2	0.919906	1.89199	4.19719	3.44137	0.0100176	0.100424	-2.50371
GTF2B	0.525987	1.43992	6.30271	3.43933	0.0100462	0.100533	-2.85652
GBP3	-1.04949	0.483139	3.55776	-3.43964	0.0100419	0.100533	-2.41814
DCUN1D1	-0.543471	0.686118	5.83704	-3.43576	0.0100966	0.100859	-2.78868
HDLBP	-0.371729	0.772856	10.2746	-3.43602	0.0100928	0.100859	-3.28096
TMEM19	-0.890776	0.539324	4.23562	-3.43108	0.0101629	0.101432	-2.5239
ZKSCAN3	0.754919	1.68754	4.75248	3.42898	0.0101928	0.101552	-2.61255
RBM4	0.898112	1.86363	5.45943	3.42908	0.0101914	0.101552	-2.73496
RAB10	-0.612974	0.653847	8.35057	-3.42818	0.0102043	0.101577	-3.12636
CMIP	-0.448346	0.732883	7.57898	-3.42656	0.0102274	0.101628	-3.04643
CDH17	-0.598989	0.660216	6.14231	-3.42661	0.0102268	0.101628	-2.85056
CCT8	0.404463	1.3236	8.66753	3.42397	0.0102646	0.101909	-3.16231
PDPK1	-0.671732	0.627753	5.25633	-3.4226	0.0102843	0.102015	-2.70922
CHFR	0.634089	1.55196	5.3347	3.42134	0.0103025	0.102018	-2.72456
MC1R	0.571466	1.48603	5.62409	3.42195	0.0102937	0.102018	-2.77312
REEP3	-0.530424	0.692351	6.24621	-3.41997	0.0103224	0.102125	-2.87615
RANBP1	0.450077	1.36611	6.89371	3.41815	0.0103486	0.102206	-2.97108
NEDD8	0.412099	1.33062	7.40078	3.41829	0.0103467	0.102206	-3.03706
CCNY	-0.531759	0.691711	6.27937	-3.41395	0.0104098	0.102365	-2.88983
TTC17	-0.580033	0.668949	6.68071	-3.41406	0.0104082	0.102365	-2.94768
C1orf123	0.690138	1.61344	5.3174	3.41421	0.010406	0.102365	-2.7318
SFXN5	-4.61061	0.0409325	-0.550964	-3.41463	0.0103999	0.102365	-3.39235
IVNS1ABP	-0.361491	0.77836	8.44331	-3.41484	0.0103968	0.102365	-3.15489
ATRN	-0.504684	0.704815	6.33067	-3.41137	0.0104476	0.102469	-2.90129
AGPS	-0.504861	0.704728	6.2075	-3.41186	0.0104404	0.102469	-2.88205
ZEB2	0.415465	1.33373	7.41229	3.41248	0.0104313	0.102469	-3.047
NAA50	-0.40581	0.754812	7.77376	-3.40869	0.0104869	0.102677	-3.09491
KRT8	2.31678	4.98221	1.27116	3.40898	0.0104827	0.102677	-2.61777
CD2AP	-0.618664	0.651274	6.79827	-3.40774	0.0105009	0.102725	-2.97324
FKBP5	-0.587238	0.665616	5.76401	-3.40475	0.0105451	0.10298	-2.82141
RP11-80H5.5	-4.60653	0.0410484	-0.554922	-3.40492	0.0105425	0.10298	-3.39816
SNX30	-0.951333	0.517155	4.33667	-3.40285	0.0105732	0.102989	-2.5792
TTC39A	1.01731	2.02414	3.95317	3.40286	0.0105731	0.102989	-2.51938
RAB6A	-0.436669	0.738839	7.5308	-3.40392	0.0105574	0.102989	-3.07391
UBE4B	-0.418348	0.748281	7.73733	-3.402	0.0105859	0.103024	-3.10067
RP11-482L11.1	0.705694	1.63093	4.8584	3.4013	0.0105963	0.103037	-2.66988
RNF38	-0.594038	0.662486	5.53439	-3.4002	0.0106126	0.103107	-2.78908
PLEKHA2	-0.487007	0.713504	6.97394	-3.39536	0.010685	0.103191	-3.0153
MUT	-0.957508	0.514946	5.2875	-3.39543	0.0106841	0.103191	-2.75348
SDHB	0.59103	1.50632	5.72837	3.39581	0.0106784	0.103191	-2.82832
GJA6P	-1.41582	0.374797	2.57156	-3.39654	0.0106674	0.103191	-2.40961
CAPN5	-1.33278	0.397003	3.17773	-3.39742	0.0106542	0.103191	-2.43548
CBX1	-0.599998	0.659755	5.33837	-3.39835	0.0106403	0.103191	-2.75806
MAPK14	-0.697453	0.61666	5.49775	-3.39846	0.0106386	0.103191	-2.78533
NPEPL1	0.549601	1.46368	6.27595	3.39432	0.0107007	0.103255	-2.91783
RAB11FIP1	-1.81384	0.284434	2.48482	-3.39369	0.0107102	0.103258	-2.41376
GTF3C1	-1.02933	0.489936	3.36142	-3.39241	0.0107294	0.103356	-2.45903
TGM2	-0.815811	0.568089	4.23106	-3.39034	0.0107608	0.103483	-2.57939
RNASEK	0.429046	1.34634	7.3338	3.39079	0.0107539	0.103483	-3.06901
CD180	0.7653	1.69972	4.78482	3.38959	0.010772	0.103503	-2.67362
MKNK1	-0.794655	0.576481	4.39931	-3.38698	0.0108117	0.103621	-2.6116
TXNDC15	0.715012	1.6415	4.71328	3.38708	0.0108102	0.103621	-2.66479
LIN7C	-0.670572	0.628258	5.7044	-3.3881	0.0107947	0.103621	-2.83538
MPV17	-0.553922	0.681166	6.02119	-3.38352	0.0108645	0.103775	-2.89404
ELK3	-0.468973	0.722479	6.53959	-3.38387	0.010859	0.103775	-2.97176
ANXA6	0.419959	1.33789	7.38945	3.38412	0.0108552	0.103775	-3.08577
PDE8A	-0.761661	0.589817	4.61597	-3.38446	0.0108501	0.103775	-2.65173
NDUFA12	0.513894	1.4279	6.6875	3.38264	0.0108779	0.103816	-2.99449
EEA1	-0.623336	0.649168	5.79701	-3.38178	0.0108911	0.103855	-2.85999
RPS16P9	0.380725	1.302	8.93638	3.38081	0.010906	0.103909	-3.25007
SIAH2	-0.585487	0.666424	5.79856	-3.37968	0.0109233	0.103987	-2.86327
IQCB1	0.805437	1.74767	4.20431	3.37219	0.0110391	0.104388	-2.60017
ZDHHC24	1.06671	2.09466	3.44371	3.37249	0.0110344	0.104388	-2.4941
ZNF830	-2.61109	0.163676	0.889791	-3.3731	0.0110249	0.104388	-2.79285
ENPP4	-1.58549	0.333212	2.21241	-3.37364	0.0110166	0.104388	-2.44895
ARHGAP18	-0.583445	0.667368	5.45537	-3.37369	0.0110158	0.104388	-2.81372
STX3	0.820638	1.76619	4.44507	3.37474	0.0109996	0.104388	-2.63629
CEP76	-1.23377	0.425204	2.76445	-3.37504	0.0109949	0.104388	-2.43922
PRNP	0.482225	1.3969	7.68131	3.37615	0.0109777	0.104388	-3.1323
SPRED1	-0.75134	0.594052	6.6937	-3.36769	0.0111093	0.104877	-3.01722
EBAG9	-1.01742	0.493998	4.26975	-3.36812	0.0111026	0.104877	-2.61637
ZYX	0.580338	1.4952	6.04916	3.36496	0.0111522	0.105019	-2.92546
LOX	-0.336558	0.791929	9.1409	-3.36503	0.011151	0.105019	-3.29129
DHRS3	1.56106	2.95071	3.69364	3.36542	0.0111449	0.105019	-2.53395
SNX25	0.598179	1.5138	5.73814	3.36428	0.0111629	0.105033	-2.87552
FAM149B1	-1.37598	0.38529	2.96647	-3.36309	0.0111815	0.105034	-2.46404
B4GAT1	0.441583	1.35809	7.63551	3.36323	0.0111793	0.105034	-3.1461
RP11-512F24.1	-0.999286	0.500248	3.94528	-3.36145	0.0112074	0.10519	-2.57469
ZNF622	0.449396	1.36547	7.15357	3.36043	0.0112235	0.105254	-3.09043
TMEM150A	0.468309	1.38349	7.01336	3.35838	0.011256	0.105297	-3.07479
GALNT7	-0.46913	0.7224	6.56454	-3.35855	0.0112533	0.105297	-3.01228
SEC24D	-0.417688	0.748623	7.44896	-3.35897	0.0112466	0.105297	-3.13018
TIMP2	0.341586	1.26715	9.68279	3.35468	0.011315	0.105501	-3.35265
FOXK1	-0.754415	0.592787	4.62241	-3.35499	0.0113101	0.105501	-2.69429
SARS	-0.309981	0.806653	10.0409	-3.35518	0.011307	0.105501	-3.38167
KRT15	-2.35808	0.195051	1.27603	-3.35527	0.0113056	0.105501	-2.66399
GPAM	-2.65372	0.15891	1.4159	-3.34703	0.0114378	0.105777	-2.62683
SLC38A7	-0.691276	0.619306	5.84228	-3.34716	0.0114357	0.105777	-2.9176
DTX4	-0.970621	0.510286	3.68979	-3.34746	0.0114308	0.105777	-2.55762
RP13-1056D16.2	-3.06116	0.119812	0.80521	-3.34839	0.0114158	0.105777	-2.84596
ARPC5L	-0.656991	0.6342	6.29281	-3.34888	0.0114079	0.105777	-2.98655
TMED4	-0.629398	0.646446	5.38629	-3.34888	0.0114078	0.105777	-2.83735
HTT	-0.457497	0.728249	6.81956	-3.34978	0.0113934	0.105777	-3.061
CIAPIN1	-0.723622	0.605575	5.12359	-3.34979	0.0113932	0.105777	-2.78985
ANKRD34A	1.52146	2.87081	2.27375	3.35058	0.0113806	0.105777	-2.47175
SRRM4	0.803046	1.74478	4.40686	3.3507	0.0113786	0.105777	-2.66346
NRCAM	-1.44287	0.367834	2.88042	-3.34402	0.0114865	0.105796	-2.48315
DDX58	-1.01687	0.494188	3.94558	-3.34443	0.0114798	0.105796	-2.59801
LANCL3	-1.63126	0.322806	2.18541	-3.34457	0.0114776	0.105796	-2.48419
MED21	0.701422	1.62611	5.33505	3.3446	0.0114771	0.105796	-2.83458
THRA	0.495205	1.40952	8.03363	3.34539	0.0114643	0.105796	-3.21633
STK24	-1.0011	0.49962	3.76343	-3.34176	0.0115231	0.105961	-2.57536
FRYL	-0.565	0.675955	5.84218	-3.34219	0.0115162	0.105961	-2.9248
AP2A2	-0.417655	0.748641	7.62161	-3.33874	0.0115725	0.10607	-3.18064
SYVN1	-0.549201	0.683398	7.46299	-3.33876	0.0115721	0.10607	-3.16168
AXL	-0.396671	0.759609	7.79211	-3.33911	0.0115664	0.10607	-3.19946
SAMD14	0.668929	1.58989	4.8034	3.33972	0.0115565	0.10607	-2.74745
MTA3	0.583528	1.49851	6.05352	3.33711	0.0115992	0.106143	-2.96666
AHCTF1	-0.945686	0.519182	4.33692	-3.33733	0.0115955	0.106143	-2.67037
GNPTAB	-0.709068	0.611715	5.92966	-3.33262	0.0116729	0.106303	-2.95316
PAK6	2.91259	7.5297	0.576219	3.33272	0.0116714	0.106303	-2.95145
KALRN	0.484085	1.3987	6.47291	3.33295	0.0116676	0.106303	-3.03655
SUPV3L1	0.584346	1.49936	5.67155	3.33339	0.0116603	0.106303	-2.90885
DOCK11	0.523598	1.43754	5.90022	3.3339	0.0116518	0.106303	-2.94648
DNM1	-0.503681	0.705305	7.08425	-3.33518	0.0116309	0.106303	-3.11837
ARHGEF2	-0.560825	0.677914	6.66035	-3.33098	0.0117001	0.106465	-3.06629
SCYL2	-0.507227	0.703574	6.14419	-3.32959	0.0117231	0.106503	-2.99184
PLEKHH3	0.594758	1.51022	5.81116	3.32965	0.0117221	0.106503	-2.93784
TSPAN9	-0.804286	0.572645	4.80941	-3.32832	0.0117441	0.106609	-2.76468
GNAS	0.264961	1.2016	11.7055	3.3258	0.011786	0.106733	-3.55728
CYP26B1	-1.74222	0.29891	2.0377	-3.32634	0.011777	0.106733	-2.51806
FMNL2	-0.629365	0.646461	6.46237	-3.32687	0.0117683	0.106733	-3.04389
PRPF39	0.421988	1.33977	7.16608	3.32396	0.0118167	0.106841	-3.14571
KIF21B	-0.455281	0.729368	6.67412	-3.32416	0.0118135	0.106841	-3.07825
VRK1	-0.911302	0.531705	3.82217	-3.32336	0.0118268	0.106846	-2.60861
TMBIM6	0.59152	1.50683	7.15915	3.31986	0.0118855	0.107292	-3.15086
TUBB4BP2	0.988465	1.98407	3.96546	3.3156	0.0119574	0.107342	-2.64054
CLINT1	-0.400052	0.757831	7.75905	-3.31581	0.0119538	0.107342	-3.23024
EMP1	-0.716266	0.608671	4.63831	-3.31631	0.0119455	0.107342	-2.75164
MAMDC2	-1.49951	0.353673	2.48951	-3.31723	0.01193	0.107342	-2.50544
UBL5	0.43381	1.3508	7.24204	3.31748	0.0119257	0.107342	-3.16515
CNPY2	0.44943	1.3655	7.52722	3.31765	0.0119227	0.107342	-3.20053
AKR7A2	0.745765	1.67686	4.62177	3.31827	0.0119123	0.107342	-2.74595
SUSD6	-0.395262	0.760351	7.67699	-3.31283	0.0120044	0.107679	-3.22526
UTP11	0.568693	1.48318	6.08729	3.30971	0.0120576	0.10807	-3.01193
FAM84B	-1.1833	0.440342	3.16157	-3.30196	0.0121908	0.10892	-2.55784
NKAIN1	-2.26901	0.207472	2.90012	-3.30205	0.0121892	0.10892	-2.53742
NCL	0.317911	1.24652	9.69273	3.30233	0.0121844	0.10892	-3.43137
KCNJ14	1.22423	2.33631	3.77668	3.30267	0.0121786	0.10892	-2.6303
ACE2	1.26357	2.4009	2.88272	3.30042	0.0122175	0.108987	-2.53843
TBC1D5	-0.882132	0.542565	4.6741	-3.30082	0.0122105	0.108987	-2.77988
DHFRL1	1.13386	2.19445	2.99755	3.29875	0.0122464	0.109073	-2.54831
PRIM2	1.5199	2.8677	2.19114	3.2991	0.0122404	0.109073	-2.536
COPZ1	-0.52896	0.693054	6.62643	-3.29773	0.0122641	0.109145	-3.11026
PFN1P1	0.576493	1.49122	5.78802	3.29242	0.0123569	0.109798	-2.9881
COX8A	0.883154	1.8444	6.90329	3.29284	0.0123496	0.109798	-3.15622
MACROD2	-1.46334	0.362654	2.35987	-3.28989	0.0124013	0.110107	-2.53974
PRKAA2	-1.9522	0.258421	2.63441	-3.28868	0.0124226	0.110123	-2.54213
TMEM184B	-0.385414	0.765559	8.14096	-3.28877	0.0124211	0.110123	-3.31139
APLN	-0.928674	0.525341	4.88179	-3.28759	0.0124419	0.110208	-2.8355
NSD1	0.514885	1.42888	5.92704	3.28556	0.0124778	0.11044	-3.02128
ARMCX2	1.76224	3.39224	2.6672	3.28436	0.0124992	0.110456	-2.54847
DLX2	0.662658	1.583	5.60176	3.28441	0.0124983	0.110456	-2.96796
CCNT2	0.521323	1.43527	6.62606	3.28168	0.0125468	0.110705	-3.13381
SMAP2	-0.55786	0.679309	5.85833	-3.28194	0.0125422	0.110705	-3.01514
PKP4	0.445367	1.36166	7.0355	3.28003	0.0125762	0.110878	-3.1931
AC090094.1	0.813105	1.75699	4.11353	3.27942	0.0125872	0.110889	-2.71394
NFIX	0.445279	1.36158	8.40676	3.27334	0.0126964	0.110988	-3.36093
ID1	0.395082	1.31502	8.07186	3.27364	0.0126909	0.110988	-3.32668
MAP3K1	-0.557129	0.679654	6.19846	-3.27369	0.0126901	0.110988	-3.08212
PAXBP1	0.469292	1.38443	6.51991	3.27435	0.0126781	0.110988	-3.12936
ITGB1P1	0.390613	1.31095	8.37171	3.27546	0.0126581	0.110988	-3.35439
NDRG4	-0.50133	0.706455	5.9792	-3.27549	0.0126576	0.110988	-3.04445
SLC25A1	0.430355	1.34757	7.60635	3.27549	0.0126575	0.110988	-3.27242
GSTM3	0.573251	1.48787	5.36126	3.27677	0.0126346	0.110988	-2.93693
BRDT	2.71201	6.55235	0.680855	3.27748	0.0126218	0.110988	-2.94882
MFSD14C	-2.02107	0.246376	1.65854	-3.27755	0.0126205	0.110988	-2.63193
FBXW11	-0.395309	0.760327	7.48135	-3.27007	0.0127555	0.110991	-3.26542
FDXR	0.812436	1.75617	4.06458	3.2702	0.0127532	0.110991	-2.71885
CHKA	-0.550839	0.682623	6.22886	-3.27047	0.0127483	0.110991	-3.09157
ZMIZ2	-0.527607	0.693705	5.83611	-3.27072	0.0127437	0.110991	-3.02775
GLTSCR2	0.791448	1.73081	5.88328	3.27081	0.0127421	0.110991	-3.03555
EP300	-0.380385	0.768233	7.63174	-3.27119	0.0127352	0.110991	-3.28174
NHLRC3	-0.853242	0.553539	3.93976	-3.26855	0.0127831	0.111146	-2.70132
SYNGR2	0.546724	1.46077	6.31547	3.26746	0.0128029	0.111233	-3.10916
ALDOB	0.766162	1.70074	5.24109	3.26686	0.0128138	0.111243	-2.92989
BPIFB4	0.729264	1.65779	4.7638	3.26485	0.0128506	0.111306	-2.84682
MMAA	0.650291	1.56948	4.83569	3.26519	0.0128443	0.111306	-2.85927
MMP10	-0.911418	0.531662	3.75075	-3.26546	0.0128393	0.111306	-2.67729
CXXC5	0.389109	1.30958	7.54757	3.26349	0.0128755	0.111437	-3.28316
BEND5	-1.30937	0.403497	3.77923	-3.2622	0.012899	0.111471	-2.68585
NFKBIL1	0.693241	1.61691	4.6125	3.26252	0.0128933	0.111471	-2.82323
PKMYT1	1.26796	2.4082	2.61937	3.25985	0.0129423	0.111759	-2.57732
INF2	-0.389143	0.763583	7.84854	-3.25844	0.0129682	0.111813	-3.3252
SI	1.35875	2.56464	2.91915	3.25863	0.0129648	0.111813	-2.59404
DSC2	-3.34802	0.0982074	0.339644	-3.25702	0.0129945	0.111869	-3.10018
RP11-636N17.1	1.1877	2.27789	3.44447	3.25715	0.0129922	0.111869	-2.64762
RP11-367O10.1	-0.723496	0.605628	4.43961	-3.25338	0.0130621	0.111941	-2.80571
SLC25A3	0.337678	1.26372	9.66096	3.25353	0.0130593	0.111941	-3.50155
IL13RA1	-0.517554	0.698555	6.75269	-3.25358	0.0130584	0.111941	-3.19315
MRPL51	0.798546	1.73935	4.90439	3.25423	0.0130463	0.111941	-2.88726
CASK	-0.435084	0.739651	7.36738	-3.25504	0.0130313	0.111941	-3.27349
PRPF4B	0.392824	1.31296	7.46303	3.25571	0.0130189	0.111941	-3.28451
ZDHHC7	-1.0229	0.492126	3.24967	-3.25062	0.0131135	0.112296	-2.6339
PLEC	0.348255	1.27302	9.12221	3.24537	0.0132121	0.113055	-3.46772
CCAR1	0.389669	1.31009	7.53249	3.24468	0.0132249	0.11308	-3.30924
HSP90AB1	-0.348426	0.785441	9.20928	-3.24381	0.0132413	0.113135	-3.47759
SKP1	0.350789	1.27526	8.47015	3.24244	0.0132672	0.113186	-3.41304
NPM1P9	5.14349	35.3464	-1.43409	3.24246	0.0132669	0.113186	-3.75963
PMEPA1	-0.502586	0.70584	6.34776	-3.24086	0.0132972	0.113356	-3.15318
PTPRU	1.70163	3.25269	2.38442	3.24027	0.0133083	0.113366	-2.59858
SMIM4	1.65644	3.15237	2.96853	3.23857	0.0133407	0.113386	-2.62349
AC110615.1	-0.801748	0.573654	4.20877	-3.23868	0.0133386	0.113386	-2.78663
INPP4A	-1.03943	0.486519	3.29754	-3.23887	0.013335	0.113386	-2.6547
ANXA3	0.494488	1.40882	6.28624	3.23641	0.0133818	0.113565	-3.1503
CAMK2B	0.855298	1.80913	4.26633	3.23685	0.0133734	0.113565	-2.79893
ZNF410	0.495327	1.40964	5.99347	3.23392	0.0134295	0.113629	-3.10762
B4GALT7	0.758566	1.69181	4.64483	3.23438	0.0134207	0.113629	-2.869
CELF3	2.44917	5.46101	1.13123	3.23458	0.0134167	0.113629	-2.81931
ZNF703	-0.453596	0.73022	6.98477	-3.23538	0.0134016	0.113629	-3.25227
NDRG2	-0.540715	0.68743	6.78169	-3.23321	0.013443	0.113659	-3.22733
NUP58	-0.532264	0.691469	5.69892	-3.23063	0.0134927	0.113825	-3.06295
B4GALNT1	1.07147	2.10158	3.86194	3.23103	0.013485	0.113825	-2.741
TARS	-0.550255	0.6829	7.08093	-3.23108	0.013484	0.113825	-3.27161
PKP3	0.532659	1.44659	5.62712	3.22478	0.0136057	0.114268	-3.05906
MIER1	-0.574342	0.671593	5.52216	-3.22507	0.0136003	0.114268	-3.04026
REXO1	0.467025	1.38226	6.67789	3.22508	0.0136	0.114268	-3.22466
DCXR	0.927224	1.90161	3.82727	3.22563	0.0135893	0.114268	-2.7431
ERAL1	1.05479	2.07742	3.44981	3.22588	0.0135845	0.114268	-2.6902
KDELR1	0.373124	1.29515	8.19457	3.22657	0.0135711	0.114268	-3.40948
SNRPB	0.432492	1.34956	8.04423	3.22206	0.0136588	0.114628	-3.40052
ARHGAP26	-1.33639	0.39601	2.97913	-3.219	0.0137187	0.114961	-2.6496
HTATIP2	0.432381	1.34946	7.47503	3.21902	0.0137182	0.114961	-3.34042
MAGI1	-0.527258	0.693872	6.42304	-3.21686	0.0137606	0.115057	-3.19974
SULF2	0.456987	1.37267	7.29979	3.21708	0.0137563	0.115057	-3.32125
ARL6IP4	0.859463	1.81436	4.64325	3.21726	0.0137526	0.115057	-2.89308
ARL10	-0.608823	0.655731	5.64119	-3.21632	0.0137712	0.115061	-3.07383
RP11-514O12.4	0.553597	1.46774	5.49066	3.215	0.0137973	0.115194	-3.04939
TOLLIP	-1.44378	0.367604	4.01196	-3.21412	0.0138145	0.115253	-2.78811
UBA6	-0.719519	0.6073	4.83749	-3.21252	0.0138461	0.115347	-2.93496
ADAMTS4	-0.914219	0.530631	3.58324	-3.21262	0.0138443	0.115347	-2.72563
NSFL1C	0.55602	1.47021	7.64143	3.21089	0.0138785	0.115532	-3.37243
CDC27	-0.48168	0.716143	6.75418	-3.20593	0.0139772	0.116183	-3.26377
PHB2	0.358573	1.28216	8.13262	3.20613	0.0139733	0.116183	-3.43353
RPS6KC1	-0.906553	0.533458	3.65009	-3.20208	0.0140544	0.116483	-2.74926
AGRN	-1.20504	0.433756	4.32656	-3.2021	0.0140541	0.116483	-2.85829
TUBB8	0.564825	1.47921	5.90169	3.20232	0.0140496	0.116483	-3.13884
USPL1	-2.49838	0.176975	1.49827	-3.20321	0.0140317	0.116483	-2.74347
CHAMP1	-1.09619	0.467749	3.03676	-3.2008	0.0140802	0.116526	-2.67814
TMEM120A	-0.96827	0.511119	4.05431	-3.20101	0.014076	0.116526	-2.81334
ATXN2	0.396694	1.31649	7.59768	3.2002	0.0140923	0.116542	-3.38324
FTLP17	2.4169	5.34022	0.974853	3.19916	0.0141134	0.116546	-2.90206
ERGIC3	0.357351	1.28107	9.03182	3.1995	0.0141065	0.116546	-3.52839
KIAA1715	-0.70544	0.613256	4.64278	-3.19242	0.0142502	0.116572	-2.92843
NTN1	-0.688994	0.620286	4.98177	-3.19277	0.014243	0.116572	-2.98971
B3GALNT1	1.82489	3.54281	2.28184	3.19322	0.0142338	0.116572	-2.65624
MCM7	0.59551	1.51101	5.39164	3.19369	0.0142243	0.116572	-3.06283
SPSB2	0.703767	1.62875	5.46753	3.19387	0.0142206	0.116572	-3.07612
MTCO1P24	1.30608	2.47268	2.5996	3.19408	0.0142163	0.116572	-2.6582
RNF4	-0.417007	0.748977	6.98867	-3.19459	0.014206	0.116572	-3.31324
TCF3	0.389788	1.3102	7.30733	3.19482	0.0142013	0.116572	-3.35529
WDR82P2	-1.34913	0.392529	3.34051	-3.19509	0.0141957	0.116572	-2.71791
RP11-176H8.1	-4.04513	0.060575	1.32669	-3.19523	0.014193	0.116572	-2.79569
PGD	0.415902	1.33413	7.14784	3.19577	0.0141819	0.116572	-3.33297
PKMP1	0.337904	1.26392	9.04294	3.19663	0.0141645	0.116572	-3.53365
FBXL12	-4.82284	0.0353329	-1.16688	-3.19804	0.014136	0.116572	-3.70729
TCEAL8	0.728019	1.65636	4.78792	3.19011	0.0142973	0.116789	-2.95804
PATL1	-0.607662	0.656259	6.36449	-3.19045	0.0142904	0.116789	-3.22999
CXorf56	-0.910569	0.531975	3.73632	-3.18724	0.0143564	0.11685	-2.78219
GTDC1	-1.62961	0.323175	2.39446	-3.18741	0.0143527	0.11685	-2.66223
SERF2	0.454001	1.36983	9.61627	3.18751	0.0143507	0.11685	-3.59666
GALK1	0.387328	1.30797	7.43951	3.188	0.0143405	0.11685	-3.38219
KCNC3	-3.91374	0.0663511	0.929934	-3.1886	0.0143284	0.11685	-2.92622
RASSF3	0.696804	1.62091	4.71098	3.18638	0.0143739	0.116909	-2.9494
C1orf198	-0.580408	0.668775	7.23767	-3.18515	0.0143994	0.116949	-3.36057
PPIL2	0.52258	1.43652	6.6103	3.18524	0.0143974	0.116949	-3.27383
EFNA5	0.501768	1.41595	6.02761	3.18394	0.0144243	0.117067	-3.18663
PPP1R15B	-0.760311	0.590369	4.49557	-3.18141	0.0144768	0.117409	-2.9176
SLC36A4	-1.31225	0.402693	2.5351	-3.17892	0.0145285	0.11766	-2.67488
HSPH1	0.504164	1.4183	7.41928	3.17933	0.01452	0.11766	-3.39256
PLEKHO1	0.436563	1.35338	7.01651	3.17841	0.0145392	0.117663	-3.34104
IMMP2L	1.43431	2.70254	2.71643	3.1749	0.0146124	0.118171	-2.68767
RPL3P2	-0.345332	0.787127	9.48301	-3.16798	0.0147582	0.118337	-3.61466
ZFHX3	0.587948	1.50311	6.45	3.16814	0.0147549	0.118337	-3.2757
AGO4	1.65348	3.14591	2.54556	3.16821	0.0147533	0.118337	-2.68843
PALLD	0.443449	1.35985	6.87471	3.16835	0.0147503	0.118337	-3.3364
ARHGAP29	-0.674284	0.626643	7.2867	-3.16939	0.0147283	0.118337	-3.39045
RPUSD4	-4.86102	0.0344101	-1.14677	-3.1697	0.0147218	0.118337	-3.71163
FKBP9P1	0.567181	1.48163	6.06271	3.17	0.0147155	0.118337	-3.21288
EIF3EP1	0.373595	1.29558	7.56211	3.17072	0.0147002	0.118337	-3.42287
SNX5	-0.318965	0.801645	9.09132	-3.17173	0.014679	0.118337	-3.57523
SAMHD1	-1.4051	0.377592	3.09477	-3.17195	0.0146744	0.118337	-2.72142
TMSB10	0.329932	1.25695	9.51981	3.17201	0.0146731	0.118337	-3.61175
RP11-744H18.1	1.2832	2.43378	2.8737	3.17263	0.0146601	0.118337	-2.701
GNB5	-0.946723	0.51881	3.65071	-3.16364	0.0148505	0.118825	-2.80184
NKAP	-0.982342	0.506157	3.6001	-3.16384	0.0148463	0.118825	-2.79433
SEH1L	-0.42966	0.742437	6.60255	-3.1639	0.0148448	0.118825	-3.3043
NRP2	-0.428215	0.743181	7.90326	-3.16282	0.0148679	0.118881	-3.47374
TUBB2A	0.44964	1.3657	8.34395	3.16205	0.0148844	0.118928	-3.52089
ESYT2	-0.364335	0.776827	7.80396	-3.15985	0.0149315	0.119137	-3.46713
RASIP1	-4.76911	0.0366737	-1.19371	-3.16006	0.0149269	0.119137	-3.72741
COPG2	-0.643652	0.64009	6.10797	-3.15903	0.014949	0.119193	-3.23627
RBM25	0.40729	1.32619	8.33649	3.1581	0.0149691	0.119269	-3.52607
LOR	4.66951	25.4486	-0.914944	3.15759	0.0149801	0.119272	-3.6377
CLIC5	-1.13051	0.456753	2.88774	-3.15635	0.0150066	0.1194	-2.72304
STT3B	-0.336486	0.791968	9.06046	-3.1516	0.0151094	0.119714	-3.60271
C20orf27	0.52189	1.43583	5.70285	3.15169	0.0151074	0.119714	-3.17912
PFDN6	0.622198	1.53922	5.24055	3.15202	0.0151003	0.119714	-3.09616
RP11-618P17.4	0.353692	1.27783	8.29891	3.15249	0.0150903	0.119714	-3.5307
TECPR2	-1.14432	0.452403	3.07172	-3.15258	0.0150883	0.119714	-2.74452
ARHGAP31	-0.992958	0.502446	3.50564	-3.153	0.0150791	0.119714	-2.79584
EXOC8	-1.08308	0.47202	3.33084	-3.15104	0.0151218	0.119728	-2.77569
UBAC1	0.772921	1.70873	4.95646	3.14988	0.0151468	0.119759	-3.04692
GAS2L3	-1.43616	0.369549	2.2604	-3.1502	0.0151398	0.119759	-2.70777
ACACA	-0.42768	0.743456	6.66247	-3.14766	0.0151952	0.120058	-3.33707
B4GALNT4	-4.81973	0.0354093	-1.17209	-3.14469	0.0152603	0.12007	-3.72736
RHBDD2	-1.03124	0.489289	3.57084	-3.14477	0.0152585	0.12007	-2.81615
CD276	-0.696199	0.617196	5.31497	-3.14492	0.0152554	0.12007	-3.1201
OXR1	-0.413924	0.750579	7.95381	-3.14517	0.0152498	0.12007	-3.50561
AHCY	-1.26631	0.415721	4.43331	-3.14566	0.015239	0.12007	-2.95715
ABCC4	-0.746215	0.596165	4.39217	-3.14584	0.015235	0.12007	-2.94955
RTN3	-0.348467	0.785418	8.38169	-3.14349	0.0152867	0.120112	-3.55243
CBWD1	-0.835738	0.560296	3.79236	-3.14396	0.0152763	0.120112	-2.85029
OR10V2P	3.62208	12.3128	-0.252056	3.14292	0.0152992	0.120127	-3.40165
UQCC2	0.416651	1.33483	7.58104	3.14175	0.0153249	0.120245	-3.4684
TCF7L2	0.619352	1.53619	6.00952	3.13737	0.0154218	0.120588	-3.25221
SPATA13	-4.37461	0.048207	0.27987	-3.13739	0.0154215	0.120588	-3.20199
BPTF	0.449279	1.36536	6.8302	3.13758	0.0154172	0.120588	-3.37593
RRAGA	-0.384673	0.765953	7.88182	-3.1376	0.0154166	0.120588	-3.50908
ZDHHC1	0.628765	1.54624	5.24164	3.13768	0.0154151	0.120588	-3.11723
SHISA4	0.570747	1.48529	5.52654	3.13605	0.0154512	0.120734	-3.17096
PWP2	-1.0557	0.481064	3.39174	-3.13466	0.0154822	0.12081	-2.80546
PARD3	-0.580251	0.668847	5.84698	-3.13508	0.0154728	0.12081	-3.22833
CFL1	0.343195	1.26856	10.6858	3.13405	0.0154958	0.120833	-3.76562
DEPDC5	-0.585346	0.666489	5.60503	-3.13214	0.0155384	0.120916	-3.19069
PSMB6	0.412541	1.33103	7.26949	3.13219	0.0155372	0.120916	-3.44364
MFHAS1	-0.632594	0.645016	5.48081	-3.13241	0.0155322	0.120916	-3.16817
ANO10	0.575652	1.49035	6.0788	3.12896	0.0156097	0.121138	-3.27601
SETBP1	0.681624	1.60394	4.47803	3.12912	0.0156061	0.121138	-2.98886
ACADS	0.784576	1.72259	4.59615	3.12924	0.0156034	0.121138	-3.01021
ENO2	-2.9275	0.131442	0.490806	-3.13013	0.0155834	0.121138	-3.12829
SMPDL3A	0.527764	1.44169	6.36888	3.12807	0.0156296	0.121209	-3.32289
HID1	-1.36311	0.388743	3.41528	-3.12692	0.0156555	0.121327	-2.81901
CD24	0.383611	1.3046	7.46841	3.12423	0.0157165	0.121468	-3.4809
ALPI	0.692272	1.61583	5.11331	3.12439	0.0157128	0.121468	-3.11292
PLPP5	-0.628864	0.646685	5.19694	-3.12459	0.0157082	0.121468	-3.12802
ATP2B1	-0.335938	0.792269	8.34254	-3.1247	0.0157057	0.121468	-3.57673
IQSEC1	-0.49902	0.707587	6.7845	-3.12031	0.0158053	0.121822	-3.39514
RAP1GDS1	-0.371721	0.77286	7.98941	-3.12034	0.0158046	0.121822	-3.54663
RHBDF1	0.602374	1.51821	5.68849	3.12092	0.0157915	0.121822	-3.22177
NR3C1	-0.4178	0.748565	7.0821	-3.12124	0.0157841	0.121822	-3.43501
TIPIN	-0.541486	0.687063	5.49085	-3.11914	0.0158319	0.121944	-3.18937
AGO1	0.391272	1.31155	7.59876	3.11602	0.0159035	0.121998	-3.50901
AGO2	-0.365141	0.776393	7.61207	-3.11635	0.0158959	0.121998	-3.51011
PRIM1	1.44062	2.71437	2.29234	3.11654	0.0158914	0.121998	-2.7477
RP11-438L7.3	0.673492	1.59493	5.56179	3.11695	0.0158821	0.121998	-3.20526
RP11-746M1.8	-4.75792	0.0369592	-1.20102	-3.11732	0.0158737	0.121998	-3.74427
RP11-585F1.8	-4.75792	0.0369592	-1.20102	-3.11732	0.0158737	0.121998	-3.74427
CALHM2	0.76893	1.70401	4.79456	3.11528	0.0159203	0.122045	-3.06685
WDR78	0.945749	1.92619	3.37133	3.1146	0.0159359	0.122082	-2.82983
FBXL5	0.381298	1.30251	7.43187	3.11234	0.0159879	0.122315	-3.4941
NOD1	-4.31291	0.0503134	-0.368414	-3.11267	0.0159804	0.122315	-3.46095
RP11-446E9.1	0.520843	1.43479	6.00924	3.1117	0.0160028	0.122346	-3.29004
CLTA	0.313722	1.24291	8.9975	3.11114	0.0160157	0.122363	-3.65797
TBC1D8	0.80149	1.7429	4.13247	3.10903	0.0160645	0.122653	-2.95546
HNRNPD	0.348381	1.27313	8.29907	3.10805	0.0160871	0.122743	-3.59733
DCBLD2	-0.767134	0.587584	4.3292	-3.10731	0.0161044	0.122792	-2.99292
SEC22A	-0.757006	0.591723	4.34473	-3.10645	0.0161244	0.122862	-2.99696
KCNAB3	-3.73295	0.0752091	0.306272	-3.1057	0.0161419	0.122913	-3.21315
RP11-38O23.4	1.71377	3.28017	2.03263	3.10477	0.0161636	0.122995	-2.76938
MPC2	0.814378	1.75854	3.9602	3.10368	0.0161889	0.123022	-2.93345
AC016716.1	-0.732033	0.602055	4.58036	-3.10371	0.0161881	0.123022	-3.04388
ATP1A1	0.253648	1.19222	11.7224	3.1027	0.0162118	0.123032	-3.89411
LTV1	-0.634275	0.644264	5.38067	-3.10305	0.0162038	0.123032	-3.19308
RRP8	-1.80254	0.286669	2.74836	-3.10004	0.0162741	0.123422	-2.78483
SPRED3	-1.22472	0.42788	2.93105	-3.09828	0.0163156	0.123572	-2.80203
GIPR	-0.989097	0.503793	3.52965	-3.09865	0.0163068	0.123572	-2.87316
PTPRN2	-0.869551	0.547317	4.76988	-3.0965	0.0163575	0.123641	-3.08932
KIF26B	1.0234	2.0327	4.13399	3.09679	0.0163507	0.123641	-2.97297
GNG12	0.456534	1.37224	6.59179	3.09724	0.01634	0.123641	-3.40169
ORC6	0.597764	1.51337	5.61265	3.09253	0.0164516	0.124269	-3.25018
SS18L1	1.64083	3.11845	1.95289	3.09126	0.0164819	0.124333	-2.79028
ARHGAP42	0.762682	1.69664	4.0417	3.09146	0.016477	0.124333	-2.96448
FMOD	2.17403	4.51282	1.28921	3.08984	0.0165157	0.124422	-2.90536
ZNF526	-1.30933	0.403508	3.17222	-3.09007	0.0165101	0.124422	-2.83804
AATF	0.579782	1.49462	5.20732	3.08916	0.0165318	0.124461	-3.18156
FLNA	0.308385	1.23832	9.13878	3.0868	0.0165883	0.124803	-3.70706
CFAP126	-3.77249	0.0731758	0.0345453	-3.08575	0.0166134	0.124909	-3.32635
GSTM4	0.477716	1.39254	6.98367	3.08429	0.0166486	0.125008	-3.47671
CTNNBL1	0.70176	1.62649	4.68363	3.08461	0.0166408	0.125008	-3.09051
TAF1B	0.756366	1.68923	4.08627	3.08026	0.0167459	0.125241	-2.98795
PATJ	1.01786	2.02491	3.20493	3.08053	0.0167394	0.125241	-2.85464
HSPE1P2	-2.49912	0.176884	0.960742	-3.08089	0.0167307	0.125241	-3.00671
RP11-305L7.5	0.72467	1.65252	7.02325	3.08114	0.0167247	0.125241	-3.48683
ARMCX1	0.98554	1.98005	3.51133	3.08188	0.0167068	0.125241	-2.89343
CEBPG	-0.66501	0.630684	4.69372	-3.08224	0.016698	0.125241	-3.09579
CYB5R1	-0.837506	0.55961	5.29353	-3.07944	0.0167659	0.125307	-3.21179
MYT1L	1.92689	3.80236	1.40091	3.07785	0.0168044	0.125513	-2.89003
FKBP1A	-0.318604	0.801845	9.116	-3.07646	0.0168382	0.125517	-3.72064
FOS	0.975408	1.9662	4.22345	3.07654	0.0168361	0.125517	-3.01755
SAMD12	0.676751	1.59854	4.73017	3.07695	0.0168263	0.125517	-3.11013
GMCL1P1	-0.890476	0.539436	3.98422	-3.07402	0.0168977	0.125878	-2.97906
RP3-393P12.1	-4.24222	0.0528404	-0.020928	-3.07236	0.0169384	0.126098	-3.3548
GALNT11	0.368723	1.29121	7.43021	3.07029	0.016989	0.126226	-3.55681
PARP2	-0.758289	0.591197	4.5255	-3.07033	0.0169882	0.126226	-3.08169
CDV3	-1.40987	0.376346	3.43584	-3.07049	0.0169842	0.126226	-2.89833
RAB28P5	-3.387	0.09559	0.0278271	-3.06671	0.0170773	0.126385	-3.34034
UHMK1	-0.526454	0.694259	5.74143	-3.06712	0.0170673	0.126385	-3.31032
TMEM147	0.777423	1.71407	5.71663	3.06735	0.0170615	0.126385	-3.30559
EEF1A1P5	-0.495382	0.709374	10.7047	-3.06751	0.0170577	0.126385	-3.86766
SLC22A23	-0.823238	0.565172	4.0774	-3.06824	0.0170396	0.126385	-3.00334
AFF3	2.09252	4.26493	1.3441	3.06829	0.0170383	0.126385	-2.91254
B3GAT3	0.55547	1.46965	6.00556	3.06598	0.0170955	0.126437	-3.35702
SSC5D	-0.493209	0.710443	6.02771	-3.0652	0.0171148	0.126498	-3.36189
MADD	-0.685425	0.621823	4.51907	-3.05913	0.0172659	0.126542	-3.09655
EWSR1	0.296971	1.22856	9.72457	3.0592	0.017264	0.126542	-3.79901
TNKS1BP1	0.540811	1.45479	6.9566	3.05931	0.0172613	0.126542	-3.51026
VPS8	-0.522125	0.696345	5.45673	-3.05947	0.0172573	0.126542	-3.27081
CBLB	-0.593723	0.662631	5.22712	-3.06064	0.0172281	0.126542	-3.2269
KMT2C	0.48637	1.40092	7.1826	3.06106	0.0172175	0.126542	-3.53841
DPP3	-0.410985	0.752109	6.98542	-3.06128	0.0172121	0.126542	-3.51132
CALM2	0.30007	1.2312	9.8677	3.06181	0.017199	0.126542	-3.80715
RSRP1	0.406006	1.32501	6.7715	3.06225	0.0171879	0.126542	-3.47977
PPP2R5B	-0.494327	0.709893	6.21851	-3.06274	0.0171758	0.126542	-3.39647
MLLT11	-1.17129	0.444026	3.55733	-3.06305	0.017168	0.126542	-2.92593
RP11-613M10.8	-1.73257	0.300916	3.19326	-3.06319	0.0171646	0.126542	-2.87639
LRRC58	-1.59992	0.329896	3.97269	-3.06344	0.0171585	0.126542	-2.99192
LRRC59	-0.381335	0.767727	7.32635	-3.05811	0.0172914	0.126565	-3.56177
CCDC43	-1.11242	0.462518	2.81666	-3.05841	0.0172838	0.126565	-2.8437
FJX1	1.69598	3.23998	2.0256	3.05749	0.0173068	0.126596	-2.82424
AOX1	0.774148	1.71018	4.69387	3.05672	0.0173261	0.126656	-3.1326
CYP8B1	-4.74611	0.0372632	-1.20216	-3.05546	0.0173577	0.126724	-3.76664
SLC6A15	-0.561319	0.677682	5.13667	-3.05552	0.0173563	0.126724	-3.21756
KLHL7	-0.670129	0.62845	5.98251	-3.05429	0.0173872	0.126776	-3.37045
C11orf88	1.94092	3.83951	2.01878	3.05466	0.0173779	0.126776	-2.82787
NAMPT	-0.349722	0.784735	8.30075	-3.05359	0.0174048	0.126822	-3.67935
TPPP3	1.57056	2.97021	2.14324	3.05255	0.0174312	0.126933	-2.82582
PCDHB16	4.55493	23.5056	-0.397346	3.05113	0.017467	0.127112	-3.50274
RBM12B	0.782716	1.72037	4.69675	3.04929	0.0175137	0.127126	-3.14386
DCTN2	0.415573	1.33383	7.15597	3.04956	0.0175068	0.127126	-3.5521
LCE1D	1.59333	3.01746	2.22278	3.04994	0.0174973	0.127126	-2.82787
ERI1	-0.895777	0.537458	4.85454	-3.05033	0.0174873	0.127126	-3.17197
PLAGL2	-0.708864	0.611802	4.56718	-3.04817	0.0175421	0.12725	-3.12118
MAP3K5	-1.25653	0.418549	2.53393	-3.04611	0.0175946	0.127468	-2.84007
TMEM39B	1.41779	2.67176	3.00362	3.04625	0.0175911	0.127468	-2.87736
APEH	0.424169	1.3418	7.24036	3.04501	0.0176227	0.12759	-3.57012
COL5A1	0.431591	1.34872	7.9872	3.04371	0.0176559	0.127749	-3.66142
ZDHHC2	-0.671108	0.628024	5.01293	-3.04291	0.0176764	0.127816	-3.21262
ITM2C	0.331158	1.25802	8.31441	3.03894	0.0177785	0.128308	-3.70279
FBXO42	-0.640545	0.641471	5.25395	-3.03898	0.0177775	0.128308	-3.26363
RREB1	-0.492417	0.710833	5.77158	-3.03939	0.017767	0.128308	-3.35652
TMEM132A	0.518884	1.43285	5.71877	3.03763	0.0178123	0.128389	-3.34982
ZFYVE21	-0.818136	0.567174	3.79627	-3.03803	0.017802	0.128389	-2.99786
FOXK2	-0.966548	0.511729	5.15895	-3.03572	0.0178619	0.128664	-3.25064
RGL3	-3.76768	0.0734202	0.327688	-3.03396	0.0179075	0.128748	-3.25408
IGSF10	4.46654	22.1087	-0.954878	3.03422	0.0179006	0.128748	-3.70027
FAM58DP	-2.08151	0.236267	1.66117	-3.03447	0.0178942	0.128748	-2.8856
RP11-480I12.2	0.368376	1.2909	8.00669	3.03336	0.017923	0.128778	-3.67911
PRKACB	-0.754594	0.592713	5.31656	-3.03073	0.0179915	0.12878	-3.28733
PRKG2	-1.50082	0.353351	3.02035	-3.0308	0.0179898	0.12878	-2.89953
DBF4	-0.850537	0.554578	3.70831	-3.03081	0.0179894	0.12878	-2.99366
AC108039.1	0.346411	1.27139	8.42311	3.03113	0.0179811	0.12878	-3.72531
TSHZ1	0.745358	1.67639	4.17659	3.03202	0.0179579	0.12878	-3.07221
PSKH1	-0.632639	0.644995	4.95507	-3.03289	0.0179353	0.12878	-3.21629
CTTNBP2NL	-0.438484	0.73791	6.543	-3.02993	0.0180124	0.128848	-3.49481
SYNRG	-0.784236	0.580659	4.09271	-3.02654	0.0181012	0.129077	-3.06488
CPA1	3.82446	14.167	-0.545937	3.02668	0.0180976	0.129077	-3.56689
COMMD3	0.517114	1.43109	6.04498	3.02709	0.0180868	0.129077	-3.42125
CAD	-0.461179	0.726392	6.4512	-3.02711	0.0180863	0.129077	-3.48528
LAMB3	-1.23142	0.425897	2.86238	-3.02757	0.0180742	0.129077	-2.88775
ARL13B	-0.935742	0.522773	3.56468	-3.02596	0.0181166	0.129105	-2.97798
RNF138	-1.17819	0.441907	2.62379	-3.02492	0.0181441	0.129139	-2.87205
ENPP5	-0.481493	0.716236	6.01385	-3.02513	0.0181385	0.129139	-3.41895
IMPAD1	-0.394966	0.760507	7.13205	-3.02352	0.0181808	0.129318	-3.58787
TLE3	-0.409533	0.752867	7.19446	-3.02196	0.0182221	0.129369	-3.59855
SLC7A2	0.811217	1.75469	4.16557	3.02208	0.018219	0.129369	-3.08431
SRP54	-0.423252	0.745742	8.41505	-3.02223	0.018215	0.129369	-3.73795
YWHAEP5	-0.751531	0.593973	4.14523	-3.0214	0.0182369	0.129393	-3.08156
SLC38A6	1.03725	2.05231	3.10649	3.02038	0.018264	0.129504	-2.92316
KDM5A	-0.407333	0.754016	7.0914	-3.01945	0.0182887	0.129599	-3.58843
ARID4B	0.423027	1.34074	6.85059	3.01838	0.018317	0.129718	-3.55657
ME1	-0.375456	0.770861	7.19319	-3.01707	0.0183521	0.129723	-3.60571
UBQLN2	0.390149	1.31053	8.21501	3.01718	0.0183491	0.129723	-3.72549
GOLPH3	-0.352398	0.783281	8.18111	-3.01781	0.0183324	0.129723	-3.72104
KCTD1	0.713869	1.6402	4.20373	3.01595	0.018382	0.129854	-3.09999
TPH1	1.36867	2.58233	2.3412	3.01539	0.0183968	0.129877	-2.8709
TMEM9	0.591739	1.50706	5.68735	3.01349	0.0184477	0.129993	-3.37985
ADORA1	-0.742823	0.597569	4.33015	-3.01354	0.0184463	0.129993	-3.12667
ATP1B3	0.36983	1.2922	7.99199	3.01372	0.0184417	0.129993	-3.70708
IER5	0.75329	1.68563	5.8905	3.01289	0.018464	0.130028	-3.41627
ATP8B2	-0.370789	0.77336	7.49135	-3.01154	0.0185002	0.130202	-3.65254
GSTM2	0.489662	1.40412	8.31229	3.01014	0.0185379	0.130386	-3.74598
PPP5C	0.449273	1.36535	6.57222	3.00936	0.0185589	0.130453	-3.52978
RP11-506H20.2	-0.943508	0.519967	3.49683	-3.00712	0.0186193	0.130473	-2.99362
STK19	1.06284	2.08904	3.2401	3.00749	0.0186093	0.130473	-2.95708
SPEF1	1.63905	3.1146	2.50647	3.00783	0.0186003	0.130473	-2.88665
MORC3	-0.59785	0.660738	4.88153	-3.00812	0.0185923	0.130473	-3.23831
RAB3B	2.09534	4.27327	1.1689	3.00842	0.0185843	0.130473	-3.0125
TOR1AIP2	-0.437294	0.738519	6.84804	-3.00478	0.0186829	0.130838	-3.57656
BLMH	-0.727356	0.60401	5.12763	-3.00375	0.0187108	0.130952	-3.29149
CDK4	0.411629	1.33019	7.13154	3.0032	0.0187258	0.130977	-3.61827
EXOC6	-1.2872	0.409747	2.72955	-3.00272	0.0187388	0.130987	-2.90825
FAM129A	-0.815782	0.5681	4.89513	-3.00218	0.0187536	0.131009	-3.24953
CORO1B	0.344208	1.26945	9.00315	3.00053	0.0187988	0.131163	-3.82525
PSMD8	0.426005	1.34351	7.37894	3.00056	0.0187979	0.131163	-3.65483
CKS1BP3	-0.956636	0.515257	3.3249	-2.99936	0.0188308	0.131306	-2.97951
DCTN3	0.570824	1.48537	6.41184	2.99741	0.0188843	0.131598	-3.52363
ATP6V1C1	-0.399195	0.758281	7.94137	-2.99474	0.0189578	0.131948	-3.73015
DCUN1D4	-0.88711	0.540696	4.07573	-2.995	0.0189506	0.131948	-3.1065
IGSF3	-0.663233	0.631462	5.68866	-2.9942	0.0189727	0.131971	-3.40861
TRIM60P19	3.50158	11.3261	-0.260755	2.99371	0.0189862	0.131984	-3.4852
GATM	-0.512379	0.701065	6.64965	-2.99292	0.019008	0.132055	-3.56572
TMOD1	-4.61177	0.0408995	-1.26832	-2.99084	0.0190657	0.132131	-3.80528
FOXS1	3.3606	10.2717	0.387941	2.99092	0.0190634	0.132131	-3.26349
RDX	-0.54118	0.687208	6.73905	-2.99103	0.0190606	0.132131	-3.5815
CKAP4	-0.368704	0.774478	7.54465	-2.99123	0.0190548	0.132131	-3.6896
JAG2	0.942729	1.92216	3.61722	2.99032	0.0190802	0.132151	-3.03529
HDAC9	-4.62615	0.0404941	-1.26086	-2.98849	0.0191313	0.132424	-3.80444
TBX2	2.6118	6.11264	0.905225	2.98702	0.0191722	0.132546	-3.1035
COL4A5	0.385152	1.306	7.63778	2.9872	0.0191672	0.132546	-3.70692
SH3GLB2	0.556355	1.47055	5.64298	2.98584	0.0192051	0.132692	-3.41281
NRAS	-0.496435	0.708856	5.82499	-2.98369	0.0192654	0.133028	-3.44817
SP1	-0.539283	0.688113	6.65404	-2.9827	0.0192931	0.133057	-3.58165
BASP1	0.348472	1.27321	8.04572	2.98302	0.0192843	0.133057	-3.75916
SLC16A10	-1.10973	0.463382	3.52886	-2.98049	0.0193555	0.133406	-3.03508
PRPF3	0.57275	1.48736	5.87023	2.97931	0.0193887	0.133473	-3.46255
BRF1	0.597232	1.51281	4.97586	2.97942	0.0193856	0.133473	-3.29819
MOGS	0.488498	1.40298	5.67285	2.97792	0.019428	0.133662	-3.42986
PCYT1B	-0.795524	0.576134	4.61438	-2.97587	0.0194862	0.133981	-3.23431
MED12	-0.520643	0.697061	5.6576	-2.97412	0.019536	0.134079	-3.43275
SDCBP	-0.373696	0.771803	7.13309	-2.97424	0.0195325	0.134079	-3.66194
PSMC3	0.381139	1.30237	7.12486	2.97479	0.0195168	0.134079	-3.65999
TGIF1P1	-0.929636	0.524991	3.72135	-2.97243	0.019584	0.134165	-3.07694
HNRNPA1P46	-1.24931	0.420648	2.7135	-2.97258	0.0195798	0.134165	-2.94575
TBX15	0.4174	1.33552	7.87311	2.97263	0.0195785	0.134165	-3.75592
EIF3A	0.298752	1.23008	9.83627	2.96984	0.0196581	0.134187	-3.94368
POLR2A	-0.387533	0.764436	7.65972	-2.97012	0.0196501	0.134187	-3.73519
GTF2E2	0.429475	1.34674	6.73523	2.97047	0.0196401	0.134187	-3.61172
KLHDC8A	1.24632	2.37236	2.4565	2.97083	0.0196299	0.134187	-2.93038
MCTP1	-0.910116	0.532142	3.73852	-2.97116	0.0196204	0.134187	-3.08157
SGK223	-1.46062	0.363336	3.2699	-2.9719	0.0195994	0.134187	-3.00919
KMT5A	-0.53606	0.689652	5.91009	-2.96888	0.0196858	0.134214	-3.48494
ETV6	-0.677051	0.625442	4.31934	-2.96898	0.0196828	0.134214	-3.18837
FYTTD1	-0.483058	0.715459	6.02603	-2.96793	0.0197131	0.134319	-3.50597
TMED2	-0.288866	0.818545	9.28314	-2.96744	0.0197273	0.134335	-3.89998
PSMA4	0.391801	1.31203	7.28035	2.96653	0.0197534	0.134352	-3.69322
RPL11	0.337864	1.26388	9.39293	2.96655	0.0197528	0.134352	-3.91084
ATG5	-1.33673	0.395916	4.75684	-2.96608	0.0197664	0.134359	-3.27564
RPS6KA6	1.1117	2.161	4.73247	2.961	0.0199133	0.134391	-3.27836
ARHGEF12	-0.374045	0.771616	7.57304	-2.96132	0.0199042	0.134391	-3.73812
PNISR	0.547758	1.46181	7.25531	2.96139	0.0199022	0.134391	-3.69761
GADD45G	0.55908	1.47333	5.35354	2.96158	0.0198965	0.134391	-3.39576
LAT2	-4.57673	0.041905	-1.2873	-2.96222	0.0198778	0.134391	-3.81983
AC018735.1	-2.48624	0.17847	0.830009	-2.96267	0.0198651	0.134391	-3.14589
BNIP3P1	-0.36194	0.778118	7.40195	-2.9628	0.0198613	0.134391	-3.71458
FAM92A1	0.590491	1.50576	5.3673	2.96298	0.0198559	0.134391	-3.39625
PPIG	0.383348	1.30437	7.27523	2.96301	0.0198551	0.134391	-3.69783
RAB6B	-0.462584	0.725685	6.06443	-2.96383	0.0198313	0.134391	-3.51849
PCBP1	0.266577	1.20295	10.2739	2.96495	0.0197989	0.134391	-3.98776
PLEKHG5	0.558137	1.47237	5.5587	2.96527	0.0197896	0.134391	-3.42802
LRRFIP1	-0.471161	0.721384	6.3207	-2.95912	0.0199682	0.134681	-3.56672
HIPK3	-0.324134	0.798778	8.63768	-2.95688	0.0200336	0.134962	-3.85794
SMG1P7	-4.57261	0.0420249	-1.2873	-2.95693	0.0200322	0.134962	-3.82174
AGA	0.405669	1.3247	6.92041	2.95505	0.0200871	0.135082	-3.66129
NCKIPSD	-0.774939	0.584413	4.49873	-2.95534	0.0200787	0.135082	-3.24198
PKNOX2	0.981543	1.97458	3.81813	2.95571	0.0200676	0.135082	-3.11654
EDEM3	-0.37625	0.770438	7.33016	-2.95353	0.0201318	0.135302	-3.71926
POLR3GL	0.465916	1.38119	5.86261	2.95302	0.0201468	0.135323	-3.50025
C1QTNF6	0.729912	1.65854	5.19698	2.95145	0.0201929	0.135552	-3.38123
NUP98	-0.496529	0.70881	7.3116	-2.95063	0.0202173	0.135635	-3.72124
NEURL1	-0.878769	0.543831	3.5066	-2.95022	0.0202294	0.135636	-3.07335
PPP1R8	-0.684303	0.622307	4.74949	-2.94953	0.0202496	0.135692	-3.29827
PACS1	-0.484802	0.714595	6.43981	-2.94785	0.0202994	0.135945	-3.60187
SMOX	-0.405387	0.755034	6.83083	-2.94608	0.0203519	0.136136	-3.66206
C12orf57	0.519373	1.43333	6.21649	2.94623	0.0203474	0.136136	-3.56953
DCK	-1.3165	0.401508	3.09771	-2.94438	0.0204025	0.136153	-3.0236
ACSL3	0.320311	1.2486	8.18843	2.94467	0.020394	0.136153	-3.83215
TMX1	-0.733518	0.601436	4.808	-2.94519	0.0203785	0.136153	-3.31588
JAK2	-0.421399	0.7467	6.75728	-2.94542	0.0203717	0.136153	-3.65246
EEF1A1P15	-0.755045	0.592528	4.81811	-2.94342	0.0204313	0.136265	-3.32042
PEX26	2.35049	5.09998	0.769072	2.94126	0.0204958	0.136615	-3.18139
RBM42	0.413605	1.33201	7.17997	2.94046	0.0205199	0.136695	-3.71899
VASH1	-2.86112	0.137632	0.299099	-2.93918	0.0205583	0.13687	-3.3292
DMWD	0.561372	1.47567	5.21206	2.93598	0.0206545	0.13743	-3.40682
MTDH	-0.364003	0.777006	8.64497	-2.93531	0.020675	0.137486	-3.89127
SAMD1	-0.589902	0.664388	5.30276	-2.93447	0.0207003	0.137573	-3.4263
NXF1	0.361277	1.28456	7.59028	2.93246	0.0207612	0.137897	-3.78371
ISL2	-4.55352	0.0425848	-1.29608	-2.92897	0.0208674	0.137956	-3.83378
WDR45B	-0.485417	0.71429	5.6098	-2.92916	0.0208615	0.137956	-3.49076
RP11-72K17.1	-4.57121	0.0420657	-1.29093	-2.92948	0.020852	0.137956	-3.83249
RAB1A	-0.315543	0.803548	9.06108	-2.92985	0.0208406	0.137956	-3.93737
CCDC6	-1.4418	0.368109	5.03489	-2.92996	0.0208374	0.137956	-3.38177
PGM1	-0.309999	0.806642	8.84707	-2.93048	0.0208216	0.137956	-3.9172
NR2F6	0.501648	1.41583	7.04382	2.93109	0.0208029	0.137956	-3.71447
CELA2B	3.57179	11.891	-0.10124	2.9316	0.0207874	0.137956	-3.4665
TEAD1	-0.653807	0.635601	5.39619	-2.92781	0.0209029	0.13811	-3.4535
SAP30L	0.564441	1.47881	5.1834	2.92701	0.0209274	0.138191	-3.41458
TECR	0.340082	1.26583	8.02218	2.92655	0.0209415	0.138204	-3.84185
AKT1S1	0.661628	1.58187	5.08571	2.92469	0.0209986	0.1385	-3.39929
PAQR3	-1.20583	0.433519	3.58495	-2.92283	0.0210559	0.138797	-3.12365
ARL15	-0.675709	0.626024	4.61719	-2.92177	0.0210885	0.138932	-3.31317
AP3M1	-0.40913	0.753077	6.51573	-2.92126	0.0211043	0.138955	-3.65318
MMP15	1.61965	3.07301	1.73541	2.92086	0.0211167	0.138956	-2.9998
SURF4	-0.359962	0.779185	7.87855	-2.91789	0.0212085	0.138996	-3.83912
RPS9	0.351193	1.27562	8.60877	2.9179	0.0212083	0.138996	-3.91419
USP39	-0.412222	0.751465	7.01738	-2.91844	0.0211915	0.138996	-3.72984
CITED2	0.284569	1.21805	9.64342	2.91869	0.0211837	0.138996	-4.0049
TMEM129	0.941319	1.92028	3.36111	2.91906	0.0211724	0.138996	-3.09409
USP42	0.735848	1.66538	4.03925	2.91944	0.0211604	0.138996	-3.20701
RAB5A	-0.389891	0.763187	6.90999	-2.91952	0.0211579	0.138996	-3.71314
RAB33A	-3.96855	0.0638774	-0.735674	-2.91711	0.0212329	0.139075	-3.68089
DYRK3	-1.46808	0.361463	1.92921	-2.9166	0.0212486	0.139097	-2.99132
LMCD1	0.649935	1.5691	4.8618	2.91563	0.021279	0.139216	-3.36933
GCNT1	-2.80177	0.143411	1.89949	-2.91491	0.0213015	0.139283	-2.99462
STK35	-1.26354	0.416519	3.45925	-2.91351	0.0213452	0.139327	-3.11666
KRT8P5	0.819114	1.76432	5.08631	2.91373	0.0213382	0.139327	-3.41548
KIZ	0.534171	1.44811	5.95056	2.91396	0.0213311	0.139327	-3.57348
TTC12	-3.56444	0.0845272	0.221307	-2.91248	0.0213772	0.139456	-3.37271
GTF3C2	-0.427732	0.74343	6.92041	-2.91203	0.0213913	0.139468	-3.72588
RAPH1	-0.544692	0.685538	5.29533	-2.90892	0.0214892	0.139704	-3.46256
NOL10	-1.06822	0.476908	3.73429	-2.90892	0.0214889	0.139704	-3.16782
DNPEP	0.517314	1.43129	5.98684	2.90903	0.0214856	0.139704	-3.58698
GCOM2	-0.47038	0.721775	5.98971	-2.90941	0.0214735	0.139704	-3.5869
TTC3	-0.644172	0.63986	4.64159	-2.91046	0.0214405	0.139704	-3.3343
MYLIP	-0.791999	0.577543	4.44536	-2.90813	0.0215139	0.139785	-3.29978
MRPS25	-0.718419	0.607763	4.89379	-2.90526	0.0216046	0.140294	-3.39064
NUP188	-0.474585	0.719674	6.29255	-2.90343	0.0216626	0.140509	-3.64547
CMPK2	-3.13251	0.11403	0.28467	-2.90368	0.0216548	0.140509	-3.35853
CH17-472G23.4	1.02882	2.04036	3.50838	2.90291	0.0216791	0.140536	-3.13892
UFD1L	0.43505	1.35196	6.07102	2.89929	0.0217944	0.141122	-3.61577
WARS2	-1.65825	0.316824	1.68826	-2.89933	0.0217932	0.141122	-3.02817
ABTB2	-0.933737	0.5235	4.25301	-2.89836	0.0218243	0.141235	-3.27702
C2orf68	1.00165	2.00228	3.14793	2.89754	0.0218503	0.141242	-3.09311
IFT172	-0.471877	0.721026	6.22825	-2.89774	0.0218439	0.141242	-3.64382
CDK5RAP1	0.458645	1.37425	5.84139	2.89523	0.0219244	0.141479	-3.58242
ELOVL1	0.401636	1.321	7.45278	2.89549	0.0219164	0.141479	-3.8225
C12orf66	-0.974315	0.508982	3.67163	-2.89554	0.0219145	0.141479	-3.17586
IER5L	0.611518	1.52787	5.79162	2.89191	0.0220315	0.141526	-3.57864
NCKAP5L	-1.23343	0.425305	3.20054	-2.89194	0.0220305	0.141526	-3.10786
SLC51B	4.24162	18.9171	-0.507811	2.89195	0.0220302	0.141526	-3.62107
AC090804.1	0.621305	1.53827	7.46916	2.89274	0.0220048	0.141526	-3.82869
HMGA1	-0.583757	0.667224	6.53704	-2.89329	0.021987	0.141526	-3.69827
CLUH	-0.656043	0.634616	5.65974	-2.89358	0.0219775	0.141526	-3.55249
ACTBL2	0.528238	1.44217	6.17772	2.89405	0.0219625	0.141526	-3.64112
IMPDH2	0.373148	1.29518	7.65194	2.89432	0.0219537	0.141526	-3.84858
ETNK1	-1.34585	0.393423	4.46017	-2.89118	0.022055	0.141597	-3.32711
MAP3K2	-0.922037	0.527763	5.30777	-2.8907	0.0220707	0.141617	-3.49177
UBR7	-0.644714	0.63962	5.15712	-2.89029	0.0220839	0.141622	-3.4636
NOVA1	0.787517	1.7261	4.18237	2.88811	0.0221547	0.141835	-3.27831
ARIH1	-0.351625	0.783701	8.14139	-2.88842	0.0221448	0.141835	-3.91223
FAM188B	1.23167	2.34838	3.13361	2.88873	0.0221346	0.141835	-3.10308
TMEM203	0.608398	1.52457	4.62683	2.8874	0.0221779	0.141903	-3.36492
THOP1	0.444417	1.36076	6.43898	2.8828	0.0223279	0.141982	-3.6991
GBP6	-0.869593	0.547301	4.09702	-2.88283	0.022327	0.141982	-3.26975
ZDHHC16	0.516459	1.43044	5.99697	2.88305	0.0223198	0.141982	-3.62744
DGAT1	0.789111	1.72801	4.11353	2.88323	0.022314	0.141982	-3.27226
KLF4	-0.460419	0.726775	6.86927	-2.88323	0.0223139	0.141982	-3.76191
C10orf88	0.914966	1.88552	3.20693	2.88462	0.0222684	0.141982	-3.11868
FAM45A	-0.718143	0.607879	4.29084	-2.88505	0.0222544	0.141982	-3.30332
ZNHIT1	0.532486	1.44642	5.87779	2.88537	0.022244	0.141982	-3.60352
HES1	0.491575	1.40598	6.35728	2.88573	0.0222323	0.141982	-3.68219
HIST2H2AA3	0.798968	1.73986	4.71955	2.88602	0.0222226	0.141982	-3.38491
GLI3	-0.852412	0.553858	3.87847	-2.88618	0.0222177	0.141982	-3.22499
TSPAN4	0.484024	1.39864	6.83791	2.88236	0.0223425	0.141995	-3.75877
DGKZ	-0.667883	0.629429	4.9226	-2.88147	0.0223717	0.142101	-3.43106
LRP12	-0.528992	0.693039	5.54124	-2.88083	0.0223928	0.142156	-3.54979
GPX1	0.350467	1.27497	7.76737	2.87929	0.0224434	0.142158	-3.88485
IGBP1P3	4.95285	30.9711	1.29119	2.87935	0.0224415	0.142158	-3.10849
WDR77	-0.632008	0.645278	4.72977	-2.87945	0.0224382	0.142158	-3.39646
EMC10	-1.15095	0.450327	3.53851	-2.87948	0.022437	0.142158	-3.17621
NFYC	0.516117	1.4301	5.27606	2.87503	0.0225842	0.142256	-3.50888
BORCS7-ASMT	0.819445	1.76473	4.59519	2.87537	0.022573	0.142256	-3.37621
SPIDR	-0.55946	0.678556	5.17285	-2.87572	0.0225614	0.142256	-3.48804
SGPL1	-0.410308	0.752463	7.69529	-2.8758	0.0225587	0.142256	-3.88168
DOC2GP	1.12297	2.17795	3.00126	2.87634	0.0225408	0.142256	-3.10249
METTL3	0.538908	1.45287	5.32211	2.87654	0.0225343	0.142256	-3.51535
UGT1A6	-0.773671	0.584927	3.76482	-2.87683	0.0225246	0.142256	-3.21808
TAOK2	0.39479	1.31475	6.78974	2.87739	0.0225059	0.142256	-3.75929
CADM1	0.313853	1.24302	8.37336	2.87761	0.0224989	0.142256	-3.95245
MTHFD1L	-0.358873	0.779773	7.60207	-2.87816	0.0224806	0.142256	-3.86708
ARL4A	-0.881891	0.542656	3.5277	-2.87093	0.0227206	0.142956	-3.1863
FGD1	0.520105	1.43406	5.69291	2.87115	0.0227134	0.142956	-3.59183
RP11-347C18.1	-0.340784	0.789612	8.10987	-2.86998	0.0227524	0.143076	-3.93678
KBTBD2	-0.461915	0.726022	6.23978	-2.86793	0.022821	0.143428	-3.69024
AGGF1	-0.633739	0.644504	4.68551	-2.86684	0.0228577	0.1435	-3.4063
COX5BP1	0.415546	1.3338	7.52906	2.86718	0.0228462	0.1435	-3.87466
UBE2SP2	0.392056	1.31226	6.65579	2.86435	0.0229412	0.143785	-3.75931
CTPS1	0.326028	1.25356	8.04032	2.86452	0.0229357	0.143785	-3.93762
ZNF397	-1.24857	0.420866	2.95215	-2.86493	0.0229216	0.143785	-3.11164
AC087499.5	-1.2563	0.418616	2.24912	-2.86314	0.0229821	0.143962	-3.05476
SRSF2	0.300324	1.23142	8.85213	2.86205	0.0230189	0.144113	-4.02139
TMEM87B	-0.574983	0.671294	4.97335	-2.86158	0.0230348	0.144133	-3.47015
PARP12	-0.742299	0.597786	4.07532	-2.86059	0.0230683	0.144263	-3.29743
SHOC2	-0.330876	0.795053	7.89371	-2.85914	0.0231175	0.144491	-3.92962
ZNF610	-2.43218	0.185286	1.08034	-2.8586	0.0231359	0.144526	-3.17265
ID2	-0.578154	0.66982	4.99322	-2.85787	0.0231607	0.144601	-3.47947
USP4	-0.362742	0.777685	7.04597	-2.85712	0.0231863	0.144681	-3.82607
HNRNPA1P48	0.597279	1.51286	7.60752	2.85602	0.023224	0.144837	-3.9012
VPS29	0.397793	1.31749	7.13265	2.85539	0.0232453	0.14489	-3.84068
PPFIBP1	-0.418285	0.748314	7.19836	-2.8542	0.0232863	0.144986	-3.85136
RTN4IP1	-1.09691	0.467517	2.84542	-2.85442	0.0232786	0.144986	-3.11299
NEO1	0.328385	1.25561	8.93673	2.85243	0.0233467	0.145203	-4.04367
ESCO1	-0.595909	0.661627	4.73235	-2.85264	0.0233398	0.145203	-3.43604
GSTA5	0.616575	1.53323	4.54756	2.84932	0.0234538	0.14555	-3.40477
ERMP1	-1.08972	0.469854	3.15067	-2.8495	0.0234478	0.14555	-3.15841
FAM234A	0.57153	1.4861	5.21378	2.8497	0.0234408	0.14555	-3.53423
AC013470.6	0.426819	1.34427	6.08853	2.85011	0.0234268	0.14555	-3.6921
ADIPOR2	-0.608209	0.656011	5.67993	-2.84738	0.0235211	0.145887	-3.6248
CLIC1P1	0.42682	1.34427	6.36535	2.84393	0.0236408	0.14655	-3.74607
LSM14B	-0.442496	0.73586	6.32592	-2.84208	0.023705	0.146787	-3.74261
KIAA2026	-0.530885	0.69213	5.82709	-2.84227	0.0236986	0.146787	-3.65877
RP3-352A20.1	-3.53496	0.0862722	0.318972	-2.84014	0.0237727	0.146885	-3.39279
SNX18P3	-1.56848	0.337163	1.90514	-2.84045	0.023762	0.146885	-3.08013
SGPP1	0.486237	1.40079	6.39441	2.84079	0.0237503	0.146885	-3.75528
CAPN2	0.398991	1.31859	6.90792	2.84094	0.023745	0.146885	-3.83104
FKBP2	0.451885	1.36783	6.42534	2.83966	0.0237897	0.14691	-3.76169
MTHFD2	-3.67178	0.0784663	-0.221693	-2.83787	0.0238523	0.147217	-3.56037
PYGB	-0.682495	0.623087	5.06657	-2.83333	0.0240125	0.147723	-3.52979
FNTB	-1.114	0.462011	2.8086	-2.83355	0.0240045	0.147723	-3.13633
TRA2A	0.466294	1.38156	6.81473	2.8339	0.0239923	0.147723	-3.82831
CHURC1-FNTB	-0.539653	0.687936	5.17145	-2.83406	0.0239866	0.147723	-3.54916
DNMT3A	0.640924	1.55933	4.73137	2.83442	0.0239739	0.147723	-3.46243
TIMP3	-3.86823	0.0684771	-0.787034	-2.83453	0.0239702	0.147723	-3.73444
ARHGAP22	0.479782	1.39453	6.04549	2.8329	0.0240274	0.147735	-3.71061
BTRC	0.490975	1.40539	5.59916	2.83153	0.0240761	0.147954	-3.63367
LRP5	-0.302593	0.810794	8.83661	-2.83116	0.0240892	0.147954	-4.06687
CLDN12	-0.616626	0.652195	4.53098	-2.83055	0.024111	0.148008	-3.42881
ABL2	-0.570437	0.673413	5.59425	-2.82989	0.0241343	0.148071	-3.6352
ATF3	-0.57595	0.670845	4.79165	-2.82926	0.0241569	0.148129	-3.48184
LFNG	0.779997	1.71713	4.30221	2.82785	0.024207	0.148196	-3.3878
NEBL	-4.43284	0.0463003	-1.35633	-2.82811	0.0241979	0.148196	-3.8832
SLC4A2	0.370405	1.29272	7.30577	2.82849	0.0241841	0.148196	-3.90456
HNRNPA1	0.390759	1.31108	7.82095	2.82747	0.0242205	0.148199	-3.9693
RPL7AP66	0.37261	1.29469	7.31774	2.82668	0.0242487	0.148291	-3.90886
MVB12B	-0.930127	0.524812	3.22618	-2.82474	0.0243183	0.148317	-3.2029
USP12	-0.51249	0.701011	5.92282	-2.82479	0.0243165	0.148317	-3.70171
GHITM	-0.38204	0.767352	7.28841	-2.82515	0.0243035	0.148317	-3.90731
UNC45A	0.821325	1.76703	5.65405	2.82522	0.0243009	0.148317	-3.65303
AC104651.2	-0.740442	0.598556	3.94188	-2.82609	0.02427	0.148317	-3.32159
CRKL	0.372439	1.29454	6.8156	2.82335	0.0243679	0.14838	-3.84431
GPC4	0.416187	1.3344	6.95996	2.82345	0.0243644	0.14838	-3.86479
DPEP3	-4.42922	0.0464165	-1.35633	-2.82367	0.0243565	0.14838	-3.88483
KLHL21	-0.460388	0.726791	6.80896	-2.82014	0.0244836	0.148526	-3.84819
RALGPS1	-1.46663	0.361827	1.83525	-2.82038	0.0244748	0.148526	-3.1058
RPS6KA3	-0.5523	0.681932	6.31667	-2.82053	0.0244696	0.148526	-3.77344
PTRHD1	0.970306	1.95926	2.97437	2.82056	0.0244683	0.148526	-3.17361
LZIC	1.01531	2.02134	3.34926	2.8207	0.0244633	0.148526	-3.22719
44445	-1.20821	0.432804	2.83116	-2.82088	0.0244568	0.148526	-3.15562
HOOK2	1.28219	2.43209	2.35768	2.82141	0.0244378	0.148526	-3.11175
BMPR2	-0.346649	0.786409	7.30839	-2.81758	0.024576	0.148848	-3.92138
EN1	1.11428	2.16488	2.64457	2.81763	0.0245744	0.148848	-3.13976
RP11-390K5.1	-4.69548	0.0385941	1.40851	-2.81764	0.024574	0.148848	-3.15044
SHC2	2.90074	7.46809	1.01595	2.81463	0.0246831	0.149417	-3.22755
GPC3	4.67987	25.632	-1.65844	2.81401	0.0247057	0.149474	-3.94591
PNPLA8	-0.434058	0.740177	6.78115	-2.81307	0.0247401	0.149602	-3.85478
UGDH	-0.344717	0.787463	8.29648	-2.81044	0.0248363	0.150104	-4.04646
SAMD4B	-0.470213	0.721858	7.57784	-2.80824	0.024917	0.150431	-3.96978
DUSP27	1.35833	2.56387	2.00506	2.80857	0.024905	0.150431	-3.11599
ZC3H11A	0.324088	1.25187	7.93845	2.80776	0.0249347	0.150457	-4.01238
ZNF638	0.434019	1.35099	6.80274	2.80653	0.02498	0.15065	-3.86778
IPO8	-0.624513	0.648639	5.14119	-2.80615	0.0249938	0.150654	-3.58448
TUFT1	0.381671	1.30285	6.83015	2.80449	0.0250552	0.150863	-3.87481
LMAN1	-0.699671	0.615712	6.64735	-2.80471	0.0250469	0.150863	-3.84769
ADCY3	0.471379	1.38643	5.71361	2.80399	0.0250735	0.150894	-3.69553
RPS21	0.334733	1.26114	9.46393	2.8009	0.0251883	0.151344	-4.16851
GRB10	1.40396	2.64627	2.137	2.80109	0.0251813	0.151344	-3.12683
ATXN2L	-0.318116	0.802117	7.93438	-2.80149	0.0251663	0.151344	-4.02143
TREML2	0.413365	1.33179	6.84671	2.80045	0.025205	0.151364	-3.88328
PPARA	1.86917	3.65322	1.3191	2.80009	0.0252184	0.151364	-3.18229
POLR1D	0.361739	1.28497	7.41411	2.79904	0.0252575	0.151518	-3.96316
CMTM7	0.593897	1.50932	4.6722	2.79797	0.0252976	0.151679	-3.50405
PSMB5	0.3476	1.27244	7.69542	2.79753	0.0253139	0.151696	-4.00006
SPOP	-0.330736	0.795131	8.30844	-2.79672	0.0253441	0.151797	-4.06849
HPCAL1	-0.530397	0.692364	5.6024	-2.79587	0.0253759	0.151907	-3.68727
BCL7A	0.709501	1.63524	4.42999	2.79219	0.0255143	0.152574	-3.46442
RANBP6	-0.535462	0.689938	5.2355	-2.79239	0.0255065	0.152574	-3.62308
NAA25	-0.406386	0.754511	6.27655	-2.79128	0.0255486	0.152699	-3.81088
GABARAPL2	0.35472	1.27874	8.06821	2.79003	0.0255956	0.152819	-4.05346
DDHD1	0.487566	1.40208	5.4036	2.79014	0.0255914	0.152819	-3.6586
PARM1	1.31882	2.49462	2.30891	2.78955	0.0256138	0.152847	-3.14855
CHPF2	0.316847	1.24561	8.2915	2.78731	0.0256986	0.153031	-4.08102
NME2	0.369153	1.29159	8.55411	2.78757	0.0256888	0.153031	-4.10665
CCS	0.676412	1.59816	5.41525	2.78793	0.0256753	0.153031	-3.6641
FAM118B	-0.985448	0.505069	4.5187	-2.78794	0.0256747	0.153031	-3.48824
UBXN7	-0.554477	0.680904	5.51443	-2.78686	0.0257157	0.153052	-3.68424
B4GALT1	-0.333988	0.79334	7.62632	-2.78439	0.0258097	0.153531	-4.01175
THSD4	-3.4934	0.0887935	-0.107354	-2.78106	0.0259371	0.154127	-3.5596
LRIG3	1.32067	2.49782	3.37894	2.78121	0.0259314	0.154127	-3.28633
PHC1P1	-1.30506	0.404706	2.90532	-2.7805	0.0259585	0.154174	-3.21816
TBPL1	-0.650814	0.636921	5.73658	-2.77967	0.0259904	0.154201	-3.73596
BRSK1	-1.95227	0.25841	1.09591	-2.77975	0.0259876	0.154201	-3.24297
RPS17	0.343136	1.26851	9.11138	2.7792	0.0260084	0.154228	-4.17061
PDE2A	-0.621285	0.650092	5.706	-2.77726	0.0260833	0.154349	-3.73396
FAM91A1	-0.384938	0.765812	7.43136	-2.77748	0.0260749	0.154349	-3.998
MCC	-1.32442	0.39931	2.65186	-2.77788	0.0260592	0.154349	-3.19209
EML3	0.601809	1.51762	6.2523	2.77816	0.0260483	0.154349	-3.82669
POR	-0.373537	0.771888	7.05403	-2.7745	0.0261899	0.154899	-3.95177
HLA-F	0.448685	1.3648	8.01889	2.77381	0.0262166	0.154976	-4.07269
PGLS	0.389585	1.31002	6.74887	2.77225	0.0262771	0.155011	-3.91149
MAP4K4	0.270909	1.20657	9.34425	2.77235	0.0262732	0.155011	-4.20154
INTS6	0.620489	1.5374	6.24134	2.77253	0.026266	0.155011	-3.83338
CENPV	0.97847	1.97037	3.08005	2.77285	0.0262538	0.155011	-3.25209
AMFR	-0.345168	0.787216	8.48695	-2.76746	0.0264638	0.155706	-4.1307
MTCO1P21	2.15559	4.45551	1.05523	2.76764	0.0264567	0.155706	-3.26253
APBB2	-0.404609	0.755441	6.30732	-2.76769	0.0264549	0.155706	-3.8512
KCTD17	0.45872	1.37432	6.09296	2.76773	0.0264534	0.155706	-3.81607
TMX3	-0.606348	0.656857	5.821	-2.76842	0.0264262	0.155706	-3.76783
TMEM205	0.756409	1.68928	5.45794	2.76708	0.0264786	0.155713	-3.70313
BTBD9	-0.577355	0.670191	4.8479	-2.76667	0.0264948	0.155727	-3.58465
RP11-315D16.2	2.03304	4.09266	1.16781	2.76623	0.0265118	0.155747	-3.24203
AC097533.1	-1.97692	0.254031	2.18646	-2.76569	0.0265331	0.155791	-3.17175
TSPYL1	-0.425092	0.744791	6.44745	-2.76405	0.0265975	0.156088	-3.87861
RND3	0.399571	1.31912	6.32067	2.76277	0.026648	0.156142	-3.86072
HADHA	0.396896	1.31667	6.89373	2.763	0.0266389	0.156142	-3.94643
NOA1	0.649368	1.56848	4.25498	2.76308	0.0266359	0.156142	-3.47188
TMEM120B	-1.38405	0.38314	2.07949	-2.76233	0.0266653	0.156163	-3.17216
MYO9B	-0.336556	0.791929	7.3221	-2.76114	0.0267124	0.156277	-4.00845
ELL2	-0.461433	0.726265	6.13755	-2.76146	0.0266997	0.156277	-3.83286
RPS4XP3	-0.987823	0.504238	5.68295	-2.76015	0.0267516	0.156426	-3.7552
ULK2	0.406648	1.3256	6.49526	2.75954	0.0267756	0.156486	-3.89277
SLC10A6	0.609496	1.52573	4.42029	2.75837	0.0268222	0.156596	-3.51151
ENY2	0.398227	1.31789	6.5774	2.75845	0.0268191	0.156596	-3.90681
SERPINB10	-0.612308	0.654149	4.41894	-2.75796	0.0268383	0.15661	-3.51183
PTPMT1	-1.10859	0.463746	2.72555	-2.75673	0.0268871	0.156814	-3.22776
PRMT1	0.403747	1.32294	6.46785	2.75544	0.0269386	0.157033	-3.89471
DPYSL3	-0.371892	0.772768	7.01867	-2.75178	0.0270849	0.157079	-3.98112
CCDC88B	2.24463	4.73915	0.964244	2.75197	0.0270773	0.157079	-3.2959
RBM5	0.372318	1.29443	8.11723	2.75235	0.0270622	0.157079	-4.11584
MAPK1	-0.270887	0.82881	9.58997	-2.75262	0.0270511	0.157079	-4.25288
PWWP2A	0.638419	1.55662	4.43574	2.75284	0.0270427	0.157079	-3.5226
ID4	1.27881	2.42638	2.14005	2.753	0.027036	0.157079	-3.18534
PSPH	-0.763269	0.58916	3.88158	-2.7536	0.0270122	0.157079	-3.4133
RABGAP1L	-0.538042	0.688705	5.36459	-2.75411	0.0269917	0.157079	-3.70457
RPL30P14	-1.12721	0.457801	3.03072	-2.75441	0.0269799	0.157079	-3.26999
HIST4H4	3.35788	10.2523	0.988842	2.75441	0.0269796	0.157079	-3.28848
MTCYBP4	2.572	5.94632	0.394611	2.74789	0.0272412	0.157904	-3.43882
RPL19P14	-1.08519	0.471329	2.85799	-2.74643	0.0273005	0.158167	-3.25748
RPS11	0.455385	1.37115	9.39288	2.74523	0.027349	0.158367	-4.24708
IFT22	0.568917	1.48341	4.74913	2.73919	0.0275946	0.158897	-3.60516
RELA	-0.341738	0.78909	7.25446	-2.73924	0.0275924	0.158897	-4.03252
SLC30A9	-0.341191	0.789389	7.29529	-2.73952	0.0275812	0.158897	-4.0376
HARBI1	-3.43968	0.0921625	-0.135822	-2.74011	0.0275569	0.158897	-3.59311
MBNL2	-0.303619	0.810218	8.58985	-2.74023	0.0275519	0.158897	-4.18195
PFN1P10	1.00069	2.00095	2.98088	2.7405	0.027541	0.158897	-3.28179
ZNF579	0.882617	1.84372	3.56601	2.74096	0.0275224	0.158897	-3.3738
COPS4	0.379362	1.30077	6.57386	2.74142	0.0275036	0.158897	-3.93189
OTUB1	0.306925	1.23707	8.02536	2.74192	0.0274833	0.158897	-4.12176
RP11-1036E20.7	-4.33502	0.0495485	-1.40293	-2.7422	0.027472	0.158897	-3.92394
RNF144B	-4.33502	0.0495485	-1.40293	-2.7422	0.027472	0.158897	-3.92394
RGMA	0.960011	1.94532	3.07008	2.73782	0.0276509	0.158978	-3.29804
ABCB7	-0.689099	0.620241	4.30702	-2.73792	0.0276464	0.158978	-3.51851
CNNM1	0.453414	1.36928	5.57787	2.73795	0.0276452	0.158978	-3.76887
SIRT3	0.882688	1.84381	3.22815	2.73691	0.0276879	0.15903	-3.32319
SNRPE	0.601903	1.51772	6.15675	2.737	0.0276844	0.15903	-3.87273
HOXB13	0.928601	1.90343	3.35342	2.7349	0.0277705	0.159424	-3.34609
SLC35B1	-0.559025	0.678761	5.26322	-2.7336	0.027824	0.15965	-3.71549
ZNF608	-0.70624	0.612915	4.30022	-2.73152	0.0279102	0.160064	-3.5264
JMY	-0.42719	0.743709	6.07033	-2.73007	0.0279699	0.160244	-3.8687
CDC42SE2	-1.42387	0.372711	3.22982	-2.7303	0.0279606	0.160244	-3.33251
DLGAP4	0.308386	1.23832	7.93217	2.72971	0.0279849	0.160249	-4.12998
NOC2L	-0.686208	0.621485	4.63462	-2.72774	0.028067	0.160314	-3.59902
RP11-603B24.2	-3.83891	0.0698834	-0.805919	-2.72804	0.0280542	0.160314	-3.78923
ANKRD54	-0.840894	0.558297	3.5797	-2.72808	0.0280526	0.160314	-3.39424
C3orf58	-0.631468	0.645519	6.89475	-2.72829	0.0280439	0.160314	-3.99892
ABCB1	-0.47079	0.721569	6.00655	-2.72854	0.0280337	0.160314	-3.86003
DHRS9	-1.1286	0.457361	4.4066	-2.72575	0.0281497	0.160625	-3.55608
WDR48	-0.389275	0.763513	6.32338	-2.72575	0.0281496	0.160625	-3.91674
CTD-2643K12.1	0.56402	1.47838	5.27558	2.72486	0.0281869	0.160756	-3.73086
GLUL	-0.357416	0.780561	6.86623	-2.72395	0.028225	0.160811	-4.00138
MSH6	0.705194	1.63036	4.36882	2.72409	0.0282191	0.160811	-3.55097
ARHGAP32	0.669793	1.59084	4.30234	2.72164	0.0283216	0.160877	-3.54109
TAB2	-0.337016	0.791677	8.18915	-2.72169	0.0283199	0.160877	-4.17004
RCHY1	0.383329	1.30435	6.58376	2.7219	0.0283108	0.160877	-3.96275
SAMD8	-0.61484	0.653002	5.12778	-2.72245	0.0282878	0.160877	-3.7054
CCDC82	0.917136	1.88836	3.15349	2.72271	0.0282771	0.160877	-3.33106
UNC13B	-1.32316	0.399658	3.11346	-2.72311	0.0282599	0.160877	-3.32443
FAT4	2.2346	4.70633	0.94841	2.72116	0.0283421	0.160913	-3.32718
OTUD1	-1.59453	0.331129	2.63318	-2.71992	0.0283939	0.161126	-3.26549
GKAP1	0.655471	1.57513	4.55235	2.71899	0.0284333	0.161269	-3.59525
[truncated: 714 more rows]
