# Supplementary material for: Differential chondrogenic differentiation between iPSC derived from healthy and OA cartilage is associated with changes in epigenetic regulation and metabolic transcriptomic signatures
Source: eLife. 2023 Jan 30;12:e83138. doi: 10.7554/eLife.83138 (PMC9886280; doi:10.7554/eLife.83138)
Supplement: Figure 4—source data 2. [file elife-83138-fig4-data2.xlsx]

## Sheet: KEGG_D21_Results-GeneCodis4
description	annotation_id	genes_found	input_size	term_genes	genes_universe	relative_enrichment	pval	pval_adj	genes
Metabolic pathways	hsa01100	30	409	561	61686	8.06532	3.15435e-18	7.16037e-16	ENPP4,B4GALNT4,MGAT4A,ALDOC,ENO2,GPAM,ELOVL7,CPOX,CYP8B1,GALNT6,PLCE1,MGAT3,B3GALNT1,ACSBG1,GCNT1,DPYD,CMPK2,AGL,ALDH1A1,NOS2,AMY2B,PSAT1,PDE4B,MTHFD2,GDA,CYP26B1,CKMT1B,SHPK,FKTN,DHRS3
Epigenetic regulation	hsa05168	19	409	124	61686	10.9467	2.16037e-13	7.16037e-11	JDP2, RUVBL1, SS18L2, MYBBP1A,RUVBL2,TDG, ASF1B,EYA3,EYA4,GSE1,HDAC10,HDAC11,USP12, C17orf49,GATAD2B,L3MBTL2,MUM1,UIMC1,WDR5,ATF2,CHEK1
Chormatin organization	hsa04974	21	409	129	61686	26.0037	4.30256e-08	7.16037e-07	PRMT1,UBE2E1,VRK1,PCGF1,PCGF5,EXOSC6,ANP32B,APEX1,ARID2,ARID4B,ARRB1,ATRX,BAZ1A,BAZ2B,BCOR,BPTF,BRD4,BRD8,BRDT,BRWD1,CBX1,CBX5,CREBBP,DNMT3A,DPF2,EHMT2,ELP3,EP300,EPC2,ERCC6,EXOSC1,EXOSC7,GADD45A,GADD45G,GTF3C4,H1FX,H2AFY2,HDAC3,HDAC4,HDAC8
MAPK signaling pathway	hsa04010	9	409	197	61686	6.89032	7.75699e-06	0.000293473	FGFR2,RPS6KA2,MEF2C,CACNA1A,IRAK4,MAPK12,PTPN5,CSF1R,ARRB1
Autophagy pathway	hsa04722	6	409	84	61686	10.773	2.15231e-05	0.000697964	RPS6KA2,BEX3,IRAK4,MAPK12,BCL2,SHC2
Estrogen signaling pathway	hsa04915	5	409	76	61686	9.92247	0.000156959	0.00356296	OPRM1,KRT16,BCL2,KRT15,SHC2
Calcium signaling pathway	hsa04020	6	409	148	61686	6.11439	0.000489025	0.00652992	FGFR2,PTK2B,CACNA1A,PLCE1,NOS2,P2RX2
Rap1 signaling pathway	hsa04015	6	409	150	61686	6.03286	0.000524941	0.00662009	FGFR2,PLCE1,MAPK12,PARD6B,CSF1R,SIPA1
FoxO signaling pathway	hsa04068	5	409	97	61686	7.7743	0.000488759	0.00693426	PRKAA2,FOXO6,HOMER2,CCNB1,MAPK12
HIF-1 signaling pathway	hsa04066	4	409	74	61686	8.15251	0.00151986	0.0107815	ALDOC,ENO2,BCL2,NOS2
Retinol metabolism	hsa00830	3	409	26	61686	17.4025	0.000671669	0.00726042	ALDH1A1,CYP26B1,DHRS3
Taste transduction	hsa04742	3	409	30	61686	15.0822	0.00102844	0.0101503	CACNA1A,SCN2A,P2RX2
MicroRNAs in cancer	hsa05206	5	409	120	61686	6.28423	0.00127692	0.0103522	TIMP3,TNC,SLC7A1,BCL2,ZFPM2
Cholesterol metabolism	hsa04979	3	409	32	61686	14.1395	0.00124416	0.0104601	NCEH1,SOAT2,PCSK9
Chemical carcinogenesis - receptor activation	hsa05207	5	409	114	61686	6.61498	0.00101588	0.010482	RPS6KA2,CACNA1A,BCL2,PPARA,ARRB1
Toxoplasmosis	hsa05145	4	409	74	61686	8.15251	0.00151986	0.0107815	IRAK4,MAPK12,BCL2,NOS2
Thermogenesis	hsa04714	4	409	74	61686	8.15251	0.00151986	0.0107815	PRKAA2,RPS6KA2,PRKG2,MAPK12
Leukocyte transendothelial migration	hsa04670	4	409	70	61686	8.61837	0.00123653	0.0107959	CLDN23,PTK2B,MAPK12,SIPA1
Mucin type O-glycan biosynthesis	hsa00512	2	409	8	61686	37.7054	0.00119592	0.010859	GALNT6,GCNT1
Alcoholism	hsa05034	4	409	69	61686	8.74328	0.00117194	0.0110846	HIST1H4B,HIST4H4,SHC2,HDAC9
Dopaminergic synapse	hsa04728	4	409	73	61686	8.26419	0.00144518	0.0113123	CACNA1A,MAPK12,GRIA3,ARRB1
Peroxisome	hsa04146	3	409	36	61686	12.5685	0.00175622	0.0120807	PEX26,PHYH,NOS2
Focal adhesion	hsa04510	5	409	130	61686	5.80083	0.00181759	0.0121351	TNC,PAK6,BCL2,SHC2,COL1A1
Diabetic cardiomyopathy	hsa05415	4	409	79	61686	7.63653	0.00193387	0.0125425	COL3A1,MAPK12,PPARA,COL1A1
Various types of N-glycan biosynthesis	hsa00513	2	409	11	61686	27.4221	0.00231839	0.0142236	B4GALNT4,MGAT4A
Neutrophil extracellular trap formation	hsa04613	4	409	83	61686	7.26851	0.0023167	0.0146081	HIST1H4B,MAPK12,HIST4H4,HDAC9
Biosynthesis of amino acids	hsa01230	3	409	41	61686	11.0357	0.00255867	0.0152847	ALDOC,ENO2,PSAT1
Platelet activation	hsa04611	4	409	86	61686	7.01495	0.00263594	0.0153425	COL3A1,PRKG2,MAPK12,COL1A1
Proteoglycans in cancer	hsa05205	5	409	144	61686	5.23686	0.00283346	0.0156877	TIMP3,GPC3,PLCE1,MAPK12,COL1A1
SNARE interactions in vesicular transport	hsa04130	2	409	12	61686	25.1369	0.00276989	0.0157191	STX11,GOSR1
Long-term depression	hsa04730	3	409	43	61686	10.5224	0.00293334	0.015854	CACNA1A,PRKG2,GRIA3
Apelin signaling pathway	hsa04371	4	409	92	61686	6.55746	0.00336242	0.017347	PRKAA2,MEF2C,ACTA2,NOS2
Epithelial cell signaling in Helicobacter pylori infection	hsa05120	3	409	45	61686	10.0548	0.00334005	0.0176324	PTPRZ1,MAPK12,NOD1
Ras signaling pathway	hsa04014	5	409	152	61686	4.96123	0.00357069	0.0180121	FGFR2,PAK6,PLCE1,CSF1R,SHC2
N-Glycan biosynthesis	hsa00510	2	409	14	61686	21.5459	0.00378575	0.0186819	MGAT4A,MGAT3
Fluid shear stress and atherosclerosis	hsa05418	4	409	97	61686	6.21944	0.00406326	0.0192158	PRKAA2,MEF2C,MAPK12,BCL2
PI3K-Akt signaling pathway	hsa04151	6	409	224	61686	4.03986	0.00400862	0.0193608	PRKAA2,FGFR2,TNC,BCL2,CSF1R,COL1A1
PPAR signaling pathway	hsa03320	3	409	49	61686	9.23397	0.00425285	0.019702	CYP8B1,ACSBG1,PPARA
Homologous recombination	hsa03440	2	409	15	61686	20.1095	0.00434909	0.0197449	RAD51C,XRCC2
Adipocytokine signaling pathway	hsa04920	3	409	51	61686	8.87185	0.00476045	0.0211887	PRKAA2,ACSBG1,PPARA
Progesterone-mediated oocyte maturation	hsa04914	3	409	52	61686	8.70124	0.00502736	0.0215323	RPS6KA2,CCNB1,MAPK12
Starch and sucrose metabolism	hsa00500	2	409	16	61686	18.8527	0.00494868	0.0216029	AGL,AMY2B
Cell adhesion molecules	hsa04514	3	409	54	61686	8.37897	0.0055878	0.0230624	CLDN23,VTCN1,NECTIN2
Circadian rhythm	hsa04710	2	409	17	61686	17.7437	0.00558402	0.0234736	PRKAA2,RORB
Pathogenic Escherichia coli infection	hsa05130	4	409	108	61686	5.58598	0.00593835	0.0240715	CLDN23,IRAK4,MAPK12,WIPF2
Leishmaniasis	hsa05140	3	409	57	61686	7.93797	0.00649615	0.0241742	IRAK4,MAPK12,NOS2
Purine metabolism	hsa00230	3	409	57	61686	7.93797	0.00649615	0.0241742	ENPP4,PDE4B,GDA
Protein processing in endoplasmic reticulum	hsa04141	3	409	56	61686	8.07972	0.00618425	0.0242039	BCL2,ERO1B,HYOU1
Pyrimidine metabolism	hsa00240	2	409	19	61686	15.8759	0.00695997	0.0243064	DPYD,CMPK2
Nicotine addiction	hsa05033	2	409	19	61686	15.8759	0.00695997	0.0243064	CACNA1A,GRIA3
cGMP-PKG signaling pathway	hsa04022	4	409	110	61686	5.48442	0.00633171	0.024361	MEF2C,PRKG2,KCNMB4,TRPC6
Transcriptional misregulation in cancer	hsa05202	4	409	109	61686	5.53473	0.00613293	0.0244241	ETV5,MEF2C,CSF1R,GRIA3
Retrograde endocannabinoid signaling	hsa04723	3	409	58	61686	7.80111	0.00681727	0.0245638	CACNA1A,MAPK12,GRIA3
NOD-like receptor signaling pathway	hsa04621	4	409	112	61686	5.38648	0.00674198	0.0246844	IRAK4,MAPK12,BCL2,NOD1
Pancreatic secretion	hsa04972	3	409	60	61686	7.54108	0.0074874	0.0249947	CPA1,AMY2B,CELA2B
Oocyte meiosis	hsa04114	3	409	60	61686	7.54108	0.0074874	0.0249947	RPS6KA2,CCNB1,MAPK12
Tuberculosis	hsa05152	4	409	115	61686	5.24597	0.00738977	0.0254163	IRAK4,MAPK12,BCL2,NOS2
Amoebiasis	hsa05146	3	409	62	61686	7.29782	0.00819512	0.0269608	COL3A1,NOS2,COL1A1
Circadian entrainment	hsa04713	3	409	63	61686	7.18198	0.00856322	0.0269979	NOS1AP,PRKG2,GRIA3
Drug metabolism - other enzymes	hsa00983	2	409	21	61686	14.364	0.00847301	0.0270898	CES1,DPYD
Olfactory transduction	hsa04740	2	409	21	61686	14.364	0.00847301	0.0270898	PRKG2,ARRB1
Viral carcinogenesis	hsa05203	4	409	122	61686	4.94497	0.00905733	0.027784	HIST1H4B,HIST4H4,HDAC9,GTF2H2C
EGFR tyrosine kinase inhibitor resistance	hsa01521	3	409	64	61686	7.06976	0.00894089	0.0278025	FGFR2,BCL2,SHC2
Non-alcoholic fatty liver disease	hsa04932	3	409	65	61686	6.96099	0.00932817	0.0282333	PRKAA2,MAPK12,PPARA
Carbon metabolism	hsa01200	3	409	67	61686	6.7532	0.0101318	0.030262	ALDOC,ENO2,PSAT1
Hepatitis B	hsa05161	4	409	128	61686	4.71317	0.0106676	0.0314486	PTK2B,IRAK4,MAPK12,BCL2
Insulin resistance	hsa04931	3	409	69	61686	6.55746	0.0109744	0.0315339	PRKAA2,RPS6KA2,PPARA
Glutamatergic synapse	hsa04724	3	409	69	61686	6.55746	0.0109744	0.0315339	CACNA1A,HOMER2,GRIA3
Arginine and proline metabolism	hsa00330	2	409	25	61686	12.0657	0.0118951	0.0329291	NOS2,CKMT1B
Hedgehog signaling pathway	hsa04340	2	409	25	61686	12.0657	0.0118951	0.0329291	BCL2,ARRB1
Spinocerebellar ataxia	hsa05017	3	409	71	61686	6.37274	0.0118563	0.0336422	KCNC3,CACNA1A,GRIA3
Salmonella infection	hsa05132	4	409	137	61686	4.40355	0.0134115	0.0366796	IRAK4,MAPK12,BCL2,NOD1
mTOR signaling pathway	hsa04150	3	409	75	61686	6.03286	0.0137391	0.0366916	PRKAA2,SLC7A5,RPS6KA2
Endocrine resistance	hsa01522	3	409	75	61686	6.03286	0.0137391	0.0366916	MAPK12,BCL2,SHC2
Tight junction	hsa04530	3	409	76	61686	5.95348	0.0142348	0.0371415	PRKAA2,CLDN23,PARD6B
Chagas disease	hsa05142	3	409	76	61686	5.95348	0.0142348	0.0371415	IRAK4,MAPK12,NOS2
Prostate cancer	hsa05215	3	409	77	61686	5.87616	0.0147406	0.038024	FGFR2,ETV5,BCL2
cAMP signaling pathway	hsa04024	4	409	142	61686	4.24849	0.0151126	0.0385457	PLCE1,PPARA,GRIA3,PDE4B
Vascular smooth muscle contraction	hsa04270	3	409	79	61686	5.7274	0.0157823	0.0398064	ACTA2,PPP1R14A,KCNMB4
Neuroactive ligand-receptor interaction	hsa04080	4	409	150	61686	4.02191	0.0181065	0.0446758	OPRM1,P2RX2,GRIA3,CHRNA1
Systemic lupus erythematosus	hsa05322	2	409	31	61686	9.73042	0.0179627	0.0448081	HIST1H4B,HIST4H4
Vitamin B6 metabolism	hsa00750	1	409	3	61686	50.2738	0.0197598	0.0482309	PSAT1
