# Supplementary material for: Differential chondrogenic differentiation between iPSC derived from healthy and OA cartilage is associated with changes in epigenetic regulation and metabolic transcriptomic signatures
Source: eLife. 2023 Jan 30;12:e83138. doi: 10.7554/eLife.83138 (PMC9886280; doi:10.7554/eLife.83138)
Supplement: Figure 5—source data 1. [file elife-83138-fig5-data1.xlsx]

## Sheet: Sheet1
#node1	node2	node1_string_id	node2_string_id	neighborhood_on_chromosome	gene_fusion	phylogenetic_cooccurrence	homology	coexpression	experimentally_determined_interaction	database_annotated	automated_textmining	combined_score
AK3	DCK	9606.ENSP00000371230	9606.ENSP00000286648	0	0	0	0	0	0	0.9	0.152	0.911
AKT1S1	IGF1R	9606.ENSP00000375711	9606.ENSP00000268035	0	0	0	0	0	0.056	0	0.459	0.467
AKT1S1	DEPTOR	9606.ENSP00000375711	9606.ENSP00000286234	0	0	0	0	0	0	0.9	0.99	0.998
AKT1S1	PDPK1	9606.ENSP00000375711	9606.ENSP00000344220	0	0	0	0	0.062	0	0.65	0.494	0.819
AKT1S1	PRKAA2	9606.ENSP00000375711	9606.ENSP00000360290	0	0	0	0	0	0	0.6	0.257	0.69
AKT1S1	RPS6KA3	9606.ENSP00000375711	9606.ENSP00000368884	0	0	0	0	0	0	0	0.462	0.462
AKT1S1	SQSTM1	9606.ENSP00000375711	9606.ENSP00000374455	0	0	0	0	0.063	0.27	0	0.295	0.475
AKT1S1	MYC	9606.ENSP00000375711	9606.ENSP00000479618	0	0	0	0	0.065	0	0	0.418	0.433
AKT1S1	PRKCA	9606.ENSP00000375711	9606.ENSP00000408695	0	0	0	0	0	0	0	0.504	0.504
ALDOB	PCK2	9606.ENSP00000363988	9606.ENSP00000216780	0	0	0	0	0.108	0	0	0.439	0.478
ALDOB	APOB	9606.ENSP00000363988	9606.ENSP00000233242	0	0	0	0	0.525	0.056	0	0.187	0.604
ALDOB	APOA1	9606.ENSP00000363988	9606.ENSP00000236850	0	0	0	0	0.278	0	0	0.228	0.419
ALDOB	HK2	9606.ENSP00000363988	9606.ENSP00000290573	0	0	0	0	0.064	0	0.6	0.468	0.783
ALDOB	ENO3	9606.ENSP00000363988	9606.ENSP00000324105	0	0	0	0	0.221	0.212	0.6	0.556	0.876
ALDOB	ECHS1	9606.ENSP00000363988	9606.ENSP00000357535	0	0	0	0	0.088	0.373	0	0.186	0.494
ANXA6	APOA1	9606.ENSP00000346550	9606.ENSP00000236850	0	0	0	0	0.062	0	0	0.441	0.453
ANXA6	FN1	9606.ENSP00000346550	9606.ENSP00000346839	0	0	0	0	0.062	0	0	0.392	0.405
ANXA6	PRKCA	9606.ENSP00000346550	9606.ENSP00000408695	0	0	0	0	0	0.27	0	0.9	0.924
AOX1	SPARC	9606.ENSP00000363832	9606.ENSP00000231061	0	0	0	0	0.065	0.609	0	0.045	0.62
AOX1	GDA	9606.ENSP00000363832	9606.ENSP00000238018	0.167	0	0.236	0	0.09	0	0	0.298	0.539
AOX1	GOT1	9606.ENSP00000363832	9606.ENSP00000359539	0	0	0	0	0	0	0	0.428	0.428
APOA1	APOB	9606.ENSP00000236850	9606.ENSP00000233242	0	0	0	0	0.793	0.698	0.72	0.928	0.998
APOA1	CYP8B1	9606.ENSP00000236850	9606.ENSP00000318867	0	0	0	0	0.085	0	0	0.383	0.411
APOA1	STAT3	9606.ENSP00000236850	9606.ENSP00000264657	0	0	0	0	0	0	0	0.475	0.475
APOA1	VCAM1	9606.ENSP00000236850	9606.ENSP00000294728	0	0	0	0	0.062	0.13	0	0.565	0.614
APOA1	FN1	9606.ENSP00000236850	9606.ENSP00000346839	0	0	0	0	0.076	0.153	0	0.577	0.64
APOA1	SMARCD3	9606.ENSP00000236850	9606.ENSP00000262188	0	0	0	0	0	0	0.9	0	0.9
APOA1	SP1	9606.ENSP00000236850	9606.ENSP00000329357	0	0	0	0	0	0	0.9	0.172	0.913
APOB	PCK2	9606.ENSP00000233242	9606.ENSP00000216780	0	0	0	0	0.27	0	0	0.306	0.471
APOB	SPARC	9606.ENSP00000233242	9606.ENSP00000231061	0	0	0	0	0	0	0.5	0.081	0.52
APOB	VEGFA	9606.ENSP00000233242	9606.ENSP00000478570	0	0	0	0	0.061	0	0	0.391	0.403
APOB	FN1	9606.ENSP00000233242	9606.ENSP00000346839	0	0	0	0	0.086	0	0	0.393	0.421
APOB	VCAM1	9606.ENSP00000233242	9606.ENSP00000294728	0	0	0	0	0.061	0	0	0.565	0.574
AR	MMP2	9606.ENSP00000363822	9606.ENSP00000219070	0	0	0	0	0.061	0	0	0.403	0.415
AR	WDR77	9606.ENSP00000363822	9606.ENSP00000235090	0	0	0	0	0	0.495	0	0.891	0.942
AR	SOX9	9606.ENSP00000363822	9606.ENSP00000245479	0	0	0	0	0	0.087	0	0.591	0.611
AR	PRDX1	9606.ENSP00000363822	9606.ENSP00000262746	0	0	0	0	0	0.282	0.9	0.638	0.971
AR	HDAC4	9606.ENSP00000363822	9606.ENSP00000264606	0	0	0	0	0	0.505	0	0.429	0.706
AR	STAT3	9606.ENSP00000363822	9606.ENSP00000264657	0	0	0	0	0	0.68	0	0.986	0.995
AR	SMARCA2	9606.ENSP00000363822	9606.ENSP00000265773	0	0	0	0	0.062	0.505	0	0.243	0.618
AR	IGF1R	9606.ENSP00000363822	9606.ENSP00000268035	0	0	0	0	0.052	0.077	0	0.729	0.742
AR	USP12	9606.ENSP00000363822	9606.ENSP00000282344	0	0	0	0	0	0.675	0.6	0.292	0.899
AR	KMT2D	9606.ENSP00000363822	9606.ENSP00000301067	0	0	0	0	0	0.337	0	0.342	0.545
AR	FOS	9606.ENSP00000363822	9606.ENSP00000306245	0	0	0	0	0.054	0.176	0	0.512	0.587
AR	PRKDC	9606.ENSP00000363822	9606.ENSP00000313420	0	0	0	0	0	0.496	0	0.36	0.664
AR	SP1	9606.ENSP00000363822	9606.ENSP00000329357	0	0	0	0	0	0.869	0	0.813	0.974
AR	SMAD3	9606.ENSP00000363822	9606.ENSP00000332973	0	0	0	0	0	0.684	0.9	0.96	0.998
AR	FN1	9606.ENSP00000363822	9606.ENSP00000346839	0	0	0	0	0.061	0	0	0.391	0.403
AR	GADD45A	9606.ENSP00000363822	9606.ENSP00000360025	0	0	0	0	0	0	0	0.682	0.682
AR	STK4	9606.ENSP00000363822	9606.ENSP00000361892	0	0	0	0	0	0	0	0.457	0.457
AR	ATRX	9606.ENSP00000363822	9606.ENSP00000362441	0	0	0	0	0	0.182	0	0.895	0.91
AR	PRMT2	9606.ENSP00000363822	9606.ENSP00000380759	0	0	0	0	0	0.07	0	0.45	0.467
AR	SNAI2	9606.ENSP00000363822	9606.ENSP00000380034	0	0	0	0	0	0.068	0	0.468	0.482
AR	VEGFA	9606.ENSP00000363822	9606.ENSP00000478570	0	0	0	0	0	0	0	0.6	0.6
AR	WHSC1	9606.ENSP00000363822	9606.ENSP00000372351	0	0	0	0	0	0.309	0	0.567	0.688
AR	MYC	9606.ENSP00000363822	9606.ENSP00000479618	0	0	0	0	0	0.069	0	0.832	0.837
AR	HIF1A	9606.ENSP00000363822	9606.ENSP00000437955	0	0	0	0	0	0.521	0	0.722	0.861
ARRB1	IGF1R	9606.ENSP00000409581	9606.ENSP00000268035	0	0	0	0	0.049	0.501	0	0.893	0.944
ARRB1	FN1	9606.ENSP00000409581	9606.ENSP00000346839	0	0	0	0	0	0	0.5	0.218	0.592
ARRB1	NRAS	9606.ENSP00000409581	9606.ENSP00000358548	0	0	0	0	0.062	0.056	0.6	0.085	0.632
ARRB1	HIF1A	9606.ENSP00000409581	9606.ENSP00000437955	0	0	0	0	0	0.305	0	0.223	0.437
ARRB1	MYC	9606.ENSP00000409581	9606.ENSP00000479618	0	0	0	0	0	0	0	0.457	0.457
ARRB1	TRAF6	9606.ENSP00000409581	9606.ENSP00000433623	0	0	0	0	0.062	0.581	0	0.193	0.655
ASNS	PCK2	9606.ENSP00000175506	9606.ENSP00000216780	0	0	0	0	0.097	0	0	0.391	0.427
ASNS	SLC3A2	9606.ENSP00000175506	9606.ENSP00000367123	0	0	0	0	0.15	0	0	0.443	0.507
ASNS	PSPH	9606.ENSP00000175506	9606.ENSP00000378854	0.071	0	0	0	0.076	0	0	0.598	0.625
ASNS	SLC7A5	9606.ENSP00000175506	9606.ENSP00000261622	0	0	0	0	0.212	0	0	0.607	0.678
ASNS	SHMT2	9606.ENSP00000175506	9606.ENSP00000333667	0	0	0	0	0.189	0	0	0.632	0.688
ASNS	PSAT1	9606.ENSP00000175506	9606.ENSP00000365773	0	0	0	0	0.334	0	0	0.743	0.821
ASNS	GOT1	9606.ENSP00000175506	9606.ENSP00000359539	0	0	0	0	0.191	0	0.9	0.393	0.946
ATF2	TRAF6	9606.ENSP00000264110	9606.ENSP00000433623	0	0	0	0	0	0.244	0	0.261	0.417
ATF2	HDAC4	9606.ENSP00000264110	9606.ENSP00000264606	0	0	0	0	0.062	0.363	0	0.296	0.543
ATF2	TLE1	9606.ENSP00000264110	9606.ENSP00000365682	0	0	0	0	0	0.345	0	0.356	0.56
ATF2	MBD3	9606.ENSP00000264110	9606.ENSP00000412302	0	0	0	0	0	0	0.65	0.079	0.663
ATF2	SNAI2	9606.ENSP00000264110	9606.ENSP00000380034	0	0	0	0	0	0	0.65	0.199	0.708
ATF2	ATF7	9606.ENSP00000264110	9606.ENSP00000399465	0	0	0	0.942	0	0.785	0	0.623	0.792
ATF2	SMAD6	9606.ENSP00000264110	9606.ENSP00000288840	0	0	0	0	0	0.062	0.9	0.06	0.904
ATF2	BMPR1A	9606.ENSP00000264110	9606.ENSP00000361107	0	0	0	0	0.066	0.064	0.9	0.047	0.905
ATF2	BMPR2	9606.ENSP00000264110	9606.ENSP00000363708	0	0	0	0	0.063	0.064	0.9	0.111	0.911
ATF2	PRKCA	9606.ENSP00000264110	9606.ENSP00000408695	0	0	0	0	0	0	0.9	0.162	0.912
ATF2	FOS	9606.ENSP00000264110	9606.ENSP00000306245	0	0	0	0.568	0	0.894	0.6	0.702	0.969
ATF2	SMAD3	9606.ENSP00000264110	9606.ENSP00000332973	0	0	0	0	0.062	0.285	0.9	0.7	0.977
ATF7	FOS	9606.ENSP00000399465	9606.ENSP00000306245	0	0	0	0	0	0.874	0	0.561	0.942
ATRX	CBX5	9606.ENSP00000362441	9606.ENSP00000209875	0	0	0	0	0.099	0.568	0	0.955	0.981
ATRX	MSH6	9606.ENSP00000362441	9606.ENSP00000234420	0	0	0	0	0.065	0.066	0	0.479	0.505
ATRX	DNMT3A	9606.ENSP00000362441	9606.ENSP00000264709	0	0	0	0	0.076	0.056	0	0.74	0.754
ATRX	SMARCA2	9606.ENSP00000362441	9606.ENSP00000265773	0	0	0	0.553	0.112	0	0	0.8	0.426
ATRX	KMT2D	9606.ENSP00000362441	9606.ENSP00000301067	0	0	0	0	0.064	0.153	0	0.476	0.548
ATRX	PRKDC	9606.ENSP00000362441	9606.ENSP00000313420	0	0	0	0	0.084	0.354	0	0.661	0.782
ATRX	BRWD1	9606.ENSP00000362441	9606.ENSP00000330753	0	0	0	0	0.72	0.142	0	0.107	0.767
ATRX	SP100	9606.ENSP00000362441	9606.ENSP00000343023	0	0	0	0	0	0.061	0	0.75	0.755
ATRX	XRCC2	9606.ENSP00000362441	9606.ENSP00000352271	0	0	0	0	0	0	0	0.691	0.691
ATRX	TNKS2	9606.ENSP00000362441	9606.ENSP00000360689	0	0	0	0	0.108	0.066	0	0.702	0.73
ATRX	FGFR1	9606.ENSP00000362441	9606.ENSP00000393312	0	0	0	0	0	0.057	0	0.403	0.412
ATRX	MYC	9606.ENSP00000362441	9606.ENSP00000479618	0	0	0	0	0	0.067	0	0.457	0.471
ATRX	SETD2	9606.ENSP00000362441	9606.ENSP00000386759	0	0	0	0	0.121	0.153	0	0.521	0.612
ATRX	TP53BP1	9606.ENSP00000362441	9606.ENSP00000371475	0	0	0	0	0.094	0.15	0	0.551	0.624
ATRX	CBX1	9606.ENSP00000362441	9606.ENSP00000377060	0	0	0	0	0.065	0.38	0	0.417	0.632
BCL2	STAT3	9606.ENSP00000381185	9606.ENSP00000264657	0	0	0	0	0	0.153	0.9	0.307	0.936
BCL2	PRKAA2	9606.ENSP00000381185	9606.ENSP00000360290	0	0	0	0	0	0	0	0.434	0.434
BCL2	SQSTM1	9606.ENSP00000381185	9606.ENSP00000374455	0	0	0	0	0.062	0.486	0	0.166	0.562
BCL2	MYC	9606.ENSP00000381185	9606.ENSP00000479618	0	0	0	0	0	0.327	0	0.407	0.584
BCL2	HIF1A	9606.ENSP00000381185	9606.ENSP00000437955	0	0	0	0	0	0.538	0	0.324	0.674
BMPR1A	MSH6	9606.ENSP00000361107	9606.ENSP00000234420	0	0	0	0	0.067	0.056	0	0.602	0.618
BMPR1A	SOX9	9606.ENSP00000361107	9606.ENSP00000245479	0	0	0	0	0	0.061	0	0.522	0.532
BMPR1A	SMAD6	9606.ENSP00000361107	9606.ENSP00000288840	0	0	0	0	0.062	0.494	0.9	0.753	0.986
BMPR1A	SMAD3	9606.ENSP00000361107	9606.ENSP00000332973	0	0	0	0	0.062	0.26	0.8	0.585	0.934
BMPR1A	BMPR2	9606.ENSP00000361107	9606.ENSP00000363708	0	0	0	0.733	0.062	0.486	0.9	0.991	0.961
BMPR2	PIK3R3	9606.ENSP00000363708	9606.ENSP00000262741	0	0	0	0	0	0.102	0	0.463	0.498
BMPR2	STAT3	9606.ENSP00000363708	9606.ENSP00000264657	0	0	0	0	0.062	0.14	0	0.38	0.456
BMPR2	SMAD6	9606.ENSP00000363708	9606.ENSP00000288840	0	0	0	0	0.062	0.345	0.9	0.771	0.984
BMPR2	SMAD3	9606.ENSP00000363708	9606.ENSP00000332973	0	0	0	0	0.062	0.107	0.8	0.711	0.945
BMPR2	VEGFA	9606.ENSP00000363708	9606.ENSP00000478570	0	0	0	0	0	0	0	0.405	0.405
BMPR2	TGFBR1	9606.ENSP00000363708	9606.ENSP00000364133	0	0	0	0.744	0.062	0.469	0	0.919	0.602
BRDT	SMARCA2	9606.ENSP00000387822	9606.ENSP00000265773	0	0	0	0	0.148	0.213	0	0.418	0.576
BRDT	MYC	9606.ENSP00000387822	9606.ENSP00000479618	0	0	0	0	0.077	0.102	0	0.497	0.546
BRWD1	DNMT3A	9606.ENSP00000330753	9606.ENSP00000264709	0	0	0	0	0	0	0	0.469	0.469
CACNA1A	ME2	9606.ENSP00000353362	9606.ENSP00000321070	0	0	0	0	0	0	0	0.574	0.574
CACNA1A	PRKCA	9606.ENSP00000353362	9606.ENSP00000408695	0	0	0	0	0.063	0	0.8	0.113	0.819
CBX1	CBX5	9606.ENSP00000377060	9606.ENSP00000209875	0	0	0	0.96	0.13	0.75	0	0.892	0.781
CBX1	L3MBTL2	9606.ENSP00000377060	9606.ENSP00000216237	0	0	0	0	0.062	0.457	0	0.314	0.621
CBX1	PCGF1	9606.ENSP00000377060	9606.ENSP00000233630	0	0	0	0	0.049	0.077	0	0.464	0.488
CBX1	HIRA	9606.ENSP00000377060	9606.ENSP00000263208	0	0	0	0	0.093	0.152	0	0.352	0.458
CBX1	HDAC4	9606.ENSP00000377060	9606.ENSP00000264606	0	0	0	0	0.062	0.262	0	0.265	0.446
CBX1	DNMT3A	9606.ENSP00000377060	9606.ENSP00000264709	0	0	0	0	0	0.27	0	0.535	0.646
CBX1	SMARCA2	9606.ENSP00000377060	9606.ENSP00000265773	0	0	0	0	0.083	0.279	0	0.337	0.524
CBX1	ZMYM3	9606.ENSP00000377060	9606.ENSP00000322845	0	0	0	0	0.063	0.453	0	0.261	0.589
CBX1	SP100	9606.ENSP00000377060	9606.ENSP00000343023	0	0	0	0	0.062	0.463	0	0.082	0.497
CBX1	TP53BP1	9606.ENSP00000377060	9606.ENSP00000371475	0	0	0	0	0.062	0	0	0.587	0.596
CBX1	WHSC1	9606.ENSP00000377060	9606.ENSP00000372351	0	0	0	0	0.062	0.178	0	0.313	0.424
CBX1	SETD2	9606.ENSP00000377060	9606.ENSP00000386759	0	0	0	0	0.066	0.178	0	0.296	0.413
CBX1	HDAC9	9606.ENSP00000377060	9606.ENSP00000408617	0	0	0	0	0.062	0.262	0	0.263	0.445
CBX5	JAK2	9606.ENSP00000209875	9606.ENSP00000371067	0	0	0	0	0	0.056	0	0.4	0.409
CBX5	HIRA	9606.ENSP00000209875	9606.ENSP00000263208	0	0	0	0	0.093	0.152	0	0.309	0.422
CBX5	ZMYM3	9606.ENSP00000209875	9606.ENSP00000322845	0	0	0	0	0.049	0.377	0	0.107	0.425
CBX5	SETD2	9606.ENSP00000209875	9606.ENSP00000386759	0	0	0	0	0.063	0.178	0	0.327	0.436
CBX5	HDAC4	9606.ENSP00000209875	9606.ENSP00000264606	0	0	0	0	0.062	0.394	0	0.235	0.528
CBX5	HDAC9	9606.ENSP00000209875	9606.ENSP00000408617	0	0	0	0	0.062	0.394	0	0.269	0.548
CBX5	TP53BP1	9606.ENSP00000209875	9606.ENSP00000371475	0	0	0	0	0.085	0	0	0.536	0.558
CBX5	ING2	9606.ENSP00000209875	9606.ENSP00000307183	0	0	0	0	0	0	0	0.563	0.563
CBX5	SMARCA2	9606.ENSP00000209875	9606.ENSP00000265773	0	0	0	0	0.083	0.562	0	0.337	0.71
CBX5	DNMT3A	9606.ENSP00000209875	9606.ENSP00000264709	0	0	0	0	0	0.745	0	0.417	0.844
CBX5	SP100	9606.ENSP00000209875	9606.ENSP00000343023	0	0	0	0	0.062	0.877	0	0.232	0.904
CD276	STAT3	9606.ENSP00000320084	9606.ENSP00000264657	0	0	0	0	0	0	0	0.504	0.504
CD276	DNMT3A	9606.ENSP00000320084	9606.ENSP00000264709	0	0	0	0	0.065	0	0	0.397	0.412
CD276	STAT1	9606.ENSP00000320084	9606.ENSP00000354394	0	0	0	0	0	0	0	0.456	0.456
CD276	VEGFA	9606.ENSP00000320084	9606.ENSP00000478570	0	0	0	0	0.069	0	0	0.454	0.469
CD276	FN1	9606.ENSP00000320084	9606.ENSP00000346839	0	0	0	0	0.139	0	0	0.508	0.558
COL12A1	MMP2	9606.ENSP00000325146	9606.ENSP00000219070	0	0	0	0	0.265	0.243	0	0.377	0.624
COL12A1	COL1A1	9606.ENSP00000325146	9606.ENSP00000225964	0	0	0	0.557	0.462	0.169	0.3	0.673	0.759
COL12A1	LAMC1	9606.ENSP00000325146	9606.ENSP00000258341	0	0	0	0	0.254	0.102	0	0.463	0.609
COL12A1	THBS1	9606.ENSP00000325146	9606.ENSP00000260356	0	0	0	0	0.215	0.056	0	0.377	0.499
COL12A1	COL6A3	9606.ENSP00000325146	9606.ENSP00000295550	0	0	0	0.557	0.232	0	0.3	0.674	0.603
COL12A1	COL3A1	9606.ENSP00000325146	9606.ENSP00000304408	0	0	0	0.557	0.509	0.169	0.3	0.668	0.779
COL12A1	SNAI2	9606.ENSP00000325146	9606.ENSP00000380034	0	0	0	0	0.367	0	0	0.139	0.432
COL12A1	FN1	9606.ENSP00000325146	9606.ENSP00000346839	0	0	0	0.564	0.347	0.056	0	0.455	0.478
COL12A1	CTGF	9606.ENSP00000325146	9606.ENSP00000356954	0	0	0	0	0.346	0	0	0.322	0.538
COL12A1	COL6A1	9606.ENSP00000325146	9606.ENSP00000355180	0	0	0	0.585	0.287	0	0.3	0.703	0.629
COL12A1	COL5A1	9606.ENSP00000325146	9606.ENSP00000360882	0	0	0	0.553	0.349	0.243	0.3	0.733	0.746
COL12A1	SERPINH1	9606.ENSP00000325146	9606.ENSP00000434412	0	0	0	0	0.23	0.059	0.6	0.338	0.782
COL1A1	MMP2	9606.ENSP00000225964	9606.ENSP00000219070	0	0	0	0	0.879	0.355	0	0.612	0.967
COL1A1	SMAD6	9606.ENSP00000225964	9606.ENSP00000288840	0	0	0	0	0.076	0.155	0	0.305	0.409
COL1A1	VCAM1	9606.ENSP00000225964	9606.ENSP00000294728	0	0	0	0	0.112	0	0	0.379	0.424
COL1A1	MMP10	9606.ENSP00000225964	9606.ENSP00000279441	0	0	0	0	0.065	0.059	0	0.402	0.428
COL1A1	HIF1A	9606.ENSP00000225964	9606.ENSP00000437955	0	0	0	0	0	0	0	0.438	0.438
COL1A1	TGFBR2	9606.ENSP00000225964	9606.ENSP00000351905	0	0	0	0	0.062	0.058	0	0.468	0.488
COL1A1	VEGFA	9606.ENSP00000225964	9606.ENSP00000478570	0	0	0	0	0.076	0	0	0.505	0.523
COL1A1	TGFBR1	9606.ENSP00000225964	9606.ENSP00000364133	0	0	0	0	0	0.056	0	0.523	0.53
COL1A1	SNAI2	9606.ENSP00000225964	9606.ENSP00000380034	0	0	0	0	0.314	0	0	0.366	0.546
COL1A1	THBS1	9606.ENSP00000225964	9606.ENSP00000260356	0	0	0	0.54	0.173	0.282	0	0.625	0.555
COL1A1	LAMC1	9606.ENSP00000225964	9606.ENSP00000258341	0	0	0	0	0.21	0.13	0	0.499	0.626
COL1A1	PTK2	9606.ENSP00000225964	9606.ENSP00000341189	0	0	0	0	0.054	0	0.6	0.296	0.71
COL1A1	SOX9	9606.ENSP00000225964	9606.ENSP00000245479	0	0	0	0	0.088	0.056	0	0.716	0.734
COL1A1	SMAD3	9606.ENSP00000225964	9606.ENSP00000332973	0	0	0	0	0	0.373	0	0.626	0.756
COL1A1	SP1	9606.ENSP00000225964	9606.ENSP00000329357	0	0	0	0	0	0.282	0	0.676	0.757
COL1A1	CTGF	9606.ENSP00000225964	9606.ENSP00000356954	0	0	0	0	0.343	0	0	0.744	0.824
COL1A1	COL6A3	9606.ENSP00000225964	9606.ENSP00000295550	0	0	0	0.574	0.768	0	0.3	0.702	0.88
COL1A1	SERPINH1	9606.ENSP00000225964	9606.ENSP00000434412	0	0	0	0	0.4	0.183	0.6	0.665	0.925
COL1A1	FN1	9606.ENSP00000225964	9606.ENSP00000346839	0	0	0	0	0.356	0.701	0	0.757	0.949
COL1A1	COL5A1	9606.ENSP00000225964	9606.ENSP00000360882	0	0	0.42	0.85	0.779	0.192	0.72	0.82	0.955
COL1A1	COL6A1	9606.ENSP00000225964	9606.ENSP00000355180	0	0	0	0.596	0.914	0	0.3	0.735	0.956
COL1A1	COL3A1	9606.ENSP00000225964	9606.ENSP00000304408	0	0	0.439	0.951	0.944	0	0.8	0.892	0.989
COL1A1	SPARC	9606.ENSP00000225964	9606.ENSP00000231061	0	0	0	0	0.94	0.515	0	0.669	0.989
COL3A1	MMP2	9606.ENSP00000304408	9606.ENSP00000219070	0	0	0	0	0.478	0.153	0	0.558	0.787
COL3A1	SPARC	9606.ENSP00000304408	9606.ENSP00000231061	0	0	0	0	0.568	0.727	0	0.548	0.942
COL3A1	SOX9	9606.ENSP00000304408	9606.ENSP00000245479	0	0	0	0	0.076	0.056	0	0.443	0.472
COL3A1	LAMC1	9606.ENSP00000304408	9606.ENSP00000258341	0	0	0	0	0.156	0.13	0	0.498	0.6
COL3A1	THBS1	9606.ENSP00000304408	9606.ENSP00000260356	0	0	0	0	0.155	0.282	0	0.425	0.621
COL3A1	VCAM1	9606.ENSP00000304408	9606.ENSP00000294728	0	0	0	0	0.222	0	0	0.325	0.452
COL3A1	COL6A3	9606.ENSP00000304408	9606.ENSP00000295550	0	0	0	0.571	0.802	0	0.3	0.735	0.9
COL3A1	SNAI2	9606.ENSP00000304408	9606.ENSP00000380034	0	0	0	0	0.33	0	0	0.315	0.522
COL3A1	TGFBR2	9606.ENSP00000304408	9606.ENSP00000351905	0	0	0	0	0.092	0.058	0	0.563	0.593
COL3A1	TGFBR1	9606.ENSP00000304408	9606.ENSP00000364133	0	0	0	0	0	0.056	0	0.596	0.603
COL3A1	SMAD3	9606.ENSP00000304408	9606.ENSP00000332973	0	0	0	0	0.062	0.182	0	0.575	0.645
COL3A1	CTGF	9606.ENSP00000304408	9606.ENSP00000356954	0	0	0	0	0.232	0	0	0.669	0.735
COL3A1	FN1	9606.ENSP00000304408	9606.ENSP00000346839	0	0	0	0	0.343	0.056	0	0.686	0.789
COL3A1	SERPINH1	9606.ENSP00000304408	9606.ENSP00000434412	0	0	0	0	0.305	0.182	0.6	0.469	0.863
COL3A1	COL5A1	9606.ENSP00000304408	9606.ENSP00000360882	0	0	0.401	0.841	0.643	0	0.72	0.818	0.914
COL3A1	COL6A1	9606.ENSP00000304408	9606.ENSP00000355180	0	0	0	0.602	0.891	0	0.3	0.737	0.943
COL5A1	MMP2	9606.ENSP00000360882	9606.ENSP00000219070	0	0	0	0	0.555	0.541	0	0.391	0.865
COL5A1	SPARC	9606.ENSP00000360882	9606.ENSP00000231061	0	0	0	0	0.369	0.345	0	0.437	0.747
COL5A1	LAMC1	9606.ENSP00000360882	9606.ENSP00000258341	0	0	0	0	0.226	0.13	0	0.543	0.665
COL5A1	THBS1	9606.ENSP00000360882	9606.ENSP00000260356	0	0	0	0	0.132	0.47	0	0.424	0.712
COL5A1	TNC	9606.ENSP00000360882	9606.ENSP00000265131	0	0	0	0	0.229	0.27	0	0.168	0.491
COL5A1	COL6A3	9606.ENSP00000360882	9606.ENSP00000295550	0	0	0	0.561	0.488	0.192	0.3	0.675	0.776
COL5A1	SMAD3	9606.ENSP00000360882	9606.ENSP00000332973	0	0	0	0	0.08	0.182	0	0.363	0.479
COL5A1	FN1	9606.ENSP00000360882	9606.ENSP00000346839	0	0	0	0	0.373	0.281	0	0.518	0.764
COL5A1	COL6A1	9606.ENSP00000360882	9606.ENSP00000355180	0	0	0	0.606	0.756	0.192	0.3	0.751	0.893
COL5A1	CTGF	9606.ENSP00000360882	9606.ENSP00000356954	0	0	0	0	0.231	0	0	0.386	0.507
COL5A1	TGFBR1	9606.ENSP00000360882	9606.ENSP00000364133	0	0	0	0	0	0.056	0	0.405	0.414
COL5A1	SNAI2	9606.ENSP00000360882	9606.ENSP00000380034	0	0	0	0	0.319	0	0	0.244	0.463
COL5A1	SERPINH1	9606.ENSP00000360882	9606.ENSP00000434412	0	0	0	0	0.298	0.305	0.6	0.467	0.882
COL6A1	MMP2	9606.ENSP00000355180	9606.ENSP00000219070	0	0	0	0	0.785	0.145	0	0.326	0.865
COL6A1	SPARC	9606.ENSP00000355180	9606.ENSP00000231061	0	0	0	0	0.794	0.073	0	0.374	0.87
COL6A1	LAMC1	9606.ENSP00000355180	9606.ENSP00000258341	0	0	0	0	0.162	0.102	0	0.421	0.526
COL6A1	THBS1	9606.ENSP00000355180	9606.ENSP00000260356	0	0	0	0	0.099	0.056	0.5	0.375	0.698
COL6A1	COL6A3	9606.ENSP00000355180	9606.ENSP00000295550	0	0	0	0.66	0.855	0	0.9	0.952	0.989
COL6A1	PTK2	9606.ENSP00000355180	9606.ENSP00000341189	0	0	0	0	0.072	0	0.6	0.121	0.645
COL6A1	FN1	9606.ENSP00000355180	9606.ENSP00000346839	0	0	0	0	0.305	0.056	0	0.518	0.656
COL6A1	CTGF	9606.ENSP00000355180	9606.ENSP00000356954	0	0	0	0	0.231	0	0	0.324	0.458
COL6A1	SERPINH1	9606.ENSP00000355180	9606.ENSP00000434412	0	0	0	0	0.259	0.059	0.6	0.309	0.781
COL6A3	MMP2	9606.ENSP00000295550	9606.ENSP00000219070	0	0	0	0	0.357	0.227	0	0.25	0.595
COL6A3	SPARC	9606.ENSP00000295550	9606.ENSP00000231061	0	0	0	0	0.293	0.073	0	0.262	0.474
COL6A3	LAMC1	9606.ENSP00000295550	9606.ENSP00000258341	0	0	0	0	0.097	0.102	0	0.407	0.477
COL6A3	THBS1	9606.ENSP00000295550	9606.ENSP00000260356	0	0	0	0	0.174	0.056	0.5	0.332	0.705
COL6A3	FGFR1	9606.ENSP00000295550	9606.ENSP00000393312	0	0	0	0	0.069	0.07	0	0.438	0.471
COL6A3	PTK2	9606.ENSP00000295550	9606.ENSP00000341189	0	0	0	0	0	0	0.6	0.06	0.608
COL6A3	FN1	9606.ENSP00000295550	9606.ENSP00000346839	0	0	0	0	0.229	0.056	0	0.505	0.608
COL6A3	SERPINH1	9606.ENSP00000295550	9606.ENSP00000434412	0	0	0	0	0.161	0.059	0.6	0.298	0.748
COX5A	DCK	9606.ENSP00000317780	9606.ENSP00000286648	0	0	0	0	0.166	0.395	0	0.54	0.747
COX5A	MPC2	9606.ENSP00000317780	9606.ENSP00000356820	0	0	0	0	0.187	0.787	0	0	0.819
COX5A	COX8A	9606.ENSP00000317780	9606.ENSP00000321260	0	0	0	0	0.414	0.818	0.8	0.668	0.992
COX8A	SLC3A2	9606.ENSP00000321260	9606.ENSP00000367123	0	0	0	0	0	0	0	0.769	0.769
CTGF	MMP2	9606.ENSP00000356954	9606.ENSP00000219070	0	0	0	0	0.261	0	0	0.677	0.752
CTGF	SPARC	9606.ENSP00000356954	9606.ENSP00000231061	0	0	0	0	0.251	0	0	0.603	0.69
CTGF	SOX9	9606.ENSP00000356954	9606.ENSP00000245479	0	0	0	0	0.139	0	0	0.509	0.559
CTGF	THBS1	9606.ENSP00000356954	9606.ENSP00000260356	0	0	0	0	0.191	0	0	0.727	0.77
CTGF	STAT3	9606.ENSP00000356954	9606.ENSP00000264657	0	0	0	0	0	0	0	0.505	0.505
CTGF	MMP10	9606.ENSP00000356954	9606.ENSP00000279441	0	0	0	0	0.062	0	0	0.425	0.437
CTGF	SMAD6	9606.ENSP00000356954	9606.ENSP00000288840	0	0	0	0	0.097	0	0	0.459	0.491
CTGF	VCAM1	9606.ENSP00000356954	9606.ENSP00000294728	0	0	0	0	0.095	0	0	0.479	0.508
CTGF	FOS	9606.ENSP00000356954	9606.ENSP00000306245	0	0	0	0	0.065	0	0	0.468	0.481
CTGF	SMAD3	9606.ENSP00000356954	9606.ENSP00000332973	0	0	0	0	0.065	0	0	0.757	0.763
CTGF	PTK2	9606.ENSP00000356954	9606.ENSP00000341189	0	0	0	0	0.087	0	0	0.393	0.422
CTGF	FN1	9606.ENSP00000356954	9606.ENSP00000346839	0	0	0	0	0.309	0.312	0	0.986	0.993
CTGF	TGFBR2	9606.ENSP00000356954	9606.ENSP00000351905	0	0	0	0	0.079	0	0.9	0.656	0.965
CTGF	MYC	9606.ENSP00000356954	9606.ENSP00000479618	0	0	0	0	0.062	0	0	0.52	0.531
CTGF	SERPINH1	9606.ENSP00000356954	9606.ENSP00000434412	0	0	0	0	0.232	0	0	0.421	0.536
CTGF	SNAI2	9606.ENSP00000356954	9606.ENSP00000380034	0	0	0	0	0.214	0	0	0.457	0.554
CTGF	HIF1A	9606.ENSP00000356954	9606.ENSP00000437955	0	0	0	0	0	0	0	0.621	0.622
CTGF	TGFBR1	9606.ENSP00000356954	9606.ENSP00000364133	0	0	0	0	0	0	0	0.701	0.702
CTGF	FGFR2	9606.ENSP00000356954	9606.ENSP00000410294	0	0	0	0	0.062	0.22	0	0.726	0.782
CTGF	VEGFA	9606.ENSP00000356954	9606.ENSP00000478570	0	0	0	0	0.062	0.27	0	0.981	0.986
DEPTOR	PRKCA	9606.ENSP00000286234	9606.ENSP00000408695	0	0	0	0	0	0	0	0.52	0.52
DNMT3A	WDR77	9606.ENSP00000264709	9606.ENSP00000235090	0	0	0	0	0	0	0.65	0.283	0.738
DNMT3A	SMARCD3	9606.ENSP00000264709	9606.ENSP00000262188	0	0	0	0	0.058	0	0.65	0.124	0.685
DNMT3A	HDAC4	9606.ENSP00000264709	9606.ENSP00000264606	0	0	0	0	0.062	0.056	0	0.518	0.535
DNMT3A	STAT3	9606.ENSP00000264709	9606.ENSP00000264657	0	0	0	0	0	0.102	0	0.478	0.511
DNMT3A	WHSC1	9606.ENSP00000264709	9606.ENSP00000372351	0	0	0	0	0.049	0.056	0	0.39	0.404
DNMT3A	HDAC8	9606.ENSP00000264709	9606.ENSP00000362674	0	0	0	0	0	0.056	0	0.418	0.428
DNMT3A	GADD45A	9606.ENSP00000264709	9606.ENSP00000360025	0	0	0	0	0	0	0	0.455	0.455
DNMT3A	HDAC9	9606.ENSP00000264709	9606.ENSP00000408617	0	0	0	0	0	0.056	0	0.47	0.478
DNMT3A	KMT2D	9606.ENSP00000264709	9606.ENSP00000301067	0	0	0	0	0.122	0.056	0	0.518	0.565
DNMT3A	SETD2	9606.ENSP00000264709	9606.ENSP00000386759	0	0	0	0	0.067	0.056	0	0.556	0.575
DNMT3A	JAK2	9606.ENSP00000264709	9606.ENSP00000371067	0	0	0	0	0	0	0	0.654	0.654
DNMT3A	NRAS	9606.ENSP00000264709	9606.ENSP00000358548	0	0	0	0	0	0	0	0.667	0.667
DNMT3A	SMARCA2	9606.ENSP00000264709	9606.ENSP00000265773	0	0	0	0	0	0.056	0.65	0.45	0.802
DNMT3A	MYC	9606.ENSP00000264709	9606.ENSP00000479618	0	0	0	0	0	0.499	0.9	0.968	0.998
DPF2	SMARCD3	9606.ENSP00000436901	9606.ENSP00000262188	0	0	0	0	0.079	0.878	0.54	0.634	0.978
DPF2	SMARCA2	9606.ENSP00000436901	9606.ENSP00000265773	0	0	0	0	0.062	0.886	0.54	0.588	0.977
DPF2	SS18L1	9606.ENSP00000436901	9606.ENSP00000333012	0	0	0	0	0.064	0.873	0.36	0.679	0.972
ECHS1	STAT3	9606.ENSP00000357535	9606.ENSP00000264657	0	0	0	0	0	0.27	0	0.459	0.588
EEA1	MYC	9606.ENSP00000317955	9606.ENSP00000479618	0	0	0	0	0	0	0	0.477	0.477
EEA1	SQSTM1	9606.ENSP00000317955	9606.ENSP00000374455	0	0	0	0	0	0.137	0	0.424	0.481
ELP3	FDXR	9606.ENSP00000256398	9606.ENSP00000416515	0	0	0	0	0.051	0	0	0.464	0.47
ELP3	GTF3C4	9606.ENSP00000256398	9606.ENSP00000361219	0	0	0	0	0.062	0	0	0.48	0.491
ELP3	HDAC8	9606.ENSP00000256398	9606.ENSP00000362674	0.079	0	0	0	0.064	0.139	0	0.457	0.543
ELP3	SETD2	9606.ENSP00000256398	9606.ENSP00000386759	0	0	0	0	0.07	0	0	0.56	0.574
ELP3	NOC2L	9606.ENSP00000256398	9606.ENSP00000317992	0	0	0	0	0.845	0	0	0	0.845
ENO3	PCK2	9606.ENSP00000324105	9606.ENSP00000216780	0	0	0	0	0	0	0.9	0.41	0.938
ENO3	HK2	9606.ENSP00000324105	9606.ENSP00000290573	0	0	0	0	0.065	0	0	0.442	0.456
EPC2	MYC	9606.ENSP00000258484	9606.ENSP00000479618	0	0	0	0	0	0.359	0	0.15	0.432
EPC2	ING2	9606.ENSP00000258484	9606.ENSP00000307183	0	0	0	0	0.08	0.261	0	0.257	0.45
ERCC6	MSH6	9606.ENSP00000348089	9606.ENSP00000234420	0	0	0	0	0.145	0.066	0	0.428	0.504
ERCC6	SMARCA2	9606.ENSP00000348089	9606.ENSP00000265773	0	0	0	0.594	0.108	0.298	0	0.69	0.526
ERCC6	PRKDC	9606.ENSP00000348089	9606.ENSP00000313420	0	0	0	0	0.064	0.152	0	0.335	0.426
ERCC6	XRCC2	9606.ENSP00000348089	9606.ENSP00000352271	0	0	0	0	0.052	0	0	0.407	0.414
ERCC6	TP53BP1	9606.ENSP00000348089	9606.ENSP00000371475	0	0	0	0	0.084	0.15	0	0.433	0.52
ERN1	STAT3	9606.ENSP00000401445	9606.ENSP00000264657	0	0	0	0	0	0.14	0	0.385	0.448
ERN1	SQSTM1	9606.ENSP00000401445	9606.ENSP00000374455	0	0	0	0	0.052	0.104	0	0.58	0.612
ERN1	HIF1A	9606.ENSP00000401445	9606.ENSP00000437955	0	0	0	0	0	0.07	0	0.398	0.416
ERN1	MYC	9606.ENSP00000401445	9606.ENSP00000479618	0	0	0	0	0.051	0.221	0	0.335	0.465
ERN1	TRAF6	9606.ENSP00000401445	9606.ENSP00000433623	0	0	0	0	0.062	0.345	0	0.437	0.624
EXOSC1	EXOSC7	9606.ENSP00000359939	9606.ENSP00000265564	0	0	0	0	0.383	0.999	0.9	0.983	0.999
EXOSC1	PRIM1	9606.ENSP00000359939	9606.ENSP00000350491	0.192	0	0	0	0.046	0	0	0.328	0.436
EXOSC1	EXOSC6	9606.ENSP00000359939	9606.ENSP00000398597	0	0	0	0	0.244	0.995	0.9	0.992	0.999
EXOSC6	EXOSC7	9606.ENSP00000398597	9606.ENSP00000265564	0.111	0	0	0	0.219	0.998	0.9	0.993	0.999
FDXR	GADD45A	9606.ENSP00000416515	9606.ENSP00000360025	0	0	0	0	0.063	0	0	0.51	0.521
FGFR1	MMP2	9606.ENSP00000393312	9606.ENSP00000219070	0	0	0	0	0.107	0.213	0	0.364	0.514
FGFR1	SOX9	9606.ENSP00000393312	9606.ENSP00000245479	0	0	0	0	0.066	0	0	0.486	0.499
FGFR1	PIK3R3	9606.ENSP00000393312	9606.ENSP00000262741	0	0	0	0	0	0.181	0.8	0.204	0.858
FGFR1	STAT3	9606.ENSP00000393312	9606.ENSP00000264657	0	0	0	0	0	0.323	0	0.651	0.754
FGFR1	FN1	9606.ENSP00000393312	9606.ENSP00000346839	0	0	0	0	0.098	0	0	0.85	0.859
FGFR1	TGFBR2	9606.ENSP00000393312	9606.ENSP00000351905	0	0	0	0.559	0	0.276	0	0.413	0.4
FGFR1	NRAS	9606.ENSP00000393312	9606.ENSP00000358548	0	0	0	0	0.065	0.317	0.9	0.508	0.964
FGFR1	RPS6KA3	9606.ENSP00000393312	9606.ENSP00000368884	0	0	0	0.563	0	0.282	0	0.643	0.479
FGFR1	JAK2	9606.ENSP00000393312	9606.ENSP00000371067	0	0	0	0.606	0	0.331	0	0.6	0.485
FGFR1	SNAI2	9606.ENSP00000393312	9606.ENSP00000380034	0	0	0	0	0.062	0	0	0.406	0.419
FGFR1	TRAF6	9606.ENSP00000393312	9606.ENSP00000433623	0	0	0	0	0.063	0.07	0	0.396	0.427
FGFR1	HIF1A	9606.ENSP00000393312	9606.ENSP00000437955	0	0	0	0	0	0	0	0.434	0.434
FGFR1	MYC	9606.ENSP00000393312	9606.ENSP00000479618	0	0	0	0	0.064	0	0	0.646	0.655
FGFR1	FGFR2	9606.ENSP00000393312	9606.ENSP00000410294	0	0	0	0.972	0	0.502	0.5	0.947	0.747
FGFR1	VEGFA	9606.ENSP00000393312	9606.ENSP00000478570	0	0	0	0	0.049	0.059	0.6	0.656	0.86
FGFR2	SOX9	9606.ENSP00000410294	9606.ENSP00000245479	0	0	0	0	0.07	0	0	0.551	0.565
FGFR2	PIK3R3	9606.ENSP00000410294	9606.ENSP00000262741	0	0	0	0	0	0.181	0.6	0.234	0.727
FGFR2	STAT3	9606.ENSP00000410294	9606.ENSP00000264657	0	0	0	0	0	0.323	0.9	0.543	0.966
FGFR2	FOS	9606.ENSP00000410294	9606.ENSP00000306245	0	0	0	0	0	0	0.9	0.306	0.927
FGFR2	FN1	9606.ENSP00000410294	9606.ENSP00000346839	0	0	0	0	0.062	0	0	0.426	0.439
FGFR2	STAT1	9606.ENSP00000410294	9606.ENSP00000354394	0	0	0	0	0	0.111	0.9	0.23	0.925
FGFR2	NRAS	9606.ENSP00000410294	9606.ENSP00000358548	0	0	0	0	0.065	0.317	0.9	0.441	0.959
FGFR2	JAK2	9606.ENSP00000410294	9606.ENSP00000371067	0	0	0	0.61	0	0.122	0.8	0.46	0.848
FGFR2	SETD2	9606.ENSP00000410294	9606.ENSP00000386759	0	0	0	0	0	0.273	0	0.283	0.456
FGFR2	MYC	9606.ENSP00000410294	9606.ENSP00000479618	0	0	0	0	0.064	0	0	0.508	0.519
FGFR2	TRAF6	9606.ENSP00000410294	9606.ENSP00000433623	0	0	0	0	0.049	0.07	0.6	0.095	0.636
FGFR2	VEGFA	9606.ENSP00000410294	9606.ENSP00000478570	0	0	0	0	0.063	0.059	0.6	0.556	0.822
FN1	MMP2	9606.ENSP00000346839	9606.ENSP00000219070	0	0	0	0.616	0.349	0.129	0	0.877	0.607
FN1	SPARC	9606.ENSP00000346839	9606.ENSP00000231061	0	0	0	0	0.28	0.213	0	0.724	0.831
FN1	SOX9	9606.ENSP00000346839	9606.ENSP00000245479	0	0	0	0	0.088	0.101	0	0.545	0.594
FN1	LAMC1	9606.ENSP00000346839	9606.ENSP00000258341	0	0	0	0	0.22	0	0	0.464	0.564
FN1	THBS1	9606.ENSP00000346839	9606.ENSP00000260356	0	0	0	0	0.17	0.684	0.72	0.985	0.998
FN1	STAT3	9606.ENSP00000346839	9606.ENSP00000264657	0	0	0	0	0.062	0	0	0.643	0.651
FN1	TNC	9606.ENSP00000346839	9606.ENSP00000265131	0	0	0	0.582	0.297	0.33	0	0.787	0.669
FN1	IGF1R	9606.ENSP00000346839	9606.ENSP00000268035	0	0	0	0	0	0.057	0.9	0.839	0.983
FN1	MMP10	9606.ENSP00000346839	9606.ENSP00000279441	0	0	0	0	0.061	0	0	0.645	0.653
FN1	SMAD6	9606.ENSP00000346839	9606.ENSP00000288840	0	0	0	0	0.107	0	0	0.425	0.465
FN1	VCAM1	9606.ENSP00000346839	9606.ENSP00000294728	0	0	0	0	0.098	0	0	0.951	0.954
FN1	FOS	9606.ENSP00000346839	9606.ENSP00000306245	0	0	0	0	0	0	0	0.53	0.53
FN1	SMAD3	9606.ENSP00000346839	9606.ENSP00000332973	0	0	0	0	0.065	0	0	0.76	0.766
FN1	PTK2	9606.ENSP00000346839	9606.ENSP00000341189	0	0	0	0	0.076	0	0.9	0.911	0.991
FN1	JAK2	9606.ENSP00000346839	9606.ENSP00000371067	0	0	0	0	0.062	0	0	0.459	0.47
FN1	STAT1	9606.ENSP00000346839	9606.ENSP00000354394	0	0	0	0	0.062	0	0	0.465	0.477
FN1	PRKCA	9606.ENSP00000346839	9606.ENSP00000408695	0	0	0	0	0	0	0	0.508	0.508
FN1	TGFBR2	9606.ENSP00000346839	9606.ENSP00000351905	0	0	0	0	0.096	0	0	0.569	0.594
FN1	TGFBR1	9606.ENSP00000346839	9606.ENSP00000364133	0	0	0	0	0	0	0	0.614	0.614
FN1	SERPINH1	9606.ENSP00000346839	9606.ENSP00000434412	0	0	0	0	0.231	0	0	0.558	0.645
FN1	MYC	9606.ENSP00000346839	9606.ENSP00000479618	0	0	0	0	0	0.122	0	0.664	0.692
FN1	NRAS	9606.ENSP00000346839	9606.ENSP00000358548	0	0	0	0	0	0	0.6	0.325	0.718
FN1	HIF1A	9606.ENSP00000346839	9606.ENSP00000437955	0	0	0	0	0.065	0.168	0	0.739	0.779
FN1	SNAI2	9606.ENSP00000346839	9606.ENSP00000380034	0	0	0	0	0.286	0	0	0.802	0.852
FN1	VEGFA	9606.ENSP00000346839	9606.ENSP00000478570	0	0	0	0	0.076	0.27	0	0.989	0.992
FOS	MMP2	9606.ENSP00000306245	9606.ENSP00000219070	0	0	0	0	0	0	0	0.522	0.522
FOS	SOX9	9606.ENSP00000306245	9606.ENSP00000245479	0	0	0	0	0	0.124	0	0.402	0.454
FOS	TPH1	9606.ENSP00000306245	9606.ENSP00000250018	0	0	0	0	0	0	0	0.501	0.501
FOS	HDAC4	9606.ENSP00000306245	9606.ENSP00000264606	0	0	0	0	0.062	0.164	0	0.427	0.511
FOS	STAT3	9606.ENSP00000306245	9606.ENSP00000264657	0	0	0	0	0	0.416	0.9	0.977	0.998
FOS	IGF1R	9606.ENSP00000306245	9606.ENSP00000268035	0	0	0	0	0	0.064	0	0.458	0.471
FOS	RUNX1	9606.ENSP00000306245	9606.ENSP00000300305	0	0	0	0	0	0.486	0	0.16	0.55
FOS	TLE1	9606.ENSP00000306245	9606.ENSP00000365682	0	0	0	0	0	0.345	0	0.142	0.414
FOS	HDAC9	9606.ENSP00000306245	9606.ENSP00000408617	0	0	0	0	0.062	0.164	0	0.334	0.432
FOS	NRAS	9606.ENSP00000306245	9606.ENSP00000358548	0	0	0	0	0	0.117	0	0.405	0.452
FOS	GADD45A	9606.ENSP00000306245	9606.ENSP00000360025	0	0	0	0	0.062	0	0	0.47	0.481
FOS	JAK2	9606.ENSP00000306245	9606.ENSP00000371067	0	0	0	0	0	0.064	0	0.509	0.52
FOS	RPS6KA3	9606.ENSP00000306245	9606.ENSP00000368884	0	0	0	0	0	0.056	0	0.56	0.567
FOS	VEGFA	9606.ENSP00000306245	9606.ENSP00000478570	0	0	0	0	0	0.273	0	0.602	0.698
FOS	TRAF6	9606.ENSP00000306245	9606.ENSP00000433623	0	0	0	0	0	0.244	0	0.626	0.705
FOS	PRKCA	9606.ENSP00000306245	9606.ENSP00000408695	0	0	0	0	0	0	0.8	0.505	0.896
FOS	PTK2	9606.ENSP00000306245	9606.ENSP00000341189	0	0	0	0	0	0	0.9	0.392	0.936
FOS	STAT1	9606.ENSP00000306245	9606.ENSP00000354394	0	0	0	0	0	0.741	0	0.782	0.941
FOS	SP1	9606.ENSP00000306245	9606.ENSP00000329357	0	0	0	0	0	0.062	0.9	0.501	0.949
FOS	HIF1A	9606.ENSP00000306245	9606.ENSP00000437955	0	0	0	0	0	0.405	0.9	0.558	0.971
FOS	MYC	9606.ENSP00000306245	9606.ENSP00000479618	0	0	0	0	0.065	0.129	0.9	0.861	0.987
FOS	SMAD3	9606.ENSP00000306245	9606.ENSP00000332973	0	0	0	0	0	0.497	0.9	0.826	0.99
GADD45A	STAT3	9606.ENSP00000360025	9606.ENSP00000264657	0	0	0	0	0.062	0.27	0	0.341	0.509
GADD45A	MYC	9606.ENSP00000360025	9606.ENSP00000479618	0	0	0	0	0.063	0	0	0.56	0.57
GATM	NOS2	9606.ENSP00000379895	9606.ENSP00000327251	0	0	0	0	0	0	0.9	0.19	0.915
GATM	SHMT2	9606.ENSP00000379895	9606.ENSP00000333667	0	0	0	0	0.052	0	0.9	0.274	0.925
GDA	XDH	9606.ENSP00000238018	9606.ENSP00000368727	0.167	0	0.225	0	0.09	0	0.9	0.561	0.969
GOT1	PCK2	9606.ENSP00000359539	9606.ENSP00000216780	0	0	0	0	0.062	0	0.8	0.262	0.849
GOT1	SHMT2	9606.ENSP00000359539	9606.ENSP00000333667	0	0	0	0	0.145	0	0	0.39	0.456
GOT1	OGDHL	9606.ENSP00000359539	9606.ENSP00000363216	0	0	0	0	0.097	0	0.8	0.431	0.888
H1FX	H2AFY2	9606.ENSP00000329662	9606.ENSP00000362352	0	0	0	0	0.062	0.176	0	0.528	0.603
H2AFY2	HDAC4	9606.ENSP00000362352	9606.ENSP00000264606	0	0	0	0	0	0.151	0.6	0.066	0.655
H2AFY2	HDAC9	9606.ENSP00000362352	9606.ENSP00000408617	0	0	0	0	0	0.151	0.6	0.07	0.656
H2AFY2	HDAC8	9606.ENSP00000362352	9606.ENSP00000362674	0	0	0	0	0.062	0.151	0.6	0.116	0.68
HDAC4	SOX9	9606.ENSP00000264606	9606.ENSP00000245479	0	0	0	0	0	0.106	0	0.386	0.428
HDAC4	SETD2	9606.ENSP00000264606	9606.ENSP00000386759	0.044	0	0	0	0.062	0.17	0	0.297	0.406
HDAC4	SP100	9606.ENSP00000264606	9606.ENSP00000343023	0	0	0	0	0.063	0.061	0	0.389	0.415
HDAC4	SMARCA2	9606.ENSP00000264606	9606.ENSP00000265773	0	0	0	0	0.063	0.163	0	0.318	0.418
HDAC4	STAT3	9606.ENSP00000264606	9606.ENSP00000264657	0	0	0	0	0.062	0.102	0	0.377	0.429
HDAC4	MYC	9606.ENSP00000264606	9606.ENSP00000479618	0	0	0	0	0	0.056	0	0.428	0.437
HDAC4	HDAC8	9606.ENSP00000264606	9606.ENSP00000362674	0	0	0	0.658	0.062	0.32	0	0.849	0.526
HDAC4	SP1	9606.ENSP00000264606	9606.ENSP00000329357	0	0	0	0	0	0.526	0	0.287	0.648
HDAC4	TP53BP1	9606.ENSP00000264606	9606.ENSP00000371475	0	0	0	0	0.065	0.288	0	0.714	0.793
HDAC4	SIRT3	9606.ENSP00000264606	9606.ENSP00000372191	0	0	0	0	0.053	0.183	0	0.757	0.795
HDAC4	STAT1	9606.ENSP00000264606	9606.ENSP00000354394	0	0	0	0	0.048	0.316	0	0.752	0.825
HDAC4	HIF1A	9606.ENSP00000264606	9606.ENSP00000437955	0	0	0	0	0	0.767	0	0.879	0.97
HDAC4	SMAD3	9606.ENSP00000264606	9606.ENSP00000332973	0	0	0	0	0.054	0.282	0	0.982	0.986
HDAC8	STAT3	9606.ENSP00000362674	9606.ENSP00000264657	0	0	0	0	0.048	0.316	0	0.705	0.791
HDAC8	SMARCA2	9606.ENSP00000362674	9606.ENSP00000265773	0	0	0	0	0.066	0.163	0	0.323	0.425
HDAC8	MYC	9606.ENSP00000362674	9606.ENSP00000479618	0	0	0	0	0	0.056	0	0.395	0.404
HDAC8	HDAC9	9606.ENSP00000362674	9606.ENSP00000408617	0	0	0.243	0.657	0.062	0.32	0	0.834	0.558
HDAC8	SETD2	9606.ENSP00000362674	9606.ENSP00000386759	0.044	0	0	0	0.083	0.262	0	0.685	0.769
HDAC8	SIRT3	9606.ENSP00000362674	9606.ENSP00000372191	0	0	0	0	0.064	0.183	0	0.742	0.785
HDAC9	SMARCA2	9606.ENSP00000408617	9606.ENSP00000265773	0	0	0	0	0.063	0.163	0	0.36	0.454
HDAC9	SIRT3	9606.ENSP00000408617	9606.ENSP00000372191	0	0	0	0	0.052	0.183	0	0.703	0.75
HDAC9	SETD2	9606.ENSP00000408617	9606.ENSP00000386759	0.044	0	0	0	0.062	0.17	0	0.358	0.459
HDAC9	MYC	9606.ENSP00000408617	9606.ENSP00000479618	0	0	0	0	0	0.056	0	0.502	0.51
HDAC9	HIF1A	9606.ENSP00000408617	9606.ENSP00000437955	0	0	0	0	0	0.067	0	0.848	0.853
HIF1A	PDK4	9606.ENSP00000437955	9606.ENSP00000005178	0	0	0	0	0	0	0	0.433	0.433
HIF1A	MMP2	9606.ENSP00000437955	9606.ENSP00000219070	0	0	0	0	0	0	0	0.754	0.754
HIF1A	SOX9	9606.ENSP00000437955	9606.ENSP00000245479	0	0	0	0	0	0.147	0	0.711	0.743
HIF1A	THBS1	9606.ENSP00000437955	9606.ENSP00000260356	0	0	0	0	0.084	0	0	0.571	0.59
HIF1A	USP22	9606.ENSP00000437955	9606.ENSP00000261497	0	0	0	0	0	0.27	0	0.227	0.412
HIF1A	STAT3	9606.ENSP00000437955	9606.ENSP00000264657	0	0	0	0	0.062	0.839	0.9	0.968	0.999
HIF1A	IGF1R	9606.ENSP00000437955	9606.ENSP00000268035	0	0	0	0	0	0.07	0	0.698	0.707
HIF1A	HK2	9606.ENSP00000437955	9606.ENSP00000290573	0	0	0	0	0	0	0	0.707	0.707
HIF1A	VCAM1	9606.ENSP00000437955	9606.ENSP00000294728	0	0	0	0	0.063	0	0	0.511	0.522
HIF1A	PRKDC	9606.ENSP00000437955	9606.ENSP00000313420	0	0	0	0	0	0.306	0	0.46	0.61
HIF1A	NOS2	9606.ENSP00000437955	9606.ENSP00000327251	0	0	0	0	0	0	0	0.519	0.519
HIF1A	SP1	9606.ENSP00000437955	9606.ENSP00000329357	0	0	0	0	0	0.819	0.9	0.746	0.995
HIF1A	SMAD3	9606.ENSP00000437955	9606.ENSP00000332973	0	0	0	0	0	0.772	0.9	0.977	0.999
HIF1A	PTK2	9606.ENSP00000437955	9606.ENSP00000341189	0	0	0	0	0	0	0	0.569	0.569
HIF1A	PDPK1	9606.ENSP00000437955	9606.ENSP00000344220	0	0	0	0	0	0	0	0.419	0.42
HIF1A	TGFBR2	9606.ENSP00000437955	9606.ENSP00000351905	0	0	0	0	0	0.07	0	0.4	0.418
HIF1A	STAT1	9606.ENSP00000437955	9606.ENSP00000354394	0	0	0	0	0.062	0.056	0	0.517	0.534
HIF1A	PRKAA2	9606.ENSP00000437955	9606.ENSP00000360290	0	0	0	0	0.055	0	0	0.449	0.457
HIF1A	TGFBR1	9606.ENSP00000437955	9606.ENSP00000364133	0	0	0	0	0.062	0.07	0	0.401	0.432
HIF1A	JAK2	9606.ENSP00000437955	9606.ENSP00000371067	0	0	0	0	0.064	0.07	0	0.519	0.544
HIF1A	SIRT3	9606.ENSP00000437955	9606.ENSP00000372191	0	0	0	0	0	0	0	0.616	0.616
HIF1A	SQSTM1	9606.ENSP00000437955	9606.ENSP00000374455	0	0	0	0	0	0.27	0	0.538	0.648
HIF1A	PDK1	9606.ENSP00000437955	9606.ENSP00000376352	0	0	0	0	0	0.273	0	0.741	0.804
HIF1A	SNAI2	9606.ENSP00000437955	9606.ENSP00000380034	0	0	0	0	0	0.15	0	0.614	0.658
HIF1A	PRKCA	9606.ENSP00000437955	9606.ENSP00000408695	0	0	0	0	0.062	0	0	0.402	0.415
HIF1A	TRAF6	9606.ENSP00000437955	9606.ENSP00000433623	0	0	0	0	0	0.486	0	0.479	0.721
HIF1A	SLC16A1	9606.ENSP00000437955	9606.ENSP00000441065	0	0	0	0	0	0	0	0.48	0.48
HIF1A	MYC	9606.ENSP00000437955	9606.ENSP00000479618	0	0	0	0	0	0.475	0.9	0.965	0.998
HIF1A	VEGFA	9606.ENSP00000437955	9606.ENSP00000478570	0	0	0	0	0.062	0.874	0.9	0.919	0.998
HIRA	MYC	9606.ENSP00000263208	9606.ENSP00000479618	0	0	0	0	0.065	0.398	0	0.074	0.433
HIRA	WHSC1	9606.ENSP00000263208	9606.ENSP00000372351	0	0	0	0	0.092	0.182	0	0.459	0.564
HIRA	SMARCA2	9606.ENSP00000263208	9606.ENSP00000265773	0	0	0	0	0.183	0.357	0	0.257	0.576
HIRA	HMGA1	9606.ENSP00000263208	9606.ENSP00000399888	0	0	0	0	0.069	0	0.6	0	0.611
HK2	PDK4	9606.ENSP00000290573	9606.ENSP00000005178	0	0	0	0	0	0	0	0.525	0.525
HK2	PRKAA2	9606.ENSP00000290573	9606.ENSP00000360290	0	0	0	0	0.062	0.244	0	0.247	0.42
HK2	SIRT3	9606.ENSP00000290573	9606.ENSP00000372191	0	0	0	0	0	0.076	0	0.405	0.427
HK2	VEGFA	9606.ENSP00000290573	9606.ENSP00000478570	0	0	0	0	0.076	0	0	0.417	0.438
HK2	MPC2	9606.ENSP00000290573	9606.ENSP00000356820	0	0	0	0	0.062	0	0	0.44	0.452
HK2	SLC16A1	9606.ENSP00000290573	9606.ENSP00000441065	0	0	0	0	0.076	0	0	0.452	0.472
HK2	MYC	9606.ENSP00000290573	9606.ENSP00000479618	0	0	0	0	0.124	0.066	0	0.597	0.642
HK2	PDK1	9606.ENSP00000290573	9606.ENSP00000376352	0	0	0	0	0.061	0	0	0.721	0.727
HMGA1	STAT3	9606.ENSP00000399888	9606.ENSP00000264657	0	0	0	0	0	0	0	0.644	0.644
HMGA1	SP1	9606.ENSP00000399888	9606.ENSP00000329357	0	0	0	0	0	0.486	0	0.209	0.576
IGF1R	MMP2	9606.ENSP00000268035	9606.ENSP00000219070	0	0	0	0	0	0	0	0.5	0.499
IGF1R	SOX9	9606.ENSP00000268035	9606.ENSP00000245479	0	0	0	0	0	0.061	0	0.397	0.409
IGF1R	PIK3R3	9606.ENSP00000268035	9606.ENSP00000262741	0	0	0	0	0	0.862	0.8	0.889	0.996
IGF1R	STAT3	9606.ENSP00000268035	9606.ENSP00000264657	0	0	0	0	0	0.707	0	0.766	0.929
IGF1R	STAT1	9606.ENSP00000268035	9606.ENSP00000354394	0	0	0	0	0	0.14	0	0.339	0.407
IGF1R	SNAI2	9606.ENSP00000268035	9606.ENSP00000380034	0	0	0	0	0.053	0.056	0	0.414	0.43
IGF1R	SMAD3	9606.ENSP00000268035	9606.ENSP00000332973	0	0	0	0	0.053	0.107	0	0.418	0.465
IGF1R	MYC	9606.ENSP00000268035	9606.ENSP00000479618	0	0	0	0	0.051	0.056	0	0.687	0.695
IGF1R	TRAF6	9606.ENSP00000268035	9606.ENSP00000433623	0	0	0	0	0.062	0.099	0.6	0.207	0.696
IGF1R	VEGFA	9606.ENSP00000268035	9606.ENSP00000478570	0	0	0	0	0	0	0.6	0.681	0.866
IGF1R	PTK2	9606.ENSP00000268035	9606.ENSP00000341189	0	0	0	0.61	0	0.298	0.8	0.627	0.888
IGF1R	NRAS	9606.ENSP00000268035	9606.ENSP00000358548	0	0	0	0	0	0.14	0.8	0.555	0.916
IGF1R	JAK2	9606.ENSP00000268035	9606.ENSP00000371067	0	0	0	0.564	0	0.471	0.8	0.905	0.933
JAK2	MMP2	9606.ENSP00000371067	9606.ENSP00000219070	0	0	0	0	0	0	0	0.465	0.465
JAK2	WDR77	9606.ENSP00000371067	9606.ENSP00000235090	0	0	0	0	0	0.071	0	0.529	0.545
JAK2	PIK3R3	9606.ENSP00000371067	9606.ENSP00000262741	0	0	0	0	0.062	0.102	0.8	0.228	0.852
JAK2	STAT3	9606.ENSP00000371067	9606.ENSP00000264657	0	0	0	0	0.053	0.884	0.9	0.995	0.999
JAK2	VCAM1	9606.ENSP00000371067	9606.ENSP00000294728	0	0	0	0	0.062	0	0	0.39	0.403
JAK2	NOS2	9606.ENSP00000371067	9606.ENSP00000327251	0	0	0	0	0	0.077	0.9	0.394	0.939
JAK2	SMAD3	9606.ENSP00000371067	9606.ENSP00000332973	0	0	0	0	0	0.107	0	0.37	0.414
JAK2	PTK2	9606.ENSP00000371067	9606.ENSP00000341189	0	0	0	0.575	0	0.505	0.9	0.472	0.958
JAK2	STAT1	9606.ENSP00000371067	9606.ENSP00000354394	0	0	0	0	0.096	0.887	0.9	0.978	0.999
JAK2	NRAS	9606.ENSP00000371067	9606.ENSP00000358548	0	0	0	0	0.062	0.14	0.9	0.617	0.965
JAK2	TRAF6	9606.ENSP00000371067	9606.ENSP00000433623	0	0	0	0	0.062	0.164	0	0.367	0.46
JAK2	SETD2	9606.ENSP00000371067	9606.ENSP00000386759	0	0	0	0	0	0.068	0	0.459	0.474
JAK2	VEGFA	9606.ENSP00000371067	9606.ENSP00000478570	0	0	0	0	0	0	0	0.605	0.605
JAK2	MYC	9606.ENSP00000371067	9606.ENSP00000479618	0	0	0	0	0.051	0.056	0	0.636	0.646
KMT2D	THBS1	9606.ENSP00000301067	9606.ENSP00000260356	0	0	0	0	0	0	0.9	0.052	0.901
KMT2D	RUNX1	9606.ENSP00000301067	9606.ENSP00000300305	0	0	0	0	0	0	0.6	0.134	0.638
KMT2D	TP53BP1	9606.ENSP00000301067	9606.ENSP00000371475	0	0	0	0	0.065	0.14	0	0.322	0.407
KMT2D	PRDM1	9606.ENSP00000301067	9606.ENSP00000358092	0	0	0	0	0.064	0	0	0.399	0.413
KMT2D	SETD2	9606.ENSP00000301067	9606.ENSP00000386759	0	0	0	0.539	0.168	0	0	0.679	0.423
KMT2D	ZMYM3	9606.ENSP00000301067	9606.ENSP00000322845	0	0	0	0	0.049	0	0	0.467	0.471
KMT2D	MYC	9606.ENSP00000301067	9606.ENSP00000479618	0	0	0	0	0.062	0	0	0.618	0.626
KMT2D	TLE1	9606.ENSP00000301067	9606.ENSP00000365682	0	0	0	0	0.061	0.056	0.65	0.141	0.698
KMT2D	PYGO2	9606.ENSP00000301067	9606.ENSP00000357442	0	0	0	0	0	0.27	0.6	0.26	0.765
KMT2D	MOV10	9606.ENSP00000301067	9606.ENSP00000399797	0	0	0	0	0.064	0.062	0.9	0.055	0.905
L3MBTL2	TP53BP1	9606.ENSP00000216237	9606.ENSP00000371475	0	0	0	0	0.104	0	0	0.391	0.431
L3MBTL2	PCGF5	9606.ENSP00000216237	9606.ENSP00000445704	0	0	0	0	0.063	0.152	0	0.344	0.433
L3MBTL2	PCGF1	9606.ENSP00000216237	9606.ENSP00000233630	0	0	0	0	0	0.152	0	0.55	0.602
LAMC1	THBS1	9606.ENSP00000258341	9606.ENSP00000260356	0	0	0	0	0.118	0.121	0	0.368	0.467
LAMC1	PTK2	9606.ENSP00000258341	9606.ENSP00000341189	0	0	0	0	0.09	0	0.9	0.277	0.928
MBD3	SMARCA2	9606.ENSP00000412302	9606.ENSP00000265773	0	0	0	0	0.049	0.354	0	0.121	0.413
MBD3	SNAI2	9606.ENSP00000412302	9606.ENSP00000380034	0	0	0	0	0	0.139	0.9	0.055	0.911
MBD3	MYC	9606.ENSP00000412302	9606.ENSP00000479618	0	0	0	0	0	0.316	0	0.183	0.417
MMP10	MMP2	9606.ENSP00000279441	9606.ENSP00000219070	0	0	0	0.874	0.071	0	0.65	0.748	0.692
MMP10	STAT3	9606.ENSP00000279441	9606.ENSP00000264657	0	0	0	0	0	0	0	0.416	0.416
MMP10	SP1	9606.ENSP00000279441	9606.ENSP00000329357	0	0	0	0	0	0	0	0.416	0.416
MMP10	VCAM1	9606.ENSP00000279441	9606.ENSP00000294728	0	0	0	0	0	0	0	0.438	0.438
MMP10	VEGFA	9606.ENSP00000279441	9606.ENSP00000478570	0	0	0	0	0	0	0	0.505	0.505
MMP2	TGFBR2	9606.ENSP00000219070	9606.ENSP00000351905	0	0	0	0	0.097	0	0	0.378	0.414
MMP2	TGFBR1	9606.ENSP00000219070	9606.ENSP00000364133	0	0	0	0	0	0	0	0.452	0.452
MMP2	SMAD3	9606.ENSP00000219070	9606.ENSP00000332973	0	0	0	0	0.062	0.057	0	0.556	0.572
MMP2	MYC	9606.ENSP00000219070	9606.ENSP00000479618	0	0	0	0	0	0	0	0.606	0.606
MMP2	VCAM1	9606.ENSP00000219070	9606.ENSP00000294728	0	0	0	0	0.109	0	0	0.602	0.63
MMP2	PTK2	9606.ENSP00000219070	9606.ENSP00000341189	0	0	0	0	0	0	0	0.636	0.636
MMP2	SP1	9606.ENSP00000219070	9606.ENSP00000329357	0	0	0	0	0	0.27	0	0.533	0.644
MMP2	SERPINH1	9606.ENSP00000219070	9606.ENSP00000434412	0	0	0	0	0.252	0.402	0	0.288	0.653
MMP2	SNAI2	9606.ENSP00000219070	9606.ENSP00000380034	0	0	0	0	0.232	0	0	0.653	0.723
MMP2	SPARC	9606.ENSP00000219070	9606.ENSP00000231061	0	0	0	0	0.878	0	0	0.55	0.943
MMP2	THBS1	9606.ENSP00000219070	9606.ENSP00000260356	0	0	0	0	0.157	0.27	0.8	0.691	0.956
MMP2	STAT3	9606.ENSP00000219070	9606.ENSP00000264657	0	0	0	0	0	0.273	0.9	0.683	0.975
MMP2	VEGFA	9606.ENSP00000219070	9606.ENSP00000478570	0	0	0	0	0.065	0	0.9	0.848	0.984
MOV10	RUNX1	9606.ENSP00000399797	9606.ENSP00000300305	0	0	0	0	0	0	0.9	0.075	0.903
MOV10	SP1	9606.ENSP00000399797	9606.ENSP00000329357	0	0	0	0	0.062	0.058	0.65	0	0.663
MOV10	MYC	9606.ENSP00000399797	9606.ENSP00000479618	0	0	0	0	0.063	0.066	0.9	0.453	0.945
MSH6	SP1	9606.ENSP00000234420	9606.ENSP00000329357	0	0	0	0	0.062	0.057	0	0.4	0.423
MSH6	MYC	9606.ENSP00000234420	9606.ENSP00000479618	0	0	0	0	0.062	0.128	0	0.426	0.489
MSH6	PARP2	9606.ENSP00000234420	9606.ENSP00000250416	0	0	0	0	0.174	0.135	0	0.433	0.56
MSH6	SETD2	9606.ENSP00000234420	9606.ENSP00000386759	0	0	0	0	0.069	0	0	0.569	0.583
MSH6	PRIM1	9606.ENSP00000234420	9606.ENSP00000350491	0	0	0	0	0.478	0.056	0	0.24	0.592
MSH6	XRCC2	9606.ENSP00000234420	9606.ENSP00000352271	0	0	0	0	0.105	0	0	0.568	0.597
MSH6	TGFBR2	9606.ENSP00000234420	9606.ENSP00000351905	0	0	0	0	0.049	0.056	0	0.606	0.615
MSH6	PRIM2	9606.ENSP00000234420	9606.ENSP00000484105	0	0	0	0	0.652	0	0	0.175	0.7
MSH6	TP53BP1	9606.ENSP00000234420	9606.ENSP00000371475	0	0	0	0	0.212	0	0.36	0.464	0.706
MSH6	TTK	9606.ENSP00000234420	9606.ENSP00000358813	0	0	0	0	0.679	0	0	0.123	0.707
MSH6	PRKDC	9606.ENSP00000234420	9606.ENSP00000313420	0	0	0	0	0.152	0.354	0.9	0.722	0.982
MYC	SOX9	9606.ENSP00000479618	9606.ENSP00000245479	0	0	0	0	0	0.057	0	0.608	0.614
MYC	THBS1	9606.ENSP00000479618	9606.ENSP00000260356	0	0	0	0	0.062	0	0	0.469	0.48
MYC	USP22	9606.ENSP00000479618	9606.ENSP00000261497	0	0	0	0	0.055	0.656	0	0.443	0.803
MYC	SLC7A5	9606.ENSP00000479618	9606.ENSP00000261622	0	0	0	0	0.105	0	0	0.458	0.494
MYC	PRDX1	9606.ENSP00000479618	9606.ENSP00000262746	0	0	0	0	0	0.291	0	0.948	0.962
MYC	STAT3	9606.ENSP00000479618	9606.ENSP00000264657	0	0	0	0	0	0.684	0.9	0.836	0.994
MYC	SMARCA2	9606.ENSP00000479618	9606.ENSP00000265773	0	0	0	0	0	0.298	0	0.587	0.698
MYC	TNKS	9606.ENSP00000479618	9606.ENSP00000311579	0	0	0	0	0	0.057	0	0.423	0.432
MYC	PRKDC	9606.ENSP00000479618	9606.ENSP00000313420	0	0	0	0	0.07	0.354	0	0.576	0.723
MYC	NOS2	9606.ENSP00000479618	9606.ENSP00000327251	0	0	0	0	0	0	0.9	0.254	0.922
MYC	SP1	9606.ENSP00000479618	9606.ENSP00000329357	0	0	0	0	0.062	0.837	0.9	0.972	0.999
MYC	SMAD3	9606.ENSP00000479618	9606.ENSP00000332973	0	0	0	0	0	0.281	0.9	0.937	0.995
MYC	SHMT2	9606.ENSP00000479618	9606.ENSP00000333667	0	0	0	0	0.112	0.066	0	0.337	0.402
MYC	PTK2	9606.ENSP00000479618	9606.ENSP00000341189	0	0	0	0	0	0.066	0	0.517	0.53
MYC	TGFBR2	9606.ENSP00000479618	9606.ENSP00000351905	0	0	0	0	0.062	0.078	0	0.517	0.545
MYC	STAT1	9606.ENSP00000479618	9606.ENSP00000354394	0	0	0	0	0	0.066	0	0.651	0.661
MYC	PRDM1	9606.ENSP00000479618	9606.ENSP00000358092	0	0	0	0	0	0	0	0.634	0.634
MYC	NRAS	9606.ENSP00000479618	9606.ENSP00000358548	0	0	0	0	0.061	0.058	0	0.642	0.656
MYC	TGFBR1	9606.ENSP00000479618	9606.ENSP00000364133	0	0	0	0	0.051	0.067	0	0.596	0.612
MYC	TLE1	9606.ENSP00000479618	9606.ENSP00000365682	0	0	0	0	0	0.105	0.9	0.335	0.935
MYC	PSAT1	9606.ENSP00000479618	9606.ENSP00000365773	0	0	0	0	0.083	0	0	0.391	0.418
MYC	RPS6KA3	9606.ENSP00000479618	9606.ENSP00000368884	0	0	0	0	0	0	0	0.472	0.472
MYC	TP53BP1	9606.ENSP00000479618	9606.ENSP00000371475	0	0	0	0	0	0.376	0	0.505	0.677
MYC	SIRT3	9606.ENSP00000479618	9606.ENSP00000372191	0	0	0	0	0	0.056	0	0.661	0.666
MYC	WHSC1	9606.ENSP00000479618	9606.ENSP00000372351	0	0	0	0	0.062	0	0	0.464	0.475
MYC	SQSTM1	9606.ENSP00000479618	9606.ENSP00000374455	0	0	0	0	0	0.155	0	0.421	0.49
MYC	PDK1	9606.ENSP00000479618	9606.ENSP00000376352	0	0	0	0	0	0.116	0	0.519	0.556
MYC	PSPH	9606.ENSP00000479618	9606.ENSP00000378854	0	0	0	0	0	0	0	0.46	0.46
MYC	SNAI2	9606.ENSP00000479618	9606.ENSP00000380034	0	0	0	0	0	0	0	0.671	0.671
MYC	SETD2	9606.ENSP00000479618	9606.ENSP00000386759	0	0	0	0	0.062	0	0	0.46	0.471
MYC	PRKCA	9606.ENSP00000479618	9606.ENSP00000408695	0	0	0	0	0	0.066	0	0.5	0.513
MYC	TRAF6	9606.ENSP00000479618	9606.ENSP00000433623	0	0	0	0	0	0	0	0.647	0.647
MYC	VEGFA	9606.ENSP00000479618	9606.ENSP00000478570	0	0	0	0	0	0	0	0.761	0.761
NADK	SHMT2	9606.ENSP00000367890	9606.ENSP00000333667	0.219	0	0	0	0	0	0	0.266	0.402
NADK	SIRT3	9606.ENSP00000367890	9606.ENSP00000372191	0.058	0	0	0	0.053	0	0	0.401	0.419
NOC2L	RRP8	9606.ENSP00000317992	9606.ENSP00000254605	0	0	0	0	0.837	0.283	0	0.06	0.88
NOC2L	PRMT2	9606.ENSP00000317992	9606.ENSP00000380759	0	0	0	0	0.505	0.062	0	0	0.515
NOS2	STAT3	9606.ENSP00000327251	9606.ENSP00000264657	0	0	0	0	0	0	0.9	0.519	0.949
NOS2	VCAM1	9606.ENSP00000327251	9606.ENSP00000294728	0	0	0	0	0	0	0	0.481	0.481
NOS2	PTGS1	9606.ENSP00000327251	9606.ENSP00000354612	0	0	0	0	0.048	0.142	0	0.343	0.416
NOS2	VEGFA	9606.ENSP00000327251	9606.ENSP00000478570	0	0	0	0	0.065	0	0	0.518	0.53
NOS2	SP1	9606.ENSP00000327251	9606.ENSP00000329357	0	0	0	0	0	0	0.9	0.09	0.905
NOS2	STAT1	9606.ENSP00000327251	9606.ENSP00000354394	0	0	0	0	0.062	0	0.9	0.607	0.959
NRAS	PIK3R3	9606.ENSP00000358548	9606.ENSP00000262741	0	0	0	0	0	0.132	0.8	0.156	0.84
NRAS	STAT3	9606.ENSP00000358548	9606.ENSP00000264657	0	0	0	0	0	0.057	0	0.468	0.477
NRAS	RUNX1	9606.ENSP00000358548	9606.ENSP00000300305	0	0	0	0	0	0.097	0	0.377	0.413
NRAS	PTK2	9606.ENSP00000358548	9606.ENSP00000341189	0	0	0	0	0.049	0	0.9	0.295	0.927
NRAS	PDPK1	9606.ENSP00000358548	9606.ENSP00000344220	0	0	0	0	0.062	0	0.6	0.208	0.676
NRAS	SLC3A2	9606.ENSP00000358548	9606.ENSP00000367123	0	0	0	0	0	0.411	0	0.081	0.435
NRAS	VEGFA	9606.ENSP00000358548	9606.ENSP00000478570	0	0	0	0	0	0	0	0.459	0.459
NRAS	TGFBR1	9606.ENSP00000358548	9606.ENSP00000364133	0	0	0	0	0.056	0.14	0	0.453	0.517
NRAS	RPS6KA3	9606.ENSP00000358548	9606.ENSP00000368884	0	0	0	0	0.055	0.143	0.6	0.409	0.782
NRAS	PRKCA	9606.ENSP00000358548	9606.ENSP00000408695	0	0	0	0	0.062	0	0.8	0.252	0.847
PARP12	PARP2	9606.ENSP00000263549	9606.ENSP00000250416	0	0	0	0	0	0	0	0.619	0.619
PARP12	STAT1	9606.ENSP00000263549	9606.ENSP00000354394	0	0	0	0	0.646	0	0	0.21	0.709
PARP2	SIRT3	9606.ENSP00000250416	9606.ENSP00000372191	0	0	0	0	0	0	0	0.473	0.473
PARP2	TP53BP1	9606.ENSP00000250416	9606.ENSP00000371475	0	0	0	0	0.094	0	0	0.51	0.537
PARP2	PRKDC	9606.ENSP00000250416	9606.ENSP00000313420	0	0	0	0	0.063	0	0	0.532	0.543
PARP2	TIPARP	9606.ENSP00000250416	9606.ENSP00000420612	0	0	0	0	0	0	0	0.627	0.627
PARP2	TNKS2	9606.ENSP00000250416	9606.ENSP00000360689	0	0	0	0	0.076	0	0	0.757	0.766
PARP2	TNKS	9606.ENSP00000250416	9606.ENSP00000311579	0	0	0	0	0.076	0	0	0.76	0.769
PCGF1	PCGF5	9606.ENSP00000233630	9606.ENSP00000445704	0	0	0	0.824	0	0.192	0.9	0.703	0.925
PCGF5	RUNX1	9606.ENSP00000445704	9606.ENSP00000300305	0	0	0	0	0	0.182	0.6	0	0.658
PCK2	PDK4	9606.ENSP00000216780	9606.ENSP00000005178	0	0	0	0	0.052	0	0	0.521	0.526
PCK2	PSAT1	9606.ENSP00000216780	9606.ENSP00000365773	0	0	0	0	0.22	0	0	0.374	0.491
PDK1	PDK4	9606.ENSP00000376352	9606.ENSP00000005178	0	0	0	0.968	0	0.605	0	0.422	0.61
PDK1	SIRT3	9606.ENSP00000376352	9606.ENSP00000372191	0.045	0	0	0	0.049	0.179	0	0.337	0.44
PDK1	VEGFA	9606.ENSP00000376352	9606.ENSP00000478570	0	0	0	0	0	0	0	0.459	0.459
PDK1	SLC16A1	9606.ENSP00000376352	9606.ENSP00000441065	0	0	0	0	0	0	0	0.465	0.465
PDPK1	PIK3R3	9606.ENSP00000344220	9606.ENSP00000262741	0	0	0	0	0.062	0	0.8	0.532	0.904
PDPK1	PRKCA	9606.ENSP00000344220	9606.ENSP00000408695	0	0	0	0.711	0	0	0.9	0.361	0.909
PDPK1	TRAF6	9606.ENSP00000344220	9606.ENSP00000433623	0	0	0	0	0	0	0.9	0.15	0.911
PDPK1	TGFBR2	9606.ENSP00000344220	9606.ENSP00000351905	0	0	0	0.552	0.053	0.145	0.9	0.125	0.915
PDPK1	TGFBR1	9606.ENSP00000344220	9606.ENSP00000364133	0	0	0	0	0.062	0.145	0.9	0.142	0.922
PDPK1	RPS6KA3	9606.ENSP00000344220	9606.ENSP00000368884	0	0	0	0.707	0.068	0.726	0.9	0.568	0.976
PIK3R3	STAT3	9606.ENSP00000262741	9606.ENSP00000264657	0	0	0	0	0	0.28	0	0.231	0.423
PIK3R3	TGFBR2	9606.ENSP00000262741	9606.ENSP00000351905	0	0	0	0	0	0.697	0	0.128	0.725
PIK3R3	PTK2	9606.ENSP00000262741	9606.ENSP00000341189	0	0	0	0	0.066	0.673	0.8	0.15	0.941
PRDM1	STAT3	9606.ENSP00000358092	9606.ENSP00000264657	0	0	0	0	0	0.27	0	0.643	0.729
PRDM1	STAT1	9606.ENSP00000358092	9606.ENSP00000354394	0	0	0	0	0	0	0	0.433	0.433
PRDM1	TLE1	9606.ENSP00000358092	9606.ENSP00000365682	0	0	0	0	0	0.27	0	0.529	0.641
PRDM5	WHSC1	9606.ENSP00000264808	9606.ENSP00000372351	0	0	0	0	0.052	0.188	0	0.285	0.402
PRDX1	TNKS	9606.ENSP00000262746	9606.ENSP00000311579	0	0	0	0	0.062	0.056	0	0.454	0.475
PRIM1	VRK1	9606.ENSP00000350491	9606.ENSP00000216639	0	0	0	0	0.55	0	0	0	0.55
PRIM1	TTK	9606.ENSP00000350491	9606.ENSP00000358813	0	0	0	0	0.799	0	0	0.12	0.816
PRIM1	PRIM2	9606.ENSP00000350491	9606.ENSP00000484105	0.295	0	0	0	0.882	0.995	0.8	0.988	0.999
PRKCA	STAT3	9606.ENSP00000408695	9606.ENSP00000264657	0	0	0	0	0	0	0	0.425	0.424
PRKCA	SP1	9606.ENSP00000408695	9606.ENSP00000329357	0	0	0	0	0	0	0	0.472	0.472
PRKCA	PTK2	9606.ENSP00000408695	9606.ENSP00000341189	0	0	0	0.552	0	0	0.8	0.417	0.835
PRKCA	STAT1	9606.ENSP00000408695	9606.ENSP00000354394	0	0	0	0	0	0	0	0.457	0.457
PRKCA	TGFBR1	9606.ENSP00000408695	9606.ENSP00000364133	0	0	0	0	0	0.061	0	0.451	0.463
PRKCA	TRAF6	9606.ENSP00000408695	9606.ENSP00000433623	0	0	0	0	0	0.146	0	0.355	0.426
PRKCA	VEGFA	9606.ENSP00000408695	9606.ENSP00000478570	0	0	0	0	0	0	0	0.518	0.518
PRKDC	VRK1	9606.ENSP00000313420	9606.ENSP00000216639	0	0	0	0	0.114	0.325	0	0.13	0.435
PRKDC	TNKS	9606.ENSP00000313420	9606.ENSP00000311579	0	0	0	0	0.062	0.133	0	0.347	0.423
PRKDC	XRCC2	9606.ENSP00000313420	9606.ENSP00000352271	0	0	0	0	0.07	0	0	0.542	0.556
PRKDC	WHSC1	9606.ENSP00000313420	9606.ENSP00000372351	0	0	0	0	0.108	0.101	0.65	0.21	0.748
PRKDC	TP53BP1	9606.ENSP00000313420	9606.ENSP00000371475	0	0	0	0	0.074	0.243	0.65	0.847	0.957
PRMT2	WDR77	9606.ENSP00000380759	9606.ENSP00000235090	0	0	0	0	0.062	0	0	0.413	0.425
PSAT1	SLC7A5	9606.ENSP00000365773	9606.ENSP00000261622	0	0	0	0	0.111	0.06	0	0.384	0.441
PSAT1	SHMT2	9606.ENSP00000365773	9606.ENSP00000333667	0.047	0	0	0	0.247	0.107	0	0.814	0.865
PSAT1	TLE1	9606.ENSP00000365773	9606.ENSP00000365682	0	0	0	0	0	0	0	0.658	0.658
PSAT1	SLC3A2	9606.ENSP00000365773	9606.ENSP00000367123	0	0	0	0	0.101	0	0	0.399	0.436
PSAT1	PSPH	9606.ENSP00000365773	9606.ENSP00000378854	0.295	0	0	0	0.229	0	0.9	0.945	0.996
PSPH	SHMT2	9606.ENSP00000378854	9606.ENSP00000333667	0.199	0	0	0	0.081	0.107	0.9	0.822	0.986
PSPH	SETD2	9606.ENSP00000378854	9606.ENSP00000386759	0	0	0	0	0	0.056	0	0.557	0.563
PTGS1	VEGFA	9606.ENSP00000354612	9606.ENSP00000478570	0	0	0	0	0.064	0	0	0.419	0.432
PTK2	THBS1	9606.ENSP00000341189	9606.ENSP00000260356	0	0	0	0	0	0	0.6	0.342	0.725
PTK2	STAT3	9606.ENSP00000341189	9606.ENSP00000264657	0	0	0	0	0	0.678	0	0.883	0.96
PTK2	TNC	9606.ENSP00000341189	9606.ENSP00000265131	0	0	0	0	0.062	0	0.6	0.283	0.707
PTK2	VCAM1	9606.ENSP00000341189	9606.ENSP00000294728	0	0	0	0	0.063	0	0.9	0.345	0.933
PTK2	SMAD3	9606.ENSP00000341189	9606.ENSP00000332973	0	0	0	0	0.062	0	0	0.39	0.403
PTK2	TRAF6	9606.ENSP00000341189	9606.ENSP00000433623	0	0	0	0	0.062	0	0	0.45	0.462
PTK2	SNAI2	9606.ENSP00000341189	9606.ENSP00000380034	0	0	0	0	0.066	0	0	0.474	0.488
PTK2	STAT1	9606.ENSP00000341189	9606.ENSP00000354394	0	0	0	0	0.054	0.731	0	0.421	0.839
PTK2	VEGFA	9606.ENSP00000341189	9606.ENSP00000478570	0	0	0	0	0	0	0.9	0.657	0.964
PTPN5	SMAD3	9606.ENSP00000351342	9606.ENSP00000332973	0	0	0	0	0	0.061	0.9	0	0.902
PYGO2	TLE1	9606.ENSP00000357442	9606.ENSP00000365682	0	0	0	0	0.062	0	0.9	0.256	0.924
RRP8	WHSC1	9606.ENSP00000254605	9606.ENSP00000372351	0	0	0	0	0.144	0.406	0	0	0.469
RUNX1	SOX9	9606.ENSP00000300305	9606.ENSP00000245479	0	0	0	0	0	0	0	0.454	0.454
RUNX1	THBS1	9606.ENSP00000300305	9606.ENSP00000260356	0	0	0	0	0.076	0	0.9	0	0.903
RUNX1	SMARCD3	9606.ENSP00000300305	9606.ENSP00000262188	0	0	0	0	0	0.159	0.6	0.041	0.649
RUNX1	SMARCA2	9606.ENSP00000300305	9606.ENSP00000265773	0	0	0	0	0	0.104	0.6	0.058	0.632
RUNX1	TLE1	9606.ENSP00000300305	9606.ENSP00000365682	0	0	0	0	0	0.678	0	0.25	0.748
RUNX1	SMAD3	9606.ENSP00000300305	9606.ENSP00000332973	0	0	0	0	0	0.505	0.9	0.729	0.985
SERPINH1	SPARC	9606.ENSP00000434412	9606.ENSP00000231061	0	0	0	0	0.564	0	0	0.425	0.739
SETD2	USP22	9606.ENSP00000386759	9606.ENSP00000261497	0	0	0	0	0.094	0.06	0	0.478	0.517
SETD2	SMARCA2	9606.ENSP00000386759	9606.ENSP00000265773	0	0	0	0	0.349	0.153	0	0.501	0.701
SETD2	TGFBR2	9606.ENSP00000386759	9606.ENSP00000351905	0	0	0	0	0	0.068	0	0.477	0.492
SETD2	TGFBR1	9606.ENSP00000386759	9606.ENSP00000364133	0	0	0	0	0	0.068	0	0.383	0.4
SETD2	TP53BP1	9606.ENSP00000386759	9606.ENSP00000371475	0	0	0	0	0.089	0.14	0	0.328	0.428
SETD2	WHSC1	9606.ENSP00000386759	9606.ENSP00000372351	0	0	0	0.574	0.112	0	0	0.785	0.405
SETD2	VEGFA	9606.ENSP00000386759	9606.ENSP00000478570	0	0	0	0	0	0	0	0.468	0.468
SIRT3	STAT3	9606.ENSP00000372191	9606.ENSP00000264657	0	0	0	0	0	0	0	0.551	0.551
SIRT3	TP53BP1	9606.ENSP00000372191	9606.ENSP00000371475	0	0	0	0	0	0.403	0	0.269	0.545
SIRT3	VEGFA	9606.ENSP00000372191	9606.ENSP00000478570	0	0	0	0	0	0	0	0.406	0.406
SLC16A1	SLC7A5	9606.ENSP00000441065	9606.ENSP00000261622	0	0	0	0	0.083	0	0	0.535	0.555
SLC3A2	SLC7A5	9606.ENSP00000367123	9606.ENSP00000261622	0	0	0	0	0.538	0.975	0.9	0.99	0.999
SMAD3	SOX9	9606.ENSP00000332973	9606.ENSP00000245479	0	0	0	0	0	0.292	0	0.747	0.813
SMAD3	THBS1	9606.ENSP00000332973	9606.ENSP00000260356	0	0	0	0	0	0	0	0.504	0.504
SMAD3	STAT3	9606.ENSP00000332973	9606.ENSP00000264657	0	0	0	0	0.066	0.27	0	0.915	0.937
SMAD3	SMAD6	9606.ENSP00000332973	9606.ENSP00000288840	0	0	0	0.698	0.066	0.155	0.8	0.746	0.866
SMAD3	SP1	9606.ENSP00000332973	9606.ENSP00000329357	0	0	0	0	0.062	0.877	0.9	0.93	0.999
SMAD3	STAT1	9606.ENSP00000332973	9606.ENSP00000354394	0	0	0	0	0.062	0	0	0.477	0.489
SMAD3	VEGFA	9606.ENSP00000332973	9606.ENSP00000478570	0	0	0	0	0	0	0	0.595	0.595
SMAD3	SNAI2	9606.ENSP00000332973	9606.ENSP00000380034	0	0	0	0	0.065	0.078	0	0.654	0.676
SMAD3	TRAF6	9606.ENSP00000332973	9606.ENSP00000433623	0	0	0	0	0.062	0	0	0.933	0.935
SMAD3	TGFBR2	9606.ENSP00000332973	9606.ENSP00000351905	0	0	0	0	0.096	0.267	0.9	0.864	0.989
SMAD3	TGFBR1	9606.ENSP00000332973	9606.ENSP00000364133	0	0	0	0	0.062	0.896	0.9	0.988	0.999
SMAD6	TRAF6	9606.ENSP00000288840	9606.ENSP00000433623	0	0	0	0	0	0	0	0.453	0.453
SMAD6	TGFBR2	9606.ENSP00000288840	9606.ENSP00000351905	0	0	0	0	0.081	0.107	0.9	0.612	0.963
SMAD6	TGFBR1	9606.ENSP00000288840	9606.ENSP00000364133	0	0	0	0	0	0.777	0.9	0.705	0.992
SMARCA2	WDR77	9606.ENSP00000265773	9606.ENSP00000235090	0	0	0	0	0.066	0.085	0.6	0.186	0.684
SMARCA2	SMARCD3	9606.ENSP00000265773	9606.ENSP00000262188	0	0	0	0	0.065	0.956	0.9	0.649	0.998
SMARCA2	TP53BP1	9606.ENSP00000265773	9606.ENSP00000371475	0	0	0	0	0.151	0.15	0	0.399	0.529
SMARCA2	SS18L1	9606.ENSP00000265773	9606.ENSP00000333012	0	0	0	0	0.062	0.295	0.36	0.33	0.678
SMARCD3	WDR77	9606.ENSP00000262188	9606.ENSP00000235090	0	0	0	0	0.118	0.076	0.6	0.043	0.646
SMARCD3	TP53BP1	9606.ENSP00000262188	9606.ENSP00000371475	0	0	0	0	0.063	0.405	0	0	0.418
SMARCD3	SS18L1	9606.ENSP00000262188	9606.ENSP00000333012	0	0	0	0	0.063	0.152	0.36	0.388	0.647
SNAI2	SOX9	9606.ENSP00000380034	9606.ENSP00000245479	0	0	0	0	0.098	0.061	0	0.827	0.841
SNAI2	STAT3	9606.ENSP00000380034	9606.ENSP00000264657	0	0	0	0	0	0	0	0.605	0.605
SNAI2	TGFBR2	9606.ENSP00000380034	9606.ENSP00000351905	0	0	0	0	0.076	0.056	0	0.47	0.497
SNAI2	TGFBR1	9606.ENSP00000380034	9606.ENSP00000364133	0	0	0	0	0	0.056	0	0.532	0.539
SNAI2	VEGFA	9606.ENSP00000380034	9606.ENSP00000478570	0	0	0	0	0.069	0	0	0.558	0.57
SOX9	SPARC	9606.ENSP00000245479	9606.ENSP00000231061	0	0	0	0	0.089	0	0	0.465	0.492
SOX9	TGFBR1	9606.ENSP00000245479	9606.ENSP00000364133	0	0	0	0	0	0.061	0	0.401	0.413
SOX9	TGFBR2	9606.ENSP00000245479	9606.ENSP00000351905	0	0	0	0	0	0.061	0	0.425	0.437
SOX9	STAT3	9606.ENSP00000245479	9606.ENSP00000264657	0	0	0	0	0	0.063	0	0.455	0.467
SOX9	VEGFA	9606.ENSP00000245479	9606.ENSP00000478570	0	0	0	0	0.065	0	0	0.52	0.532
SP1	STAT3	9606.ENSP00000329357	9606.ENSP00000264657	0	0	0	0	0.062	0.838	0	0.965	0.994
SP1	SS18L1	9606.ENSP00000329357	9606.ENSP00000333012	0	0	0	0	0	0.058	0	0.45	0.46
SP1	TLE1	9606.ENSP00000329357	9606.ENSP00000365682	0	0	0	0	0	0.637	0	0	0.637
SP1	VEGFA	9606.ENSP00000329357	9606.ENSP00000478570	0	0	0	0	0	0.27	0	0.56	0.665
SP1	STAT1	9606.ENSP00000329357	9606.ENSP00000354394	0	0	0	0	0.062	0.062	0	0.66	0.674
SP100	STAT1	9606.ENSP00000343023	9606.ENSP00000354394	0	0	0	0	0.197	0	0	0.321	0.432
SP100	TP53BP1	9606.ENSP00000343023	9606.ENSP00000371475	0	0	0	0	0.049	0.302	0	0.305	0.499
SPARC	VCAM1	9606.ENSP00000231061	9606.ENSP00000294728	0	0	0	0	0.147	0	0	0.536	0.588
SPARC	XDH	9606.ENSP00000231061	9606.ENSP00000368727	0	0	0	0	0	0.609	0	0.045	0.61
SPARC	THBS1	9606.ENSP00000231061	9606.ENSP00000260356	0	0	0	0	0.096	0.213	0	0.701	0.769
SPARC	VEGFA	9606.ENSP00000231061	9606.ENSP00000478570	0	0	0	0	0	0.486	0	0.632	0.803
SQSTM1	TRAF6	9606.ENSP00000374455	9606.ENSP00000433623	0	0	0	0	0	0.919	0.9	0.99	0.999
SS18L1	TNKS	9606.ENSP00000333012	9606.ENSP00000311579	0	0	0	0	0	0	0	0.419	0.419
STAT1	STAT3	9606.ENSP00000354394	9606.ENSP00000264657	0	0	0	0.948	0.062	0.882	0.9	0.989	0.988
STAT1	VCAM1	9606.ENSP00000354394	9606.ENSP00000294728	0	0	0	0	0.063	0	0	0.445	0.458
STAT1	TGFBR2	9606.ENSP00000354394	9606.ENSP00000351905	0	0	0	0	0.085	0.207	0	0.325	0.468
STAT1	VEGFA	9606.ENSP00000354394	9606.ENSP00000478570	0	0	0	0	0	0.056	0	0.645	0.65
STAT1	TRAF6	9606.ENSP00000354394	9606.ENSP00000433623	0	0	0	0	0	0	0	0.759	0.76
STAT3	THBS1	9606.ENSP00000264657	9606.ENSP00000260356	0	0	0	0	0.062	0	0	0.414	0.426
STAT3	TGFBR1	9606.ENSP00000264657	9606.ENSP00000364133	0	0	0	0	0	0.14	0	0.436	0.494
STAT3	VCAM1	9606.ENSP00000264657	9606.ENSP00000294728	0	0	0	0	0.062	0	0	0.535	0.545
STAT3	TGFBR2	9606.ENSP00000264657	9606.ENSP00000351905	0	0	0	0	0.062	0.14	0	0.554	0.609
STAT3	TRAF6	9606.ENSP00000264657	9606.ENSP00000433623	0	0	0	0	0	0.27	0	0.565	0.669
STAT3	VEGFA	9606.ENSP00000264657	9606.ENSP00000478570	0	0	0	0	0	0.509	0.9	0.813	0.99
TFIP11	TUFT1	9606.ENSP00000384421	9606.ENSP00000357842	0	0	0	0	0	0.27	0	0.935	0.951
TGFBR1	THBS1	9606.ENSP00000364133	9606.ENSP00000260356	0	0	0	0	0	0	0	0.467	0.467
TGFBR1	TGFBR2	9606.ENSP00000364133	9606.ENSP00000351905	0	0	0	0.791	0.062	0.977	0.9	0.99	0.998
TGFBR1	VEGFA	9606.ENSP00000364133	9606.ENSP00000478570	0	0	0	0	0	0	0	0.525	0.525
TGFBR1	TRAF6	9606.ENSP00000364133	9606.ENSP00000433623	0	0	0	0	0.062	0.767	0	0.988	0.997
TGFBR2	THBS1	9606.ENSP00000351905	9606.ENSP00000260356	0	0	0	0	0.107	0	0	0.466	0.504
TGFBR2	VEGFA	9606.ENSP00000351905	9606.ENSP00000478570	0	0	0	0	0.062	0	0	0.5	0.51
TGFBR2	TRAF6	9606.ENSP00000351905	9606.ENSP00000433623	0	0	0	0	0.062	0.517	0	0.268	0.639
THBS1	VEGFA	9606.ENSP00000260356	9606.ENSP00000478570	0	0	0	0	0	0.27	0	0.895	0.92
THBS1	VCAM1	9606.ENSP00000260356	9606.ENSP00000294728	0	0	0	0	0.062	0	0.9	0.459	0.944
TNKS	TNKS2	9606.ENSP00000311579	9606.ENSP00000360689	0	0	0	0.982	0.072	0.213	0.9	0.912	0.921
TP53BP1	VRK1	9606.ENSP00000371475	9606.ENSP00000216639	0	0	0	0	0.114	0.298	0	0.307	0.531
TP53BP1	XRCC2	9606.ENSP00000371475	9606.ENSP00000352271	0	0	0	0	0	0	0	0.428	0.428
TP53BP1	TTK	9606.ENSP00000371475	9606.ENSP00000358813	0	0	0	0	0.459	0	0	0.096	0.49
TP53BP1	WHSC1	9606.ENSP00000371475	9606.ENSP00000372351	0	0	0	0	0.131	0.14	0.6	0.753	0.916
TTK	VRK1	9606.ENSP00000358813	9606.ENSP00000216639	0	0	0	0	0.385	0.065	0	0.231	0.519
USP12	WDR77	9606.ENSP00000282344	9606.ENSP00000235090	0	0	0	0	0.062	0.374	0	0.127	0.442
VCAM1	VEGFA	9606.ENSP00000294728	9606.ENSP00000478570	0	0	0	0	0.062	0	0	0.756	0.761
