# Supplementary material for: Differential chondrogenic differentiation between iPSC derived from healthy and OA cartilage is associated with changes in epigenetic regulation and metabolic transcriptomic signatures
Source: eLife. 2023 Jan 30;12:e83138. doi: 10.7554/eLife.83138 (PMC9886280; doi:10.7554/eLife.83138)
Supplement: Figure 5—source data 2. [file elife-83138-fig5-data2.xlsx]

## Sheet: Sheet1
	Relative Fold Change
Metabolic gene	AC-iMSC	OA-iMSC	Biosynthesis and Anabolic Pathways	Nutrient Capture and Catabolic Pathways	Metabolic Pathways categry
CACNA1A	3.07729	0.976307	-	-
PRIM2	2.8677	0.95258	+	-
PRIM1	2.71437	0.953454	+	-
APOA1	2.68562	0.928932	+	-
TPH1	2.58233	0.934228	+	-
THBS1	2.53586	0.935976	-	-
PIK3R3	1.93809	1.08329	-	+	Autophagy
APOB	1.8929	0.908936	+	+
COX8A	1.8444	0.97979	+	-
AR	1.82844	0.898937	-	-
NPR2	1.82562	0.958697	+	-
OGDHL	1.79299	1.00119	+	-	Amino acid synthesis
MPC2	1.75854	0.966563	+	-
FDXR	1.75617	0.984269	-	-
ENO3	1.75057	1.09125	+	-	Glycolysis
AOX1	1.71018	1.05941	+	-	Amino acid synthesis
ALDOB	1.70074	1.02806	+	-	Glycolysis
CD180	1.69972	0.976805	-	-
SQSTM1	1.59962	0.942093	-	-
KMT2D	1.59913	1.00666	+	-	Amino acid synthesis
AKT1S1	1.58187	0.997207	-	+	Autophagy
COX5A	1.54511	0.978795	+	-
PRDX1	1.51388	0.955202	-	-
SDHB	1.50632	0.946463	+	-
ALDH2	1.45802	1.01661	+	+	Amino acid synthesis
PRDX5	1.44057	0.954328	-	-
MAP2K3	1.43928	0.96831	-	-
SOD1	1.43166	0.942967	-	-
NSD1	1.42888	1.08727	+	-	Amino acid synthesis
NDUFA12	1.4279	0.962193	+	-
PSMB3	1.41517	0.951706	+	-
GCLC	1.41361	0.994719	+	-	Amino acid synthesis
CTSA	1.4074	0.981283	-	+
ARF5	1.38564	0.99	-	+
GNG12	1.37224	0.973554	-	-
ASL	1.36278	1.07235	+	-	Amino acid synthesis
PFKL	1.36189	1	+	-	Glycolysis
GSK3B	0.743482	1.1103	+	-	mTOR
ACACA	0.743456	0.93245	+	-
HIF1A	0.739709	1.05045	-	+	Autophagy
SOS2	0.734927	0.8897	-	-	mTOR
ODC1	0.729832	0.980288	+	-	Amino acid synthesis
CAD	0.726392	1.05991	+	-	Amino acid synthesis
LAMC1	0.708895	0.969184	-	-
NRAS	0.708856	1.05742	-	+	Autophagy
NAGLU	0.703971	0.963067	-	+
GATM	0.701065	0.918934	+	-	Amino acid synthesis
GOT1	0.6534	1.00218	+	-	Amino acid synthesis
SHMT2	0.650784	0.888939	+	-	Amino acid synthesis
EEA1	0.649168	0.983274	-	+
ECHS1	0.647057	1.07682	+	+	Amino acid synthesis
STAT1	0.63573	0.940345	-	-
ERN1	0.631225	1.04149	-	+	Autophagy
PDPK1	0.627753	1.0823	-	+	Autophagy
PCK2	0.620421	0.993226	+	-	Glycolysis
CD276	0.617196	0.977302	-	-
PTGS1	0.615897	0.950832	-	-
PDK4	0.604749	0.95695	+	-
ASNS	0.603127	1.03403	+	-	Amino acid synthesis
TRAF6	0.591897	1.08429	-	+	Autophagy
PSPH	0.58916	1.09026	+	-	Amino acid synthesis
ME2	0.588085	0.967436	+	-
AK3	0.584438	0.93893	+	-
SLC3A2	0.578571	0.985762	-	+	Amio acid Transporter
HK2	0.568678	1.04199	+	-	Glycolysis
COL6A3	0.564834	0.978297	-	-
PDK1	0.53622	0.957823	+	-
VEGFA	0.490035	0.933354	-	-
ERCC6	0.484622	0.983771	-	-
SMAD3	0.479382	0.943841	+	+
ATF7	0.465581	1.013	-	-
COL6A1	0.436565	0.9778	-	-
MYC	0.432028	0.964815	+	-
DCK	0.401508	0.982278	+	+
DEPTOR	0.39934	1.03702	-	+	Autophagy
NOS2	0.352176	1.00716	+	-	Amino acid synthesis
SLC7A5	0.337433	0.988747	-	+	Amio acid Transporter
GDA	0.286801	0.984766	+	-
PRKAA2	0.258421	1.08379	+	+	Autophagy
PTPN5	0.203081	0.949084	-	-
ZNF610	0.185286	0.929858	-	-
PSAT1	0.150986	1.08678	+	-	Amino acid synthesis
BCL2	0.138298	1.00517	-	+	Autophagy
XRCC2	0.0801838	0.931606	-	-
CYP8B1	0.0372632	0.981781	+	-
