# Supplementary material for: Differential chondrogenic differentiation between iPSC derived from healthy and OA cartilage is associated with changes in epigenetic regulation and metabolic transcriptomic signatures
Source: eLife. 2023 Jan 30;12:e83138. doi: 10.7554/eLife.83138 (PMC9886280; doi:10.7554/eLife.83138)
Supplement: Figure 5—source data 3. [file elife-83138-fig5-data3.xlsx]

## Sheet: Sheet1
	Relative Fold Change
Epifactor gene	AC-iMSC (#7)	OA-iMSC (#2)	Epigenetic gene Function
HMGN3	1.59764	0.993226	Chromatin remodeling
USP12	0.701011	1.00965	Histone modification erase
ENY2	1.31789	0.997207	Histone modification erase cofactor
SUDS3	1.27653	1.00019	Histone modification erase cofactor
L3MBTL2	0.683864	0.93893	Histone modification read
ATF2	0.679987	1.07682	Histone modification write
FBL	1.2897	1.0823	Histone modification write
PRMT1	1.32294	0.985264	Histone modification write
UBE2E1	1.31329	1.00865	Histone modification write
VRK1	0.531705	1.01313	Histone modification write
PCGF1	1.65526	0.978795	Polycomb group (PcG) protein
PCGF5	0.711907	0.979293	Polycomb group (PcG) protein
EXOSC6	1.57735	1.05194	Scaffold protein
ANP32B	1.41564	1.01661
APEX1	1.46384	1.05941
ARID2	1.23841	1.07235
ARID4B	1.34074	1.03403
ARRB1	0.301584	1.05991
ATRX	1.52402	0.918934
BAZ1A	1.41924	0.994719
BAZ2B	1.49931	0.995216
BCOR	1.3731	1.00218
BPTF	1.36536	1.00666
BRD4	0.800318	1.00716
BRD8	1.27355	1.08727
BRDT	6.55235	0.980288
BRWD1	1.68621	1.00119
CBX1	0.659755	1.02657
CBX5	0.710156	1.03353
CREBBP	1.23907	1.08678
DNMT3A	1.55933	1.09026
DPF2	0.629587	0.888939
EHMT2	1.38049	0.985762
ELP3	0.368149	0.988747
EP300	0.768233	1.00517
EPC2	0.748181	1.03702
ERCC6	0.484622	1.04149
EXOSC1	0.700002	1.05045
EXOSC7	2.09601	1.05742
GADD45A	0.381978	1.08329
GADD45G	1.47333	1.08379
GTF3C4	0.574577	1.08429
H1FX	1.92052	1
H2AFY2	1.623	0.982776
HDAC3	1.30523	0.992728
HDAC4	0.455265	1.01213
HDAC8	1.55962	1.01263
HDAC9	0.0404941	1.02806
HIRA	1.87266	1.08976
HLCS	0.51014	1.09125
HMGA1	0.667224	1.04199
HR	0.21132	1
ING2	0.688317	0.99
JAK2	0.7467	0.987
KDM2A	0.834283	1.013
KDM5A	0.754016	1.1103
KIAA2026	0.69213	0.8897
KMT2C	1.40092	0.93245
KMT2D	1.59913	0.948929
MBD3	1.66959	0.928932
MOV10	1.5736	0.908936
MSH6	1.63036	0.898937
MTA3	1.49851	0.99
NCL	1.24652	0.987
NCOA2	0.754643	1.013
NFYC	1.4301	1.1103
NOC2L	0.621485	0.976307
NSD1	1.42888	0.976805
PARP12	0.597786	0.977302
PARP2	0.591197	0.9778
PBRM1	0.751553	0.978297
PHF20	0.763381	0.97979
PHRF1	1.79505	0.980786
PKM	1.14006	0.981283
PPM1G	1.21433	0.981781
PRDM1	0.0395807	0.982278
PRDM5	2.30944	0.983274
PRKAA2	0.258421	0.983771
PRKCA	0.628451	0.984269
PRKDC	1.51703	0.984766
PRMT2	0.640814	0.986259
PRMT9	1.56059	0.986757
PYGO2	0.677603	0.987254
RAI1	1.51609	0.987752
RBBP7	1.40178	0.98825
RPS6KA3	0.681932	0.989245
RRP8	0.286669	0.989742
SAP30L	1.47881	0.99024
SETD2	1.63034	0.990738
SFPQ	1.42329	0.991235
SIRT3	1.84381	0.991733
SKP1	1.27526	0.992231
SMARCA2	1.68414	0.993723
SMARCD2	1.36193	0.994221
SMARCD3	1.82883	0.995714
SNAI2	1.89684	0.996211
SND1	0.833232	0.996709
SP1	0.688113	0.997704
SP100	2.32046	0.998202
SPOP	0.795131	0.998699
SS18L1	3.11845	0.999197
STK4	0.541867	0.999695
TIPARP	0.669476	1.00069
TLE1	0.527656	1.00169
TNKS	0.587527	1.00268
TNKS2	0.637677	1.00318
TOP2B	1.36049	1.00368
TP53BP1	1.57831	1.00417
TRIM24	1.29259	1.00467
TRIM27	1.34917	1.00567
TRIM28	1.41897	1.00616
TRRAP	1.44434	1.00766
TTK	0.236941	1.00815
UBR7	0.63962	1.00915
USP15	0.752051	1.01014
USP22	0.623745	1.01064
USP7	1.17608	1.01114
VPS72	1.44889	1.01164
WDR77	0.645278	1.01363
WHSC1	0.644011	1.01413
YWHAZ	0.782041	1.01462
ZMYM2	1.2334	1.01512
ZMYM3	0.642752	1.01562
ZNF687	1.29086	1.01612
ZNHIT1	1.44642	1.01697
ZZZ3	0.800718	1.01759
