# Supplementary material for: Differential chondrogenic differentiation between iPSC derived from healthy and OA cartilage is associated with changes in epigenetic regulation and metabolic transcriptomic signatures
Source: eLife. 2023 Jan 30;12:e83138. doi: 10.7554/eLife.83138 (PMC9886280; doi:10.7554/eLife.83138)
Supplement: Figure 6—source data 1. [file elife-83138-fig6-data1.xlsx]

## Sheet: Sheet1
	Relative Fold Change
Metaboic gene	AC-iMSCs	OA-iMSCs
ATP6V1F	0.292092	0.976307
BIRC3	0.236865	0.95258
BUB1	0.188503	0.953454
BUB1B	0.20993	0.928932
CCNA2	0.0504259	0.934228
CCNB2	0.166022	0.935976
CD68	0.244047	1.08329
CDC20	0.180954	0.908936
COL6A1	0.241126	0.97979
COL6A3	0.118675	0.898937
COX4I1	0.171379	0.958697
COX5B	0.286068	1.00119
CPT1A	0.238134	0.966563
CTSD	0.332325	0.984269
CTSL	0.254258	1.09125
FANCI	0.127139	1.05941
FLT1	0.282182	1.02806
GPX4	0.321038	0.976805
HLA-E	0.221072	0.942093
IL4I1	0.0858908	1.00666
IL6	0.0260108	0.997207
KIF2C	0.118209	0.978795
LAMA4	0.264412	0.955202
LAMTOR2	0.146403	0.946463
LDHB	0.351815	1.01661
MAP1LC3B	0.267702	0.954328
MGST3	0.225833	0.96831
MYBL2	0.256344	0.942967
MYCN	0.29065	1.08727
NCAPH	0.281678	0.962193
NDUFA13	0.254065	0.951706
NDUFA4	0.265885	0.994719
NDUFB10	0.0992503	0.981283
NDUFB11	0.22545	0.99
NDUFB4	0.14975	0.973554
NDUFS8	0.0648713	1.07235
NQO1	0.201704	1
NT5E	0.321542	1.1103
PDGFB	0.126822	0.93245
PLK1	0.241387	1.05045
PNP	0.318303	0.8897
POLE	0.291427	0.980288
PRIM1	0.286571	1.05991
PSMC1	0.144087	0.969184
PTGES	0.0588218	1.05742
RAD51	0.314805	0.963067
RPL23	0.185549	0.918934
SHMT1	0.166677	1.00218
SLC16A3	0.262265	0.888939
SLC16A6	0.306062	0.983274
THBS2	0.191169	1.07682
TXN	0.120111	0.940345
TXN2	0.141165	1.04149
TYMP	0.0345073	1.0823
UBE2C	0.0797253	0.993226
UPP1	0.154733	0.977302
UQCR11	0.116978	0.950832
UQCRQ	0.102709	0.95695
ZNF675	0.267219	1.03403
