# Supplementary material for: Differential chondrogenic differentiation between iPSC derived from healthy and OA cartilage is associated with changes in epigenetic regulation and metabolic transcriptomic signatures
Source: eLife. 2023 Jan 30;12:e83138. doi: 10.7554/eLife.83138 (PMC9886280; doi:10.7554/eLife.83138)
Supplement: Figure 6—source data 2. [file elife-83138-fig6-data2.xlsx]

## Sheet: Sheet1
	Relative Fold Change
Epifactor gene	AC-iMSC	OA-iMSC
JDP2	1.41308	1.01661
RUVBL1	0.647532	1.05941
SS18L2	2.65872	1.07235
MYBBP1A	0.791635	1.03403
RUVBL2	1.31071	1.05991
TDG	1.28329	1.07682
ASF1B	0.191817	0.918934
EYA3	1.38263	0.994719
EYA4	1.51362	0.995216
GSE1	0.724387	1.00218
HDAC10	0.105276	1.00666
HDAC11	1.38432	1.00716
USP12	0.65764	1.08727
C17orf49	0.709804	0.980288
GATAD2B	1.43287	1.00119
L3MBTL2	0.605624	1.02657
MUM1	0.184677	1.03353
UIMC1	1.34795	1.08678
WDR5	0.333661	1.09026
ATF2	1.37065	0.888939
CHEK1	0.372095	0.985762
DAPK3	0.194784	0.988747
FBL	0.774419	0.997207
HAT1	0.754666	1.00517
NEK6	0.695144	1.03702
PBK	0.0965937	1.04149
PRMT6	0.589011	1.05045
PRR14	0.208537	1.05194
RNF2	1.56533	1.05742
TSSK6	0.0272503	1.0823
UBE2D3	1.45267	1.08329
UBE2E1	1.31733	1.08379
UBE2H	1.2419	1.08429
ATF7IP	0.711472	1
CDC73	1.44791	0.982776
EID1	0.237713	0.992728
HSPA1A	0.426256	1.01213
HSPA1B	1.78116	1.01263
MAX	1.54931	1.02806
WAC	1.31979	1.08976
WDR82	1.31963	1.09125
PCGF5	1.85665	1.04199
EXOSC6	0.310321	0.993226
2021-03-05	1.68825	1
ADNP	0.649736	0.99
AIRE	2.83098	0.987
ALKBH1	1.81646	1.013
APEX1	0.674771	1.1103
APOBEC3C	0.121299	0.8897
ARID4A	1.36061	0.93245
ARID4B	1.60983	0.948929
ARNTL	2.16399	0.93893
ARRB1	1.56072	0.928932
ASXL2	1.54511	0.908936
ATAT1	0.670878	0.898937
ATR	0.721322	0.99
ATRX	1.27953	0.987
AURKB	0.238196	1.013
BAZ1A	0.707748	1.1103
BCOR	0.790396	0.976307
BMI1	1.30979	0.976805
BRD4	1.49159	0.977302
BRPF1	1.41931	0.9778
BRWD1	1.40791	0.978297
BRWD3	1.43126	0.978795
BTD	0.549675	0.979293
BUB1	0.188503	0.97979
CBX2	2.69347	0.980786
CBX3	0.563849	0.981283
CBX4	1.6647	0.981781
CBX6	0.548146	0.982278
CDYL	1.56205	0.983274
CHD1	1.35545	0.983771
CHD1L	0.569618	0.984269
CHD4	0.590925	0.984766
CHD9	1.4474	0.985264
CHUK	1.35256	0.986259
CIT	0.354479	0.986757
CSNK2A1	1.27073	0.987254
CUL2	1.6569	0.987752
CUL3	1.33514	0.98825
DDB2	0.464497	0.989245
DDX21	0.738432	0.989742
DDX50	2.84243	0.99024
DNAJC1	1.58086	0.990738
DNMT1	0.304352	0.991235
DOT1L	1.29359	0.991733
DPF2	1.58212	0.992231
EXOSC8	0.656657	0.993723
EYA1	1.29938	0.994221
EZH1	1.39513	0.995714
FAM175A	1.65133	0.996211
FAM175B	1.36458	0.996709
FBRS	1.25356	0.997704
FMR1	0.775574	0.998202
FXR1	1.44436	0.998699
GADD45A	1.684	0.999197
GADD45B	0.0776809	0.999695
GAPDH	0.404001	1.00019
GATAD1	0.801892	1.00069
GDAP2	1.99078	1.00169
H1F0	0.717574	1.00268
H1FX	0.448645	1.00318
H2AFV	0.219551	1.00368
H2AFX	0.588454	1.00417
H2AFY2	0.5519	1.00467
HCFC2	1.75408	1.00567
HDAC1	0.773871	1.00616
HDAC4	1.6509	1.00766
HDAC5	1.51306	1.00815
HDAC9	0.300009	1.00865
HELLS	0.471064	1.00915
HLTF	1.48184	1.00965
HMG20B	0.392091	1.01014
HMGA2	0.557372	1.01064
HMGB1	0.737686	1.01114
HMGB3	0.402489	1.01164
HUWE1	1.33542	1.01313
ING2	1.51064	1.01363
ING3	1.56266	1.01413
INO80B	0.524228	1.01462
INO80D	1.41951	1.01512
INTS12	1.39549	1.01562
JADE1	0.733135	1.01612
JMJD6	1.48832	1.01711
KANSL3	1.57413	1.01761
KAT2A	0.584803	1.01811
KAT6B	1.35235	1.0186
KAT7	1.42357	1.0191
KAT8	1.31901	1.0196
KDM3A	1.61789	1.0201
KDM3B	1.29584	1.02059
KDM4A	1.57092	1.02109
KDM4B	2.04283	1.02159
KDM4C	1.68755	1.02209
KDM4E	2.74802	1.02258
KDM5A	1.65856	1.02308
KDM5B	1.69541	1.02358
KDM5C	1.38043	1.02408
KDM6A	1.9862	1.02458
KMT2A	1.48706	1.02507
KMT2C	1.49389	1.02557
KMT2E	1.33473	1.02607
LEO1	0.757374	1.02706
MASTL	0.4117	1.02756
MBD2	1.26464	1.02856
MBD3	1.27512	1.02905
MBD4	0.440817	1.02955
MCRS1	0.740917	1.03005
MLLT1	0.704062	1.03055
MORF4L1	1.54048	1.03104
MORF4L2	1.51431	1.03154
MOV10	0.358601	1.03204
MSL3	1.49899	1.03254
MTA1	1.34188	1.03303
MYO1C	0.807192	1.03453
NAA60	1.69131	1.03502
NASP	0.599709	1.03552
NCOA6	1.35231	1.03602
NCOR1	1.68918	1.03652
NFYB	1.58037	1.03751
NFYC	1.34647	1.03801
NIPBL	1.2889	1.03851
NSD1	0.721727	1.03901
PARP12	0.379123	1.0395
PARP6	1.86916	1.04
PARP8	1.59482	1.0405
PARP9	0.572769	1.041
PHF1	1.34761	1.04249
PHF10	1.70847	1.04299
PHF6	1.27789	1.04348
POGZ	1.33142	1.04398
POLR1B	0.406203	1.04448
PPP2CA	1.32186	1.04498
PPP4R2	1.28345	1.04547
PRDM1	0.538414	1.04597
PRDM4	1.55157	1.04647
PRKAA1	0.7596	1.04697
PRKAB1	1.72821	1.04747
PRKAB2	1.46175	1.04796
PRKAG1	1.34165	1.04846
PRKAG2	0.700698	1.04896
PRKCA	1.4734	1.04946
PRKCB	1.85396	1.04995
PRMT7	0.682009	1.05095
PRPF31	0.593176	1.05145
RAD51	0.314805	1.05244
RAD54L	0.0663587	1.05294
RAI1	0.696745	1.05344
RB1	1.48769	1.05393
RBBP4	1.29579	1.05443
RBBP5	1.44051	1.05493
RBX1	0.768338	1.05543
RCOR1	1.4405	1.05592
RCOR3	1.45079	1.05642
RLIM	1.40798	1.05692
RNF20	1.66403	1.05791
RPS6KA3	1.48451	1.05841
RSF1	1.34603	1.05891
RYBP	1.79087	1.0604
SAP130	1.6018	1.0609
SAP30	1.39274	1.0614
SCMH1	0.729774	1.0619
SETD2	1.45211	1.06239
SETD3	1.64062	1.06289
SETD5	1.44166	1.06339
SETD6	0.744548	1.06389
SETD7	0.725214	1.06438
SF3B1	1.36035	1.06488
SFMBT2	2.2416	1.06538
SFPQ	0.794758	1.06588
SIN3A	1.48119	1.06637
SMARCA2	1.58358	1.06687
SMARCA4	0.76135	1.06737
SMARCA5	1.30657	1.06787
SMNDC1	1.54819	1.06836
SMYD4	0.456794	1.06886
SMYD5	1.37377	1.06936
SNAI2	2.01474	1.06986
SND1	1.67618	1.07036
SP1	1.44285	1.07085
SPOP	1.29939	1.07135
SRSF1	0.770302	1.07185
SUPT6H	1.47617	1.07284
SUV39H1	0.319339	1.07334
TAF1	1.44855	1.07384
TAF15	1.59411	1.07434
TAF6	0.397723	1.07483
TAF9	1.70559	1.07533
TBL1X	1.46394	1.07583
TBL1Y	1.44911	1.07633
TDRKH	0.594363	1.07732
TEX10	1.38127	1.07782
TIPARP	1.63637	1.07832
TLE1	1.33517	1.07881
TLK2	1.29908	1.07931
TNKS	1.34572	1.07981
TOP2A	0.308781	1.08031
TRIM27	1.52524	1.08081
TRIM33	1.64638	1.0813
TRIM66	0.361196	1.0818
TTK	0.0938032	1.0828
UBN1	1.35437	1.08479
UBR2	1.54602	1.08528
UBR5	1.35666	1.08578
UHRF2	1.41791	1.08628
USP22	1.87498	1.08777
USP3	1.64243	1.08827
USP36	1.64291	1.08877
USP49	1.40548	1.08926
WDR77	0.645846	1.09076
WHSC1L1	1.42603	1.09175
WSB2	0.496551	1.09225
YEATS2	0.577578	1.09275
YWHAB	1.25921	1.09325
ZMYM2	1.37999	1.09374
ZMYM3	0.716365	1.09424
ZNF217	0.501724	1.09474
ZNF516	1.46722	1.09524
