# Supplementary material for: Differential chondrogenic differentiation between iPSC derived from healthy and OA cartilage is associated with changes in epigenetic regulation and metabolic transcriptomic signatures
Source: eLife. 2023 Jan 30;12:e83138. doi: 10.7554/eLife.83138 (PMC9886280; doi:10.7554/eLife.83138)
Supplement: Figure 7—source data 1. [file elife-83138-fig7-data1.xlsx]

## Sheet: Sheet1
	RPKM
Gene	Healthy Cartilage			OA Cartilage			GeneFunction
CDK3	11	7	0	0	0	0	Histone modification write
TNP1	0	2	0	0	0	0	Chromatin remodeling
BAHD1	40	60	57	2	3	0	Chromatin remodeling
PAGR1	80	149	104	13	0	2	Histone modification write cofactor
MBD6	277	376	278	29	19	4	Chromatin remodeling
CBX7	236	268	450	40	15	7	Histone modification read
HMGN4	60	107	67	16	0	0	Chromatin remodeling
NAP1L4	179	335	392	34	14	14	Histone modification cofactor
UBE2H	317	365	381	33	25	22	Histone modification write
TSSK6	3	5	31	2	1	0	Histone modification write
WDR5	46	131	135	10	3	13	Histone modification read
DAPK3	36	103	62	8	9	0	Histone modification write
BRE	171	185	150	15	7	22	Histone modification write cofactor
MAPKAPK3	27	56	66	5	8	1	Chromatin remodeling
PRR14	109	292	129	34	9	8	Histone modification write
HDAC11	65	111	98	5	10	16	Histone modification erase
MEN1	36	60	44	6	9	1	Histone modification write cofactor
FBL	346	542	206	94	12	26	Histone modification write
SUZ12	213	474	248	64	36	13	Histone modification write cofactor
CDK2	72	155	109	22	21	0	Histone modification write
MECP2	500	963	835	134	91	71	Histone modification write cofactor
HDGF	223	712	543	103	56	36	Chromatin remodeling
GSE1	291	324	566	77	35	47	Histone modification erase
SIRT6	15	33	25	7	3	0	Histone modification erase
HMG20A	167	296	176	40	25	23	Chromatin remodeling cofactor
INO80E	42	74	143	8	23	6	Chromatin remodeling cofactor
CDK9	104	138	97	24	6	20	Histone modification cofactor
UBE2E1	213	335	298	84	15	30	Histone modification write
DMAP1	118	258	171	40	32	15	Chromatin remodeling
UBE2A	43	130	83	9	22	10	Histone modification write
HMGN2	690	1085	534	226	73	76	Chromatin remodeling
KDM8	8	26	27	1	6	3	Histone modification erase
UIMC1	152	450	147	57	33	33	Histone modification read
USP21	43	103	38	27	2	2	Histone modification erase
ACTR5	12	40	5	0	7	3	Chromatin remodeling
MAX	214	665	316	81	59	70	Histone modification write cofactor
ATN1	1466	2571	2202	736	169	241	Histone modification erase cofactor
WAC	1717	2449	1319	486	198	336	Histone modification write cofactor
HSPA1B	181	714	586	106	82	96	Histone modification write cofactor
MYBBP1A	70	258	187	51	20	30	Chromatin remodeling cofactor
GTF2I	476	2228	983	275	268	184	TF
ELP6	26	74	51	10	14	6	Histone modification write cofactor
DPPA3	0	4	1	0	1	0	Histone modification read
WDR82	106	229	193	42	33	35	Histone modification write cofactor
BABAM1	48	194	91	40	24	6	Histone modification erase cofactor
PCGF5	351	435	157	89	43	67	Polycomb group (PcG) protein
UCHL5	233	442	198	79	68	41	Histone modification erase cofactor
BRMS1	55	190	84	31	20	20	Chromatin remodeling
CDC73	456	895	329	150	108	111	Histone modification write cofactor
SS18L2	47	93	23	14	9	13	Chromatin remodeling
CDK17	230	265	201	67	47	41	Histone modification write
ATF2	833	1249	681	343	140	146	Histone modification write
ELP2	722	769	448	215	111	130	Histone modification write cofactor
MUM1	99	229	247	67	42	27	Histone modification read
CDK5	2	25	11	3	3	3	Histone modification write
ELP5	24	53	39	13	13	2	Histone modification write cofactor
ACTL6A	50	116	41	19	19	12	Chromatin remodeling cofactor
USP12	101	182	101	38	27	28	Histone modification erase
JDP2	164	417	461	85	88	80	Chromatin remodeling
HDAC10	12	21	44	5	7	7	Histone modification erase
RUVBL2	198	378	164	79	53	51	Chromatin remodeling cofactor
NEK6	29	197	192	19	55	35	Histone modification write
AURKC	18	4	12	6	3	0	Histone modification write
SIRT7	43	52	37	22	9	4	Histone modification erase
RCC1	38	128	40	19	22	14	Chromatin remodeling
GATAD2A	180	629	451	140	100	102	Histone modification read
TADA1	33	56	21	17	11	2	Histone chaperone
HSPA1A	105	482	179	112	60	39	Histone modification write cofactor
PHF12	205	747	381	171	115	89	Histone modification erase cofactor
PRMT6	3	23	20	9	4	0	Histone modification write
BRD3	72	380	373	94	69	73	Histone modification read
HMGN1	69	284	176	61	46	51	Chromatin remodeling
CHRAC1	68	190	103	37	24	49	Histone chaperone
PCGF2	76	146	118	66	16	22	Polycomb group (PcG) protein
PRMT1	153	546	156	104	60	98	Histone modification write
ATF7IP	207	833	607	226	128	151	Histone modification write cofactor
GATAD2B	346	888	561	241	124	207	Histone modification read
BANP	60	92	60	34	31	3	Histone modification write
YEATS4	36	60	16	18	6	12	Histone modification write cofactor
BRMS1L	25	56	34	10	14	13	Histone modification erase
ACTR8	77	171	71	43	27	35	Histone modification read
RUVBL1	20	85	48	9	29	15	Chromatin remodeling
SUPT3H	58	58	38	18	20	16	Histone modification write cofactor
L3MBTL2	55	327	124	86	43	49	Histone modification read
SIRT2	96	136	112	32	70	22	Histone modification erase
EXOSC2	124	183	162	56	59	56	Scaffold protein
PCGF1	30	57	27	10	15	17	Polycomb group (PcG) protein
PRDM11	54	178	84	44	48	27	Histone modification write
NAP1L2	14	57	48	26	9	11	Histone modification cofactor
UBE2B	2208	2510	680	862	575	663	Histone modification write
PCGF6	6	73	33	7	22	15	Polycomb group (PcG) protein
SUDS3	147	295	142	91	72	67	Histone modification erase cofactor
PCGF3	470	709	534	278	136	280	Polycomb group (PcG) protein
FOXP3	8	9	14	6	6	1	TF
HIRIP3	118	443	164	154	57	97	Histone modification read
VRK1	17	46	26	12	21	5	Histone modification write
MRGBP	87	234	176	80	64	85	Histone modification write cofactor
SET	647	2007	970	736	459	506	Histone modification
UBE2D3	1478	1955	929	723	503	846	Histone modification write
TDG	46	100	81	37	35	36	DNA modification
EID2B	16	28	19	8	7	15	Histone modification erase cofactor
EXOSC3	46	151	55	32	39	49	Scaffold protein
PRDM8	16	31	18	11	14	6	Histone modification write
EID1	1170	4672	1595	1296	713	1579	Histone modification write cofactor
MINA	135	421	109	90	101	131	Histone modification erase
HAT1	73	109	92	61	47	25	Histone modification write
CHEK1	40	74	61	27	46	12	Histone modification write
UBE2T	2	1	1	0	2	0	Histone modification write
ACTR6	78	82	19	48	29	15	Chromatin remodeling cofactor
TYW5	80	166	68	45	50	68	RNA modification
HMGN5	92	561	283	202	123	166	Chromatin remodeling
ACTL6B	1	3	18	2	5	5	Chromatin remodeling cofactor
ENY2	226	453	183	166	178	155	Histone modification erase cofactor
HMGN3	70	451	201	195	103	135	Chromatin remodeling
NAP1L1	2100	3441	1521	1392	1005	2056	Histone chaperone
EXOSC6	148	523	288	239	183	212	Scaffold protein
UBE2N	195	596	214	340	142	219	Histone modification write
C17orf49	75	344	106	170	76	123	Histone modification read
TADA3	152	433	182	173	135	234	Histone modification write cofactor
RNF2	43	198	58	81	46	86	Histone modification write
INO80C	125	359	272	165	304	103	Chromatin remodeling cofactor
ASF1A	26	91	12	38	25	36	Histone chaperone
YAF2	89	254	187	147	160	139	Chromatin remodeling cofactor
UBE2D1	27	64	21	32	37	32	Histone modification write
ELP4	41	88	31	37	51	58	Histone modification write cofactor
ASF1B	1	5	8	1	12	0	Histone chaperone
AICDA	7	28	16	17	14	17	DNA modification
NPM2	1	2	2	1	4	0	Histone chaperone
USP46	63	218	108	107	154	131	Histone modification erase
ACTR3B	18	72	44	41	54	51	Chromatin remodeling
MEAF6	94	408	75	259	143	237	Histone modification write cofactor
PRMT8	7	8	12	13	15	4	Histone modification write
E2F6	18	52	30	44	37	51	TF
EYA2	1	0	7	3	9	0	Histone modification erase
CBX8	1	9	7	13	13	1	Histone modification read
EYA3	192	269	426	558	471	443	Histone modification erase
EYA4	5	0	3	7	29	17	Histone modification erase
IKZF1	0	3	4	11	30	6	Chromatin remodeling
