# Supplementary material for: Differential chondrogenic differentiation between iPSC derived from healthy and OA cartilage is associated with changes in epigenetic regulation and metabolic transcriptomic signatures
Source: eLife. 2023 Jan 30;12:e83138. doi: 10.7554/eLife.83138 (PMC9886280; doi:10.7554/eLife.83138)
Supplement: Figure 7—source data 2. [file elife-83138-fig7-data2.xlsx]

## Sheet: Sheet1
	RPKM
Gene	Healthy Cartilage			OA Cartilage
COX8A	29	55	30	1	0	0
ENO1	2227	3126	3712	77	26	26
ARF5	28	65	45	1	1	0
VEGFA	7705	13034	28492	220	244	388
PDK4	982	191	537	15	11	5
HK2	524	640	1236	28	9	15
SLC7A5	37	200	306	7	2	4
PRDX5	157	287	126	10	2	3
NPR2	42	103	135	3	5	1
RELA	1064	1027	1294	92	28	22
NAGLU	48	135	93	9	5	0
SLC3A2	679	249	211	21	30	8
PFKL	300	623	723	31	33	23
PHGDH	171	85	157	5	11	6
RPLP0	782	2202	775	163	37	8
PKM	1452	7372	4389	545	89	133
ALDOA	2875	4472	3238	369	143	158
SHMT2	2448	1515	1167	137	48	140
ASNS	173	85	104	11	9	3
STAT3	816	2096	1636	113	69	115
ATF4	1300	3234	1275	274	54	54
ATF7	368	571	476	50	22	23
IMPDH1	95	177	168	15	10	5
PSMB3	28	294	28	16	2	6
GPX1	136	299	114	32	0	7
THBS1	2530	14245	8317	663	444	735
SREBF2	132	387	401	46	16	13
SLC25A1	54	119	71	12	6	3
AKT1S1	91	277	215	24	18	9
NCOA2	321	657	443	68	25	34
PTGS1	226	440	375	63	14	25
MYC	40	112	99	14	5	6
IMPDH2	262	459	237	64	29	14
SMAD3	194	384	670	74	41	29
KMT2D	246	776	641	72	67	54
PDK1	1798	2158	2099	347	152	227
NOS2	76	29	95	8	16	0
PGD	23	117	33	7	9	5
NSD1	123	546	417	63	45	25
ERN1	443	220	160	39	48	21
NFAT5	1321	3287	1805	432	226	203
PCK2	92	144	145	18	22	12
HIF1A	1669	9506	5001	1300	322	603
RUNX1	382	2408	1655	211	216	239
MAP2K3	9	97	72	14	7	6
AOX1	159	199	118	40	15	20
TKT	150	332	235	48	33	42
ECHS1	58	110	27	5	16	13
COL6A1	1063	6346	4914	1016	489	645
ASL	227	480	189	93	31	34
RANBP2	835	2080	704	334	132	176
ARID2	349	761	451	119	86	76
ERCC6	161	355	222	45	58	32
PRKAA2	170	140	95	22	35	18
NADK	77	252	130	35	35	15
COL6A3	1294	4480	9294	972	996	931
NME2	790	3302	864	520	172	262
CD276	41	137	124	22	24	13
LAMC1	161	1179	672	178	99	134
ACACA	44	231	212	45	38	17
EEA1	264	944	391	177	95	61
CTSA	45	346	298	68	41	38
TECR	119	243	167	45	52	16
SOS2	142	186	172	47	35	26
NEDD8	230	721	301	167	53	52
GMPS	172	496	257	83	68	51
PDPK1	143	274	165	53	56	24
COX6B1	235	794	168	170	26	78
PSPH	43	195	40	37	14	16
SOD1	1109	2027	792	439	221	306
ACAP2	119	295	207	60	47	55
SDHB	103	277	85	71	23	29
TRAF6	77	97	81	16	21	35
GNG12	877	2676	708	709	229	272
CAD	38	279	125	58	37	33
ALDH2	745	731	440	194	209	157
NRAS	43	153	36	23	24	24
JAK2	411	433	250	140	97	98
GSK3B	74	220	116	50	50	28
GOT1	71	87	35	23	14	26
STAT6	572	468	478	195	131	170
PRIM2	44	57	39	9	26	11
DCK	32	61	46	26	11	10
PTK2	394	1066	606	262	181	264
BCL2	139	362	218	113	68	73
AR	107	295	321	114	73	72
GCLC	39	201	79	35	33	49
HEXA	321	987	409	265	159	217
STAT5A	86	141	232	88	45	48
APOA1	2	0	3	0	2	0
PSAT1	7	19	13	3	8	5
MTF1	31	112	55	22	32	30
ODC1	128	178	82	69	50	51
SLC16A1	608	1024	506	240	134	576
FDXR	1	7	12	4	5	0
CAB39	564	1740	562	953	179	218
OGDHL	0	5	13	0	7	2
APOB	21	48	50	16	35	11
ME2	381	1587	861	780	338	385
MAPK1	203	640	325	238	158	229
PRDX1	170	524	76	182	92	140
ZNF610	10	26	21	12	17	4
PRIM1	9	11	16	3	4	14
CTPS1	2	58	13	13	25	5
GLUL	789	525	548	454	368	296
AK3	126	312	105	117	120	97
STAT1	371	747	261	271	223	357
CACNA1A	603	2088	1050	1470	536	487
PTPN5	3	4	20	6	8	4
PIK3R3	55	144	105	42	112	51
CYP8B1	21	46	34	19	40	10
NDUFA12	18	58	9	34	12	16
GDA	8	36	22	13	21	16
MPC2	121	405	94	180	114	188
ENO3	6	19	12	7	16	9
SQSTM1	2192	3417	1387	2450	1176	2431
COX5A	89	312	68	150	78	190
GATM	15	31	14	17	20	17
TPH1	17	80	66	59	58	32
YWHAZ	651	1710	571	996	1048	1204
XRCC2	142	248	171	166	375	145
ATOX1	74	450	131	278	193	347
CD180	43	80	36	112	86	20
DEPTOR	2	6	4	4	7	10
ALDOB	4	0	0	1	4	4
XDH	9	10	10	18	37	16
